# Supplementary material for: The valproic acid rat model of autism presents with gut bacterial dysbiosis similar to that in human autism
Source: Mol Autism. 2018 Dec 10;9:61. doi: 10.1186/s13229-018-0251-3 (PMC6288876; doi:10.1186/s13229-018-0251-3)
Supplement: Supplementary file 1 — All OTU in a given gut microbial community. (XLSX 180 kb) [file 13229_2018_251_MOESM1_ESM.xlsx]

## Sheet: Sheet1
Greengene_ID	OTU_id	9R8 (Control female)	9R7 (Control female)	9R6 (Control female)	9R5 (Control female)	9R4 (Control female)	9R3 (Control female)	9R2 (Control female)	9R1 (Control female)	9R9 (Control male)	9R10 (Control male)	9R11 (Control male)	7R10 (VPA male)	7R9 (VPA male)	7R8 (VPA male)	7R7 (VPA male)	7R6 (VPA male)	7R5 (VPA male)	7R4 (VPA male)	7R3 (VPA female)	7R2 (VPA female)	7R1 (VPA female)	taxonomy
16559	sp_0821	4	2	6	4	0	0	0	4	0	3	2	0	2	0	3	2	2	0	3	2	0	Bacteria; Firmicutes; Clostridia; Clostridiales; Ruminococcaceae
25842	sp_0113	17	4	39	245	4	6	4	175	229	59	4	78	9	106	677	101	68	171	56	63	36	Bacteria; Firmicutes; Clostridia; Clostridiales
26704	sp_0042	514	554	221	503	257	237	172	212	368	163	542	698	1081	633	107	53	152	26	432	165	596	Bacteria; Firmicutes; Clostridia; Clostridiales; Clostridiaceae; Clostridium
28914	sp_1129	0	0	2	0	2	0	0	0	3	0	0	4	0	0	0	0	0	0	0	0	0	Bacteria; Firmicutes; Clostridia; Clostridiales; Lachnospiraceae; Roseburia
42372	sp_0366	32	64	35	77	79	23	83	0	38	33	103	260	29	0	0	12	0	0	0	0	0	Bacteria; Firmicutes; Erysipelotrichi; Erysipelotrichales; Erysipelotrichaceae; [Eubacterium]; dolichum
42395	sp_0314	0	0	31	0	45	18	36	147	0	0	0	31	125	0	0	0	108	78	0	0	0	Bacteria; Tenericutes; Mollicutes; RF39
43051	sp_0233	135	101	105	139	2	60	56	222	12	0	39	49	54	4	27	172	36	0	30	23	2	Bacteria; Firmicutes; Clostridia; Clostridiales; Ruminococcaceae; Ruminococcus
47100	sp_0595	0	0	0	0	0	0	0	0	0	0	0	0	0	0	4	0	0	0	0	0	0	Bacteria; Firmicutes; Clostridia; Clostridiales
48899	sp_0259	103	0	15	0	0	337	2	1186	13	0	2	0	8	0	0	141	0	0	0	0	0	Bacteria; Firmicutes; Clostridia; Clostridiales
50208	sp_0572	26	28	7	77	4	22	15	31	0	62	6	0	0	0	0	0	0	0	0	0	0	Bacteria; Firmicutes; Clostridia; Clostridiales
51677	sp_0162	74	498	2	16	1006	52	3	18	0	179	150	28	0	0	291	4	0	0	192	2	141	Bacteria; Firmicutes; Clostridia; Clostridiales
91486	sp_1453	0	0	0	0	0	0	0	2	0	0	0	0	0	0	0	0	0	0	0	0	0	Bacteria; Firmicutes; Clostridia; Clostridiales; Lachnospiraceae
95995	sp_0621	0	0	0	0	0	0	0	0	0	0	0	2	10	8	17	0	0	0	3	0	0	Bacteria; Firmicutes; Clostridia; Clostridiales; Ruminococcaceae
96194	sp_1172	0	0	0	0	0	0	0	0	0	0	0	0	0	0	0	2	0	0	0	0	0	Bacteria; Firmicutes; Clostridia; Clostridiales
97315	sp_0852	4	3	3	0	5	0	0	6	8	5	0	0	0	2	0	0	0	2	0	5	0	Bacteria; Firmicutes; Clostridia; Clostridiales
97639	sp_0713	0	0	0	0	0	0	0	0	0	0	0	0	4	2	11	0	4	19	9	18	0	Bacteria; Firmicutes; Clostridia; Clostridiales; [Mogibacteriaceae]
98048	sp_0753	4	3	12	0	2	3	3	12	5	2	0	3	0	5	0	8	4	7	7	2	5	Bacteria; Firmicutes; Clostridia; Clostridiales; Ruminococcaceae; Oscillospira
99566	sp_1030	0	0	0	0	0	0	0	0	0	0	2	0	9	0	0	0	4	0	0	0	0	Bacteria; Firmicutes; Clostridia; Clostridiales; Lachnospiraceae; Blautia
100567	sp_1456	0	0	0	0	0	0	0	0	0	0	0	0	0	0	0	0	2	0	0	0	0	Bacteria; Firmicutes; Clostridia; Clostridiales; Ruminococcaceae
101572	sp_0773	0	3	8	2	3	5	3	0	0	0	3	3	4	5	6	0	3	0	2	5	2	Bacteria; Firmicutes; Clostridia; Clostridiales; Ruminococcaceae
105964	sp_1457	0	0	0	0	0	0	0	0	0	0	0	0	0	0	0	0	0	2	0	0	0	Bacteria; Firmicutes; Clostridia; Clostridiales; Ruminococcaceae; Ruminococcus; flavefaciens
109703	sp_0774	0	0	5	0	10	4	0	3	3	3	10	4	7	0	5	0	2	0	4	5	2	Bacteria; Firmicutes; Clostridia; Clostridiales
110016	sp_0200	24	160	66	2	32	278	0	25	0	0	0	26	110	57	34	2	491	45	115	12	0	Bacteria; Firmicutes; Clostridia; Clostridiales
110161	sp_1458	0	0	0	0	0	0	0	0	0	0	0	2	0	0	0	0	0	0	0	0	0	Bacteria; Firmicutes; Clostridia; Clostridiales; Ruminococcaceae
110924	sp_1061	0	0	2	0	0	0	7	0	0	0	0	0	4	0	0	0	0	0	0	0	0	Bacteria; Firmicutes; Clostridia; Clostridiales
112758	sp_1343	0	0	0	0	0	0	0	2	0	0	0	0	0	0	0	2	0	0	0	0	0	Bacteria; Firmicutes; Clostridia; Clostridiales
113111	sp_0476	11	19	30	15	10	26	25	13	38	23	15	31	27	15	5	23	17	7	36	4	32	Bacteria; Firmicutes; Clostridia; Clostridiales; Ruminococcaceae; Oscillospira
113397	sp_1410	0	0	0	0	0	0	0	0	0	0	0	0	0	0	3	0	0	0	0	0	0	Bacteria; Firmicutes; Clostridia; Clostridiales
113581	sp_1459	0	0	0	0	0	0	2	0	0	0	0	0	0	0	0	0	0	0	0	0	0	Bacteria; Firmicutes; Clostridia; Clostridiales; Lachnospiraceae
114400	sp_0962	0	0	10	0	3	4	0	0	5	4	3	0	0	0	0	0	0	0	0	0	0	Bacteria; Firmicutes; Clostridia; Clostridiales; Ruminococcaceae
115049	sp_0750	0	0	2	3	3	3	4	2	3	0	10	7	10	3	8	0	11	3	5	2	2	Bacteria; Firmicutes; Clostridia; Clostridiales; Lachnospiraceae; Dorea
133719	sp_1253	0	0	0	0	0	0	0	0	0	0	0	0	0	0	0	2	2	0	0	0	0	Bacteria; Firmicutes; Clostridia; Clostridiales
137043	sp_1008	2	0	4	0	0	4	0	0	2	2	0	0	2	0	0	0	0	3	0	2	0	Bacteria; Firmicutes; Bacilli; Lactobacillales; Lactobacillaceae; Lactobacillus
143423	sp_1460	0	0	2	0	0	0	0	0	0	0	0	0	0	0	0	0	0	0	0	0	0	Bacteria; Firmicutes; Clostridia; Clostridiales; Ruminococcaceae; Oscillospira
144196	sp_1296	0	0	0	0	0	0	0	0	0	0	0	0	0	0	0	0	5	0	0	0	0	Bacteria; Firmicutes; Clostridia; Clostridiales
145737	sp_1461	0	0	0	0	0	0	0	0	0	0	0	0	0	0	0	0	0	0	2	0	0	Bacteria; Tenericutes; Mollicutes; RF39
146086	sp_0565	6	4	25	17	21	2	9	6	57	6	32	13	43	18	14	9	21	0	0	2	20	Bacteria; Firmicutes; Clostridia; Clostridiales; Lachnospiraceae
147195	sp_0837	0	0	0	0	0	0	0	0	0	0	0	5	4	2	2	3	4	7	6	4	5	Bacteria; Firmicutes; Clostridia; Clostridiales; Lachnospiraceae; Coprococcus
148925	sp_0054	687	512	365	729	0	203	308	1150	40	0	223	237	190	3	108	756	125	0	112	87	8	Bacteria; Firmicutes; Clostridia; Clostridiales; Ruminococcaceae; Ruminococcus
149188	sp_1048	0	0	0	0	0	0	0	0	0	0	0	0	0	0	0	0	0	0	2	11	4	Bacteria; Firmicutes; Clostridia; Clostridiales; Ruminococcaceae
153291	sp_0228	5	0	444	0	0	0	4	155	40	9	177	0	6	0	0	140	200	0	78	48	11	Bacteria; Firmicutes; Clostridia; Clostridiales
154424	sp_1462	0	0	0	0	0	0	0	0	0	0	0	0	0	0	0	0	2	0	0	0	0	Bacteria; Firmicutes; Clostridia; Clostridiales
157238	sp_1463	0	0	0	0	0	0	0	0	0	0	0	0	0	2	0	0	0	0	0	0	0	Bacteria; Firmicutes; Clostridia; Clostridiales
157382	sp_0029	53	2	29	2	0	215	0	156	0	10	528	0	0	0	63	75	2523	460	467	1696	0	Bacteria; Firmicutes; Clostridia; Clostridiales; Ruminococcaceae
158183	sp_1254	0	0	0	0	0	0	0	0	3	0	0	0	0	0	0	3	0	0	0	0	0	Bacteria; Firmicutes; Clostridia; Clostridiales; Ruminococcaceae; Oscillospira
160140	sp_1344	0	0	0	2	0	0	0	0	2	0	0	0	0	0	0	0	0	0	0	0	0	Bacteria; Firmicutes; Clostridia; Clostridiales
161762	sp_0155	16	32	128	40	54	37	228	88	340	49	34	458	277	80	15	100	32	9	32	0	26	Bacteria; Firmicutes; Clostridia; Clostridiales; Ruminococcaceae; Ruminococcus
161899	sp_1026	0	0	0	0	0	0	0	0	20	0	0	0	0	0	0	0	0	0	0	0	0	Bacteria; Firmicutes; Clostridia; Clostridiales; Lachnospiraceae
161993	sp_0641	0	0	0	2	0	0	0	0	0	0	0	0	0	0	0	0	0	49	2	0	0	Bacteria; Firmicutes; Clostridia; Clostridiales
164811	sp_1345	0	0	0	0	0	0	0	0	0	0	0	0	0	2	0	0	0	0	0	0	0	Bacteria; Firmicutes; Clostridia; Clostridiales; Lachnospiraceae
165445	sp_0754	3	8	0	0	0	0	0	115	0	0	0	0	0	0	0	0	0	3	0	0	0	Bacteria; Tenericutes; Mollicutes; RF39
166099	sp_1468	0	0	0	0	0	0	0	0	0	0	0	0	2	0	0	0	0	0	0	0	0	Bacteria; Firmicutes; Clostridia; Clostridiales
166637	sp_1469	0	0	0	0	0	0	0	0	0	0	0	0	0	2	0	0	0	0	0	0	0	Bacteria; Firmicutes; Clostridia; Clostridiales; Lachnospiraceae; Dorea
167420	sp_0766	0	14	0	5	33	30	0	2	0	8	2	0	0	0	0	0	5	21	0	0	0	Bacteria; Firmicutes; Erysipelotrichi; Erysipelotrichales; Erysipelotrichaceae
167509	sp_0375	8	0	7	57	54	25	11	61	50	24	6	2	0	0	2	5	0	9	43	26	8	Bacteria; Firmicutes; Clostridia; Clostridiales; Ruminococcaceae; Oscillospira
167910	sp_1470	0	0	0	0	0	0	0	2	0	0	0	0	0	0	0	0	0	0	0	0	0	Bacteria; Firmicutes; Clostridia; Clostridiales; Lachnospiraceae
168145	sp_0745	0	2	10	4	0	3	0	3	12	8	4	3	4	4	3	11	0	0	11	0	0	Bacteria; Firmicutes; Clostridia; Clostridiales; Ruminococcaceae
169815	sp_0148	49	677	13	641	593	32	0	65	0	38	28	0	0	0	246	4	6	427	47	40	14	Bacteria; Firmicutes; Clostridia; Clostridiales; Lachnospiraceae
169845	sp_0966	0	0	4	3	0	3	0	0	6	0	0	3	3	0	0	3	2	0	0	0	0	Bacteria; Firmicutes; Clostridia; Clostridiales
171396	sp_0498	14	0	0	0	0	0	0	10	0	0	0	0	0	0	22	0	0	13	37	31	14	Bacteria; Firmicutes; Clostridia; Clostridiales; Ruminococcaceae
171547	sp_0484	31	7	11	20	28	25	5	26	17	10	24	14	23	14	30	8	11	20	11	5	15	Bacteria; Firmicutes; Clostridia; Clostridiales; Ruminococcaceae
171559	sp_0826	2	4	2	3	0	0	9	4	3	2	4	0	2	2	2	2	3	0	5	4	0	Bacteria; Bacteroidetes; Bacteroidia; Bacteroidales; Bacteroidaceae; Bacteroides
172329	sp_0644	7	3	3	10	5	4	6	2	7	5	5	2	7	2	5	17	63	6	3	7	6	Bacteria; Firmicutes; Clostridia; Clostridiales; Ruminococcaceae
172777	sp_1346	0	0	0	0	0	0	0	0	2	0	0	0	0	0	0	0	2	0	0	0	0	Bacteria; Bacteroidetes; Bacteroidia; Bacteroidales; Bacteroidaceae; Bacteroides
173132	sp_1471	0	0	0	0	0	0	0	0	0	0	0	0	0	0	0	2	0	0	0	0	0	Bacteria; Firmicutes; Clostridia; Clostridiales
173245	sp_0711	0	0	0	0	0	0	0	0	0	0	0	2	0	14	45	0	0	0	0	0	0	Bacteria; Firmicutes; Clostridia; Clostridiales
173333	sp_0956	0	0	0	0	0	0	0	0	0	0	0	0	0	0	2	0	2	0	0	24	0	Bacteria; Firmicutes; Bacilli; Bacillales; Staphylococcaceae; Staphylococcus; sciuri
174278	sp_0746	0	0	0	0	0	0	0	0	83	40	2	0	0	0	0	0	0	0	0	0	0	Bacteria; Firmicutes; Clostridia; Clostridiales; Ruminococcaceae
174853	sp_1084	0	0	0	0	0	0	0	0	0	0	0	3	0	0	0	0	0	0	0	0	0	Bacteria; Firmicutes; Clostridia; Clostridiales
175432	sp_1208	0	0	0	0	0	0	0	3	0	2	0	0	0	0	0	0	0	0	0	0	0	Bacteria; Firmicutes; Clostridia; Clostridiales
175619	sp_0886	2	0	4	0	6	3	9	3	5	5	5	0	0	0	0	0	0	0	0	0	0	Bacteria; Firmicutes; Clostridia; Clostridiales; Ruminococcaceae; Ruminococcus
176034	sp_0957	0	0	0	2	0	0	9	0	0	0	0	0	0	0	0	2	2	0	0	0	3	Bacteria; Bacteroidetes; Bacteroidia; Bacteroidales; Bacteroidaceae; Bacteroides
176470	sp_0932	0	2	0	0	0	2	0	0	0	2	0	0	0	0	4	0	0	5	0	5	0	Bacteria; Firmicutes; Clostridia; Clostridiales; Clostridiaceae
176582	sp_1472	0	0	0	0	0	0	0	0	0	2	0	0	0	0	0	0	0	0	0	0	0	Bacteria; Firmicutes; Clostridia; Clostridiales; Ruminococcaceae
176604	sp_1189	0	0	3	0	0	3	0	0	0	0	0	2	0	0	0	0	0	0	0	0	0	Bacteria; Firmicutes; Clostridia; Clostridiales; Lachnospiraceae; Roseburia
177150	sp_0688	4	7	2	8	12	8	15	4	3	7	0	7	4	7	5	5	8	0	6	9	7	Bacteria; Bacteroidetes; Bacteroidia; Bacteroidales; Bacteroidaceae; Bacteroides
177704	sp_1474	0	0	0	0	0	0	0	0	0	0	0	0	2	0	0	0	0	0	0	0	0	Bacteria; Firmicutes; Clostridia; Clostridiales
177930	sp_0027	446	703	593	567	631	606	645	849	634	500	1199	427	1137	547	402	410	434	347	380	188	627	Bacteria; Firmicutes; Clostridia; Clostridiales; Lachnospiraceae
178242	sp_1255	0	0	0	0	0	0	0	3	0	0	0	0	0	0	0	0	0	0	0	0	0	Bacteria; Firmicutes; Clostridia; Clostridiales; Ruminococcaceae
178331	sp_1475	0	0	0	0	0	0	0	0	0	0	0	0	0	0	0	0	0	0	0	2	0	Bacteria; Verrucomicrobia; Verrucomicrobiae; Verrucomicrobiales; Verrucomicrobiaceae; Akkermansia; muciniphila
178478	sp_1256	0	0	0	0	0	0	2	0	0	0	0	0	0	0	0	0	2	0	0	0	0	Bacteria; Bacteroidetes; Bacteroidia; Bacteroidales; Rikenellaceae
178556	sp_1476	0	0	0	0	0	0	0	0	0	0	0	0	0	0	2	0	0	0	0	0	0	Bacteria; Firmicutes; Clostridia; Clostridiales
178665	sp_1116	0	0	2	0	0	0	3	0	2	0	0	5	0	0	0	0	0	0	0	0	0	Bacteria; Firmicutes; Clostridia; Clostridiales; Lachnospiraceae; Roseburia
178682	sp_0740	8	0	0	0	0	0	0	2	0	0	2	0	11	0	17	7	0	20	34	0	0	Bacteria; Firmicutes; Clostridia; Clostridiales; Lachnospiraceae; Coprococcus
178839	sp_0782	4	0	17	3	7	7	4	9	2	14	3	0	0	0	0	0	0	0	0	0	0	Bacteria; Firmicutes; Clostridia; Clostridiales; [Mogibacteriaceae]
179201	sp_0924	0	0	2	0	0	0	3	0	6	2	0	0	2	2	0	0	3	0	0	2	5	Bacteria; Firmicutes; Clostridia; Clostridiales; Ruminococcaceae
179362	sp_1348	0	0	2	0	0	0	0	0	0	0	0	2	0	0	0	0	0	0	0	0	0	Bacteria; Firmicutes; Clostridia; Clostridiales; Lachnospiraceae; Roseburia
179512	sp_1072	3	0	3	0	0	3	0	0	2	0	2	0	0	0	0	0	0	0	0	0	0	Bacteria; Firmicutes; Clostridia; Clostridiales; Clostridiaceae
179930	sp_1298	0	0	0	0	0	0	0	0	0	0	2	0	0	0	0	0	0	0	0	0	0	Bacteria; Firmicutes; Clostridia; Clostridiales; Clostridiaceae
180206	sp_1477	2	0	0	0	0	0	0	0	0	0	0	0	0	0	0	0	0	0	0	0	0	Bacteria; Firmicutes; Clostridia; Clostridiales; Lachnospiraceae
180529	sp_1478	0	0	0	0	2	0	0	0	0	0	0	0	0	0	0	0	0	0	0	0	0	Bacteria; Firmicutes; Clostridia; Clostridiales; Lachnospiraceae; Roseburia
180684	sp_0427	0	0	0	0	13	6	232	0	4	2	3	168	36	0	8	65	86	5	9	4	0	Bacteria; Cyanobacteria; 4C0d-2; YS2
180834	sp_1099	0	0	0	0	0	2	3	0	0	0	0	0	0	0	0	3	0	0	0	2	3	Bacteria; Bacteroidetes; Bacteroidia; Bacteroidales; Bacteroidaceae; Bacteroides
181174	sp_1173	0	0	0	0	0	0	0	0	0	0	0	0	0	0	0	0	2	2	0	2	0	Bacteria; Firmicutes; Clostridia; Clostridiales; Ruminococcaceae
181331	sp_1411	0	0	0	3	0	0	0	0	0	0	0	0	0	0	0	0	0	0	0	0	0	Bacteria; Firmicutes; Clostridia; Clostridiales
181485	sp_1480	0	0	0	0	0	0	0	0	0	0	0	2	0	0	0	0	0	0	0	0	0	Bacteria; Firmicutes; Clostridia; Clostridiales; Lachnospiraceae; Roseburia
181597	sp_1209	0	3	0	0	0	0	0	0	0	0	0	0	0	0	0	0	0	0	0	2	0	Bacteria; Firmicutes; Clostridia; Clostridiales
182033	sp_1349	0	0	0	0	0	0	0	2	0	0	0	0	0	0	0	0	0	0	0	0	0	Bacteria; Firmicutes; Clostridia; Clostridiales; Ruminococcaceae; Oscillospira
182061	sp_1481	0	0	0	0	0	0	0	0	0	2	0	0	0	0	0	0	0	0	0	0	0	Bacteria; Firmicutes; Clostridia; Clostridiales; Ruminococcaceae; Oscillospira
182255	sp_0705	5	5	0	8	7	9	16	5	2	0	4	4	0	7	0	8	6	2	7	6	6	Bacteria; Bacteroidetes; Bacteroidia; Bacteroidales; Bacteroidaceae; Bacteroides
182854	sp_1350	0	0	0	0	0	0	0	0	0	0	0	0	2	2	0	0	0	0	0	0	0	Bacteria; Bacteroidetes; Bacteroidia; Bacteroidales; Bacteroidaceae; Bacteroides
182891	sp_1015	4	0	3	0	0	3	0	3	0	0	2	0	0	0	3	0	0	0	0	0	0	Bacteria; Firmicutes; Clostridia; Clostridiales; Peptostreptococcaceae
183163	sp_1085	0	0	0	0	5	5	0	0	0	0	0	0	0	0	0	0	0	2	0	0	0	Bacteria; Firmicutes; Clostridia; Clostridiales; Lachnospiraceae
183362	sp_0463	15	6	31	16	30	38	3	14	51	37	27	44	22	35	28	6	13	16	10	2	13	Bacteria; Firmicutes; Clostridia; Clostridiales; Lachnospiraceae
183686	sp_0958	0	0	4	0	0	0	0	0	3	0	0	0	5	0	0	0	4	0	0	0	8	Bacteria; Firmicutes; Clostridia; Clostridiales; Ruminococcaceae
183870	sp_1351	0	0	0	0	0	0	4	0	0	0	0	0	0	0	0	0	0	0	0	0	0	Bacteria; Bacteroidetes; Bacteroidia; Bacteroidales; Bacteroidaceae; Bacteroides; uniformis
184009	sp_1482	0	0	0	0	0	0	0	0	0	0	0	0	0	0	0	0	0	0	0	0	2	Bacteria; Firmicutes; Clostridia; Clostridiales; Peptostreptococcaceae
184465	sp_1210	0	0	2	0	3	0	2	0	0	0	0	0	0	0	0	0	0	0	0	0	0	Bacteria; Firmicutes; Clostridia; Clostridiales; Lachnospiraceae; Roseburia
184753	sp_0759	0	7	3	7	5	3	12	0	3	4	3	8	0	4	2	5	2	3	9	4	5	Bacteria; Bacteroidetes; Bacteroidia; Bacteroidales; Bacteroidaceae; Bacteroides
185126	sp_1352	0	0	0	0	0	0	0	0	0	0	0	0	0	0	0	0	0	2	0	2	0	Bacteria; Firmicutes; Clostridia; Clostridiales
185186	sp_1190	0	0	4	0	0	0	2	0	0	0	0	0	0	0	0	0	0	0	0	2	0	Bacteria; Verrucomicrobia; Verrucomicrobiae; Verrucomicrobiales; Verrucomicrobiaceae; Akkermansia; muciniphila
185222	sp_0887	0	0	0	0	0	2	0	0	0	0	0	0	4	5	2	2	6	3	2	8	4	Bacteria; Firmicutes; Clostridia; Clostridiales; Clostridiaceae
185915	sp_1483	0	0	0	0	0	0	0	0	0	0	0	2	0	0	0	0	0	0	0	0	0	Bacteria; Firmicutes; Clostridia; Clostridiales; Ruminococcaceae
186030	sp_1073	0	0	4	0	2	3	0	0	3	0	0	3	0	0	0	0	0	0	0	0	0	Bacteria; Firmicutes; Clostridia; Clostridiales; Lachnospiraceae; Roseburia
186194	sp_1211	0	0	0	0	0	0	0	0	0	5	0	0	0	0	0	0	0	0	0	0	2	Bacteria; Firmicutes; Clostridia; Clostridiales; Ruminococcaceae; Oscillospira
186352	sp_1484	0	0	0	0	0	0	0	0	0	0	0	0	0	0	0	0	0	0	0	0	2	Bacteria; Bacteroidetes; Bacteroidia; Bacteroidales; Bacteroidaceae; Bacteroides
186578	sp_1257	2	0	0	0	0	2	0	2	0	0	0	0	0	0	0	0	0	0	0	0	0	Bacteria; Firmicutes; Clostridia; Clostridiales; Ruminococcaceae; Ruminococcus
186886	sp_1485	0	0	0	0	0	0	0	0	0	0	0	0	0	2	0	0	0	0	0	0	0	Bacteria; Firmicutes; Clostridia; Clostridiales; Ruminococcaceae; Oscillospira
186906	sp_1031	0	0	3	0	0	0	0	2	3	2	0	7	0	0	0	0	0	2	0	0	0	Bacteria; Firmicutes; Clostridia; Clostridiales; Lachnospiraceae; Roseburia
187133	sp_0240	45	32	62	164	59	70	21	103	328	82	23	13	0	35	14	4	88	41	69	52	51	Bacteria; Firmicutes; Clostridia; Clostridiales; Ruminococcaceae
187350	sp_1486	0	0	2	0	0	0	0	0	0	0	0	0	0	0	0	0	0	0	0	0	0	Bacteria; Firmicutes; Clostridia; Clostridiales; Lachnospiraceae
187404	sp_0885	0	0	0	0	0	0	0	0	0	0	0	0	0	0	6	2	0	0	0	29	2	Bacteria; Firmicutes; Clostridia; Clostridiales; Ruminococcaceae
187466	sp_0818	7	3	11	0	0	4	0	3	2	7	2	0	3	0	8	0	4	6	0	3	3	Bacteria; Firmicutes; Clostridia; Clostridiales; Peptostreptococcaceae
187535	sp_1353	0	0	0	0	2	0	0	0	0	0	0	0	0	0	0	0	0	0	2	0	0	Bacteria; Firmicutes; Clostridia; Clostridiales
187759	sp_1049	0	0	4	0	3	0	0	0	4	0	0	0	0	0	0	0	0	0	0	0	0	Bacteria; Firmicutes; Clostridia; Clostridiales; Lachnospiraceae
187841	sp_1212	0	0	0	0	0	0	0	0	0	2	0	0	0	0	0	0	0	0	0	0	5	Bacteria; Bacteroidetes; Bacteroidia; Bacteroidales; Bacteroidaceae; Bacteroides
188234	sp_1258	0	0	0	0	0	0	2	0	0	0	0	4	0	0	0	0	0	0	0	0	0	Bacteria; Firmicutes; Clostridia; Clostridiales; Lachnospiraceae; Roseburia
188333	sp_1354	0	0	0	0	0	0	0	0	0	0	0	0	0	0	0	0	0	2	0	0	0	Bacteria; Firmicutes; Clostridia; Clostridiales; Lachnospiraceae
188457	sp_1213	0	0	0	0	0	0	0	0	0	0	0	0	3	0	0	0	0	2	2	0	0	Bacteria; Firmicutes; Clostridia; Clostridiales
188675	sp_1488	0	0	0	0	0	0	0	0	2	0	0	0	0	0	0	0	0	0	0	0	0	Bacteria; Firmicutes; Clostridia; Clostridiales; Lachnospiraceae
188697	sp_1214	0	0	3	0	0	0	0	0	4	0	0	0	0	0	0	0	0	0	0	0	0	Bacteria; Firmicutes; Clostridia; Clostridiales
188735	sp_1489	0	0	0	2	0	0	0	0	0	0	0	0	0	0	0	0	0	0	0	0	0	Bacteria; Bacteroidetes; Bacteroidia; Bacteroidales; Bacteroidaceae; Bacteroides
189147	sp_0267	2	15	4	11	146	59	0	0	4	4	6	22	0	11	12	0	0	24	39	125	3	Bacteria; Firmicutes; Clostridia; Clostridiales; Ruminococcaceae; Ruminococcus
189181	sp_0921	2	2	3	4	4	0	2	2	0	2	2	3	0	0	3	3	0	0	3	0	0	Bacteria; Firmicutes; Clostridia; Clostridiales
189730	sp_1259	0	0	0	0	2	0	0	0	0	0	0	0	0	0	0	0	0	0	0	2	0	Bacteria; Bacteroidetes; Bacteroidia; Bacteroidales; S24-7
189920	sp_0880	0	4	4	5	0	0	6	0	4	0	0	0	0	0	0	2	4	0	2	0	2	Bacteria; Bacteroidetes; Bacteroidia; Bacteroidales; Bacteroidaceae; Bacteroides
190061	sp_1215	0	0	2	0	0	0	0	3	0	0	0	0	0	0	0	0	0	0	0	2	0	Bacteria; Firmicutes; Clostridia; Clostridiales
190309	sp_0772	0	0	2	3	2	2	30	7	9	0	3	2	0	7	0	3	4	0	2	4	11	Bacteria; Bacteroidetes; Bacteroidia; Bacteroidales; Bacteroidaceae; Bacteroides; uniformis
190658	sp_0284	35	64	42	56	36	38	64	71	74	25	15	46	30	54	41	38	37	15	128	39	45	Bacteria; Firmicutes; Clostridia; Clostridiales; Ruminococcaceae; Oscillospira
191216	sp_1355	0	0	0	0	0	0	0	0	0	0	2	0	0	0	0	0	0	0	0	0	0	Bacteria; Firmicutes; Clostridia; Clostridiales; Ruminococcaceae
191318	sp_1490	0	0	0	2	0	0	0	0	0	0	0	0	0	0	0	0	0	0	0	0	0	Bacteria; Firmicutes; Clostridia; Clostridiales
191389	sp_1020	0	0	2	0	0	0	0	0	0	0	0	0	0	0	0	0	4	0	0	3	0	Bacteria; Firmicutes; Clostridia; Clostridiales; [Mogibacteriaceae]
191439	sp_0831	3	3	0	5	0	3	5	2	3	0	3	2	0	2	0	0	5	2	2	7	0	Bacteria; Bacteroidetes; Bacteroidia; Bacteroidales; Bacteroidaceae; Bacteroides
191445	sp_0743	6	0	5	4	4	4	2	5	8	8	6	5	0	6	0	2	2	6	4	4	3	Bacteria; Firmicutes; Clostridia; Clostridiales; Ruminococcaceae; Oscillospira
191483	sp_0922	2	0	0	7	2	2	0	0	0	0	0	2	0	0	3	2	3	0	3	0	3	Bacteria; Bacteroidetes; Bacteroidia; Bacteroidales; Bacteroidaceae; Bacteroides
191502	sp_0840	0	0	0	0	0	0	0	0	0	0	0	0	0	0	0	10	0	56	0	0	0	Bacteria; Firmicutes; Clostridia; Clostridiales
191579	sp_1491	0	0	0	0	0	0	0	0	0	0	0	0	0	2	0	0	0	0	0	0	0	Bacteria; Firmicutes; Clostridia; Clostridiales
191816	sp_0297	180	27	5	16	15	6	3	3	15	70	41	202	36	0	18	3	4	11	232	7	4	Bacteria; Firmicutes; Clostridia; Clostridiales; Ruminococcaceae; Oscillospira
191833	sp_1299	0	0	0	0	0	0	0	0	0	0	0	2	3	0	0	0	0	0	0	0	0	Bacteria; Firmicutes; Clostridia; Clostridiales; Lachnospiraceae; Roseburia
191908	sp_1009	0	0	0	0	0	0	0	4	2	0	4	2	0	0	0	0	2	0	0	0	0	Bacteria; Firmicutes; Clostridia; Clostridiales; Ruminococcaceae
192079	sp_0220	0	0	0	0	0	0	0	0	0	0	209	96	181	0	0	2	98	66	0	0	0	Bacteria; Firmicutes; Clostridia; Clostridiales; Ruminococcaceae; Ruminococcus
192291	sp_0767	0	0	4	0	12	0	35	0	2	0	0	4	16	3	0	0	3	2	9	2	3	Bacteria; Firmicutes; Clostridia; Clostridiales; Lachnospiraceae
192641	sp_1153	0	0	3	0	0	2	0	0	0	0	0	5	0	0	0	0	0	0	0	0	0	Bacteria; Firmicutes; Clostridia; Clostridiales; Lachnospiraceae; Roseburia
192752	sp_0783	0	0	0	0	0	0	0	0	0	0	0	0	0	106	0	0	0	0	0	0	0	Bacteria; Firmicutes; Clostridia; Clostridiales
192839	sp_1216	0	0	0	2	0	0	0	0	0	2	0	0	0	0	0	0	0	0	0	0	0	Bacteria; Bacteroidetes; Bacteroidia; Bacteroidales; Bacteroidaceae; Bacteroides
192865	sp_1356	0	0	0	2	0	0	0	0	0	0	0	0	0	0	0	0	0	2	0	0	0	Bacteria; Bacteroidetes; Bacteroidia; Bacteroidales; Bacteroidaceae; Bacteroides
193343	sp_1131	0	0	2	0	2	2	0	0	3	0	0	2	0	0	0	0	0	0	0	0	0	Bacteria; Firmicutes; Clostridia; Clostridiales; Lachnospiraceae; Roseburia
193591	sp_0514	8	29	9	21	12	11	44	13	5	12	14	24	10	20	13	29	21	7	28	22	26	Bacteria; Bacteroidetes; Bacteroidia; Bacteroidales; Bacteroidaceae; Bacteroides
193617	sp_1357	0	0	0	0	0	0	0	0	0	0	0	0	0	4	0	0	0	0	0	0	0	Bacteria; Firmicutes; Clostridia; Clostridiales
193915	sp_1358	0	0	0	0	0	0	0	0	2	2	0	0	0	0	0	0	0	0	0	0	0	Bacteria; Firmicutes; Clostridia; Clostridiales; Lachnospiraceae; Roseburia
193950	sp_0996	0	0	4	0	0	0	0	5	0	0	7	0	0	0	0	0	0	0	0	0	0	Bacteria; Firmicutes; Clostridia; Clostridiales; Ruminococcaceae
193951	sp_1494	0	0	0	0	0	0	0	0	2	0	0	0	0	0	0	0	0	0	0	0	0	Bacteria; Firmicutes; Clostridia; Clostridiales; Lachnospiraceae
194014	sp_1359	0	0	0	0	0	0	0	0	0	4	0	0	0	0	0	0	0	0	0	0	0	Bacteria; Firmicutes; Clostridia; Clostridiales
194097	sp_0433	2	0	10	0	0	8	0	37	49	33	80	0	23	0	0	18	102	0	0	0	0	Bacteria; Firmicutes; Clostridia; Clostridiales; Ruminococcaceae
194665	sp_0795	6	2	12	5	0	2	0	0	3	5	7	0	0	0	0	0	3	11	17	5	0	Bacteria; Firmicutes; Clostridia; Clostridiales; Ruminococcaceae; Oscillospira
194863	sp_0862	0	0	0	0	0	0	38	0	20	0	0	0	0	0	0	0	0	0	0	0	0	Bacteria; Firmicutes; Clostridia; Clostridiales; Lachnospiraceae; Blautia
194909	sp_0990	0	2	0	0	0	3	5	0	0	0	0	0	0	0	0	2	0	0	2	2	2	Bacteria; Bacteroidetes; Bacteroidia; Bacteroidales; Bacteroidaceae; Bacteroides
195004	sp_1218	0	0	0	0	0	0	0	3	0	0	0	4	0	0	0	0	0	0	0	0	0	Bacteria; Firmicutes; Clostridia; Clostridiales; Lachnospiraceae
195086	sp_1412	0	0	3	0	0	0	0	0	0	0	0	0	0	0	0	0	0	0	0	0	0	Bacteria; Firmicutes; Clostridia; Clostridiales; Lachnospiraceae; Roseburia
195207	sp_1495	0	0	2	0	0	0	0	0	0	0	0	0	0	0	0	0	0	0	0	0	0	Bacteria; Firmicutes; Clostridia; Clostridiales; Lachnospiraceae; Roseburia
195307	sp_1360	0	0	0	2	0	2	0	0	0	0	0	0	0	0	0	0	0	0	0	0	0	Bacteria; Firmicutes; Clostridia; Clostridiales
195465	sp_1413	0	0	0	0	0	0	0	0	0	3	0	0	0	0	0	0	0	0	0	0	0	Bacteria; Firmicutes; Clostridia; Clostridiales; Lachnospiraceae
195621	sp_1361	0	0	0	0	0	0	0	0	0	0	0	0	0	4	0	0	0	0	0	0	0	Bacteria; Firmicutes; Clostridia; Clostridiales
195622	sp_0959	3	3	2	3	5	0	0	4	0	0	0	2	0	0	0	2	0	0	4	4	0	Bacteria; Firmicutes; Clostridia; Clostridiales
195769	sp_1016	0	0	0	4	4	0	0	3	2	0	9	0	0	0	0	0	0	0	0	0	0	Bacteria; Firmicutes; Clostridia; Clostridiales; Lachnospiraceae; Blautia
195840	sp_1260	0	0	0	0	0	0	0	2	0	0	0	0	0	0	0	0	0	2	0	0	0	Bacteria; Firmicutes; Clostridia; Clostridiales; Ruminococcaceae
195982	sp_0212	41	78	373	10	76	46	49	106	581	139	89	62	14	61	24	135	8	25	70	6	44	Bacteria; Firmicutes; Clostridia; Clostridiales; Ruminococcaceae; Ruminococcus
196035	sp_1496	0	0	0	0	0	0	0	2	0	0	0	0	0	0	0	0	0	0	0	0	0	Bacteria; Firmicutes; Clostridia; Clostridiales
196131	sp_0098	23	0	142	0	0	249	11	55	27	20	38	29	0	0	141	0	798	10	560	178	278	Bacteria; Bacteroidetes; Bacteroidia; Bacteroidales; [Odoribacteraceae]; Odoribacter
197072	sp_1032	0	0	0	6	0	0	0	0	0	0	0	0	0	2	0	0	0	0	0	0	9	Bacteria; Bacteroidetes; Bacteroidia; Bacteroidales; Bacteroidaceae; Bacteroides
197291	sp_1301	0	0	2	0	3	0	0	0	0	0	0	0	0	0	0	0	0	0	0	0	0	Bacteria; Firmicutes; Clostridia; Clostridiales
197314	sp_1219	0	0	0	2	2	0	0	0	0	0	0	0	0	0	0	0	0	0	0	0	0	Bacteria; Firmicutes; Clostridia; Clostridiales; Lachnospiraceae; Roseburia
197334	sp_0991	0	0	6	2	7	2	0	0	2	0	0	4	0	0	0	0	0	0	0	0	0	Bacteria; Firmicutes; Clostridia; Clostridiales; Lachnospiraceae
197364	sp_1191	0	0	2	0	4	0	0	0	0	0	0	2	0	0	0	0	0	0	0	0	0	Bacteria; Firmicutes; Clostridia; Clostridiales; Lachnospiraceae
197452	sp_1497	0	2	0	0	0	0	0	0	0	0	0	0	0	0	0	0	0	0	0	0	0	Bacteria; Firmicutes; Clostridia; Clostridiales; Lachnospiraceae
197924	sp_0714	0	3	0	11	13	2	21	5	18	2	6	0	0	7	0	11	5	0	0	10	9	Bacteria; Bacteroidetes; Bacteroidia; Bacteroidales; Bacteroidaceae; Bacteroides; uniformis
198422	sp_1498	0	0	0	0	0	0	0	0	2	0	0	0	0	0	0	0	0	0	0	0	0	Bacteria; Firmicutes; Clostridia; Clostridiales
199059	sp_1499	0	0	0	0	0	2	0	0	0	0	0	0	0	0	0	0	0	0	0	0	0	Bacteria; Firmicutes; Clostridia; Clostridiales
199190	sp_1500	0	0	0	0	0	0	2	0	0	0	0	0	0	0	0	0	0	0	0	0	0	Bacteria; Bacteroidetes; Bacteroidia; Bacteroidales; Bacteroidaceae; Bacteroides
199268	sp_1261	0	0	0	0	0	0	0	0	0	0	0	0	0	0	2	0	2	0	0	0	0	Bacteria; Firmicutes; Clostridia; Clostridiales; Peptostreptococcaceae
199276	sp_0305	2	0	22	26	37	41	105	10	12	25	40	128	279	103	7	48	51	3	2	0	148	Bacteria; Firmicutes; Clostridia; Clostridiales; Lachnospiraceae; Coprococcus
199307	sp_0819	0	0	0	0	0	0	0	0	0	0	0	0	4	0	7	0	0	0	0	0	0	Bacteria; Firmicutes; Clostridia; Clostridiales; Ruminococcaceae
199344	sp_1501	0	0	2	0	0	0	0	0	0	0	0	0	0	0	0	0	0	0	0	0	0	Bacteria; Firmicutes; Clostridia; Clostridiales; Lachnospiraceae; Roseburia
199532	sp_1502	0	0	0	0	0	0	0	0	0	0	0	0	0	2	0	0	0	0	0	0	0	Bacteria; Firmicutes; Clostridia; Clostridiales
202162	sp_1175	0	0	0	0	0	0	0	0	0	0	5	0	0	0	0	0	2	0	0	0	0	Bacteria; Firmicutes; Clostridia; Clostridiales; Ruminococcaceae; Ruminococcus
203737	sp_1262	0	0	0	0	0	0	0	0	0	0	0	0	0	6	0	0	0	0	0	0	0	Bacteria; Firmicutes; Clostridia; Clostridiales
203970	sp_1414	0	0	0	3	0	0	0	0	0	0	0	0	0	0	0	0	0	0	0	0	0	Bacteria; Firmicutes; Clostridia; Clostridiales
204093	sp_0125	134	148	177	94	170	273	51	72	239	481	118	267	245	107	79	86	59	75	70	50	85	Bacteria; Firmicutes; Clostridia; Clostridiales; Ruminococcaceae; Oscillospira
204369	sp_0517	0	0	0	0	0	0	0	0	0	0	0	0	0	0	61	0	0	104	4	19	0	Bacteria; Firmicutes; Clostridia; Clostridiales; Christensenellaceae
207994	sp_1263	0	0	0	0	0	0	0	0	0	0	0	0	0	0	2	0	0	0	0	0	4	Bacteria; Firmicutes; Clostridia; Clostridiales; Ruminococcaceae; Ruminococcus
208571	sp_0703	6	2	6	0	5	3	0	15	6	7	7	2	9	7	0	19	19	11	5	3	4	Bacteria; Firmicutes; Clostridia; Clostridiales; Lachnospiraceae; Coprococcus
209475	sp_0352	36	26	10	0	7	7	10	12	2	19	161	9	39	12	32	19	56	10	64	21	3	Bacteria; Firmicutes; Clostridia; Clostridiales; Ruminococcaceae
210218	sp_1117	0	0	0	0	0	0	0	0	0	0	0	0	0	0	3	0	0	0	3	3	0	Bacteria; Firmicutes; Clostridia; Clostridiales
210262	sp_1505	0	0	0	0	0	0	0	0	0	0	0	0	0	0	2	0	0	0	0	0	0	Bacteria; Firmicutes; Clostridia; Clostridiales
210647	sp_1362	0	0	0	0	0	0	0	0	0	0	4	0	0	0	0	0	0	0	0	0	0	Bacteria; Firmicutes; Clostridia; Clostridiales; Ruminococcaceae; Ruminococcus
210867	sp_0588	0	0	0	0	6	0	3	6	0	0	12	0	0	0	0	18	15	18	27	8	31	Bacteria; Firmicutes; Clostridia; Clostridiales
210890	sp_0998	0	0	0	0	0	4	0	0	2	0	0	2	0	0	2	5	0	0	0	0	0	Bacteria; Firmicutes; Clostridia; Clostridiales; Ruminococcaceae
210895	sp_1363	0	0	0	0	0	0	0	0	0	0	0	0	0	0	0	0	2	2	0	0	0	Bacteria; Firmicutes; Clostridia; Clostridiales
211795	sp_0983	3	0	0	0	3	3	0	0	0	3	3	0	3	3	0	0	0	0	3	0	0	Bacteria; Firmicutes; Clostridia; Clostridiales
212532	sp_0447	0	0	3	0	0	4	0	0	0	2	14	8	15	7	38	11	54	41	24	98	45	Bacteria; Firmicutes; Clostridia; Clostridiales; Ruminococcaceae
214116	sp_0322	8	27	16	4	94	52	0	15	49	24	44	31	2	9	5	383	14	39	145	32	16	Bacteria; Firmicutes; Clostridia; Clostridiales
214919	sp_0021	675	1228	163	6	34	2076	10	173	548	855	867	256	474	206	3250	708	1169	3348	190	1834	1743	Bacteria; Firmicutes; Bacilli; Turicibacterales; Turicibacteraceae; Turicibacter
215060	sp_0426	10	0	0	0	0	0	0	0	10	113	29	0	0	0	24	0	2	14	15	13	82	Bacteria; Firmicutes; Clostridia; Clostridiales
215317	sp_1176	2	0	2	0	3	0	0	0	0	0	0	0	0	0	0	0	0	0	0	0	0	Bacteria; Firmicutes; Clostridia; Clostridiales; Lachnospiraceae
215495	sp_0775	0	0	2	3	0	4	0	5	0	0	0	0	0	0	5	2	2	7	5	27	6	Bacteria; Bacteroidetes; Bacteroidia; Bacteroidales; S24-7
216403	sp_1506	2	0	0	0	0	0	0	0	0	0	0	0	0	0	0	0	0	0	0	0	0	Bacteria; Firmicutes; Clostridia; Clostridiales
216524	sp_1415	0	0	0	0	0	0	0	0	0	0	0	0	0	0	0	0	0	0	0	0	3	Bacteria; Bacteroidetes; Bacteroidia; Bacteroidales; S24-7
217100	sp_0832	0	0	3	0	2	5	0	0	3	0	4	0	0	0	2	0	3	4	2	17	0	Bacteria; Bacteroidetes; Bacteroidia; Bacteroidales; S24-7
217109	sp_0953	0	0	0	0	0	0	0	0	0	0	0	0	13	0	7	0	0	0	6	3	4	Bacteria; Firmicutes; Clostridia; Clostridiales; Christensenellaceae
220856	sp_1221	0	0	0	0	0	2	0	0	0	0	0	0	0	0	0	0	0	0	0	0	0	Bacteria; Firmicutes; Clostridia; Clostridiales; Clostridiaceae
221429	sp_0637	0	0	14	0	0	14	3	0	4	0	0	21	42	4	3	43	78	0	0	2	4	Bacteria; Firmicutes; Clostridia; Clostridiales; Ruminococcaceae
227697	sp_0019	1285	1386	26	782	790	1109	654	1480	511	332	995	571	1803	7	49	1694	779	238	994	369	1078	Bacteria; Firmicutes; Clostridia; Clostridiales; Ruminococcaceae; Ruminococcus
227788	sp_0430	124	148	54	16	11	91	0	168	0	63	65	0	0	0	0	0	0	0	0	0	0	Bacteria; Firmicutes; Clostridia; Clostridiales
227819	sp_0479	0	0	11	0	2	2	8	5	54	29	68	26	38	2	10	20	31	15	2	6	3	Bacteria; Actinobacteria; Coriobacteriia; Coriobacteriales; Coriobacteriaceae
228232	sp_1043	0	0	0	0	0	0	0	0	2	0	2	3	2	0	0	0	0	0	3	3	0	Bacteria; Firmicutes; Clostridia; Clostridiales
228330	sp_1192	0	0	0	0	0	0	0	0	0	0	0	0	0	0	2	2	0	0	4	0	0	Bacteria; Firmicutes; Clostridia; Clostridiales; Ruminococcaceae; Ruminococcus; flavefaciens
228785	sp_0556	6	11	8	15	14	13	6	15	9	7	5	6	10	17	10	8	7	26	17	25	28	Bacteria; Firmicutes; Clostridia; Clostridiales; Dehalobacteriaceae; Dehalobacterium
228798	sp_0786	0	2	0	0	0	0	0	0	0	0	0	0	0	0	0	0	0	0	0	0	0	Bacteria; Firmicutes; Clostridia; Clostridiales
229088	sp_0661	0	0	0	0	0	0	0	0	0	0	0	0	0	51	180	3	0	0	0	0	0	Bacteria; Firmicutes; Clostridia; Clostridiales
229874	sp_0875	0	0	0	0	0	0	0	0	0	0	0	0	0	3	0	0	0	0	0	0	0	Bacteria; Tenericutes; Mollicutes; RF39
230618	sp_0741	0	4	4	2	12	30	0	0	3	0	9	7	9	0	0	0	0	6	25	0	5	Bacteria; Firmicutes; Clostridia; Clostridiales
230725	sp_0715	9	8	5	4	2	3	2	12	31	6	16	0	11	0	0	2	0	0	6	4	4	Bacteria; Firmicutes; Clostridia; Clostridiales; Ruminococcaceae; Oscillospira
231510	sp_1062	0	0	6	0	0	0	0	0	6	0	0	0	0	0	0	0	0	0	0	0	0	Bacteria; Actinobacteria; Coriobacteriia; Coriobacteriales; Coriobacteriaceae; Adlercreutzia
231563	sp_1222	0	0	0	0	2	0	0	0	0	0	0	0	0	0	0	0	0	0	0	0	0	Bacteria; Firmicutes; Clostridia; Clostridiales
232900	sp_1416	0	0	0	0	0	3	0	0	0	0	0	0	0	0	0	0	0	0	0	0	0	Bacteria; Actinobacteria; Coriobacteriia; Coriobacteriales; Coriobacteriaceae
233991	sp_1302	0	0	0	0	0	0	0	0	0	0	0	0	0	0	0	0	0	5	0	0	0	Bacteria; Firmicutes; Clostridia; Clostridiales; Lachnospiraceae
234912	sp_0403	5	6	18	4	0	0	0	15	0	0	13	150	66	112	5	3	92	0	29	2	4	Bacteria; Firmicutes; Clostridia; Clostridiales; Clostridiaceae; Clostridium
237468	sp_0131	0	0	671	0	0	0	0	0	76	34	0	0	0	430	293	3	3	0	0	3	0	Bacteria; Firmicutes; Clostridia; Clostridiales; Lachnospiraceae; Anaerostipes
238803	sp_1303	0	0	0	0	0	0	0	0	0	0	0	0	3	0	0	0	0	0	0	0	0	Bacteria; Firmicutes; Clostridia; Clostridiales; Lachnospiraceae
239562	sp_0243	0	0	0	0	0	0	0	0	2	2	154	0	0	0	7	0	56	0	34	0	5	Bacteria; Firmicutes; Clostridia; Clostridiales
239571	sp_1508	0	0	0	0	0	0	0	0	0	2	0	0	0	0	0	0	0	0	0	0	0	Bacteria; Firmicutes; Bacilli; Lactobacillales; Lactobacillaceae; Lactobacillus
241843	sp_1010	2	0	0	0	0	2	0	0	2	0	0	0	0	0	2	0	0	0	0	5	0	Bacteria; Firmicutes; Clostridia; Clostridiales; Clostridiaceae
245324	sp_1509	0	0	0	0	0	0	0	0	0	0	0	0	0	0	2	0	0	0	0	0	0	Bacteria; Actinobacteria; Coriobacteriia; Coriobacteriales; Coriobacteriaceae; Adlercreutzia
245625	sp_1510	0	0	0	0	0	0	0	0	0	0	0	2	0	0	0	0	0	0	0	0	0	Bacteria; Firmicutes; Clostridia; Clostridiales
248563	sp_0913	0	0	0	0	0	2	0	0	0	0	0	0	0	0	0	0	0	0	0	0	0	Bacteria; Firmicutes; Clostridia; Clostridiales; Clostridiaceae
251456	sp_1304	0	0	0	0	0	0	0	0	0	0	0	0	0	0	0	0	3	0	0	0	0	Bacteria; Firmicutes; Clostridia; Clostridiales; Ruminococcaceae
254011	sp_1305	0	0	0	0	0	0	0	0	0	5	0	0	0	0	0	0	0	0	0	0	0	Bacteria; Firmicutes; Bacilli; Lactobacillales; Lactobacillaceae; Lactobacillus
254600	sp_0847	34	0	0	0	0	0	0	0	0	0	0	0	0	0	0	0	13	0	0	0	0	Bacteria; Firmicutes; Clostridia; Clostridiales
257881	sp_1154	0	2	2	0	0	0	0	0	0	0	0	2	0	0	0	0	0	0	2	0	0	Bacteria; Firmicutes; Clostridia; Clostridiales; Ruminococcaceae; Oscillospira
258099	sp_0933	0	0	0	3	2	0	0	0	0	2	4	0	0	0	2	0	2	0	0	0	0	Bacteria; Firmicutes; Clostridia; Clostridiales; Ruminococcaceae
258169	sp_0650	45	26	9	21	0	0	0	0	45	21	7	0	0	0	2	2	3	7	0	0	0	Bacteria; Firmicutes; Clostridia; Clostridiales; Lachnospiraceae
258550	sp_1365	2	0	0	0	0	0	0	0	0	0	2	0	0	0	0	0	0	0	0	0	0	Bacteria; Firmicutes; Clostridia; Clostridiales; Ruminococcaceae
259111	sp_1194	2	0	0	0	0	0	2	0	0	0	2	0	0	2	0	0	0	0	0	0	0	Bacteria; Firmicutes; Bacilli; Lactobacillales; Lactobacillaceae; Lactobacillus
259212	sp_0970	0	2	8	0	0	9	0	0	0	3	0	0	2	0	3	0	0	0	0	0	0	Bacteria; Firmicutes; Clostridia; Clostridiales; Peptostreptococcaceae
259594	sp_0060	1486	1330	0	0	0	0	0	0	0	0	0	0	3	2931	1004	6	2	0	0	0	0	Bacteria; Firmicutes; Clostridia; Clostridiales
259820	sp_1118	0	0	2	0	0	0	0	0	0	2	0	0	0	0	3	0	3	0	0	0	0	Bacteria; Firmicutes; Clostridia; Clostridiales
259846	sp_0559	0	0	4	0	13	2	8	39	32	34	0	0	0	3	0	0	0	0	12	11	23	Bacteria; Firmicutes; Clostridia; Clostridiales
259870	sp_0303	42	21	19	24	89	255	0	23	27	86	96	0	0	12	2	0	26	40	181	317	24	Bacteria; Firmicutes; Clostridia; Clostridiales
259884	sp_0509	5	3	0	0	8	13	0	9	0	0	0	71	166	19	12	9	9	4	8	0	0	Bacteria; Firmicutes; Clostridia; Clostridiales; Ruminococcaceae
260233	sp_1512	0	0	0	2	0	0	0	0	0	0	0	0	0	0	0	0	0	0	0	0	0	Bacteria; Firmicutes; Clostridia; Clostridiales
260752	sp_0731	0	0	0	0	0	0	0	0	0	0	0	0	0	0	0	0	0	22	0	0	0	Bacteria; Firmicutes; Clostridia; Clostridiales; Lachnospiraceae
261076	sp_1223	0	0	0	0	0	0	2	0	0	0	3	0	0	0	0	0	0	0	0	0	0	Bacteria; Firmicutes; Clostridia; Clostridiales; Peptococcaceae; rc4-4
261265	sp_0304	0	208	0	0	0	0	0	0	0	322	0	0	0	0	54	0	0	3	10	20	14	Bacteria; Firmicutes; Clostridia; Clostridiales; Lachnospiraceae
261325	sp_1514	2	0	0	0	0	0	0	0	0	0	0	0	0	0	0	0	0	0	0	0	0	Bacteria; Firmicutes; Clostridia; Clostridiales; Ruminococcaceae
261486	sp_0950	0	0	0	0	0	0	0	0	0	0	0	5	0	0	0	0	0	0	0	0	0	Bacteria; Firmicutes; Clostridia; Clostridiales; Ruminococcaceae
261590	sp_0941	3	0	7	0	0	2	0	3	0	0	4	0	0	0	4	0	0	0	0	2	0	Bacteria; Firmicutes; Clostridia; Clostridiales
261999	sp_1515	0	0	0	0	0	0	0	0	0	0	0	0	0	0	0	2	0	0	0	0	0	Bacteria; Firmicutes; Clostridia; Clostridiales; Lachnospiraceae
262166	sp_1086	0	0	0	0	0	0	0	0	0	0	2	0	0	0	0	2	0	3	0	2	5	Bacteria; Bacteroidetes; Bacteroidia; Bacteroidales; S24-7
262258	sp_1087	0	0	0	0	0	0	0	5	0	0	0	3	0	0	0	0	0	0	0	0	0	Bacteria; Firmicutes; Clostridia; Clostridiales; Ruminococcaceae; Ruminococcus
262416	sp_1074	0	0	0	0	0	0	0	0	0	0	0	3	2	0	0	0	0	2	0	0	0	Bacteria; Firmicutes; Clostridia; Clostridiales
262541	sp_0804	0	3	0	3	15	5	0	3	0	0	5	0	0	0	10	0	0	0	2	0	0	Bacteria; Firmicutes; Clostridia; Clostridiales
262724	sp_1516	0	0	0	0	0	0	0	0	0	0	0	0	0	0	0	2	0	0	0	0	0	Bacteria; Firmicutes; Clostridia; Clostridiales; Lachnospiraceae; Roseburia
262869	sp_1367	0	0	0	2	0	0	0	0	0	0	0	0	0	0	0	0	0	0	0	0	0	Bacteria; Firmicutes; Clostridia; Clostridiales; Lachnospiraceae; [Ruminococcus]; gnavus
263380	sp_1517	0	0	0	0	0	0	0	0	2	0	0	0	0	0	0	0	0	0	0	0	0	Bacteria; Firmicutes; Clostridia; Clostridiales
263390	sp_1368	0	0	0	0	2	0	0	0	0	0	0	0	0	0	0	0	0	0	0	0	0	Bacteria; Firmicutes; Clostridia; Clostridiales
263546	sp_1417	0	0	0	0	0	0	0	0	0	3	0	0	0	0	0	0	0	0	0	0	0	Bacteria; Firmicutes; Clostridia; Clostridiales; Ruminococcaceae; Oscillospira
263839	sp_1088	0	0	0	0	0	0	0	0	2	0	0	0	0	0	0	6	0	0	0	2	0	Bacteria; Firmicutes; Clostridia; Clostridiales
263895	sp_0030	426	829	398	369	462	675	806	1066	739	259	586	494	304	1089	647	278	484	612	695	572	521	Bacteria; Firmicutes; Clostridia; Clostridiales; Peptococcaceae; rc4-4
264137	sp_1224	0	0	0	0	0	0	0	0	0	0	0	0	0	0	0	7	0	0	0	0	0	Bacteria; Firmicutes; Clostridia; Clostridiales; Lachnospiraceae
264155	sp_0622	5	7	9	56	43	18	3	2	0	3	3	4	2	0	0	5	2	23	10	9	21	Bacteria; Firmicutes; Clostridia; Clostridiales
264572	sp_0974	0	0	11	3	3	3	0	0	4	0	0	0	2	0	0	0	0	0	0	0	0	Bacteria; Firmicutes; Clostridia; Clostridiales; Lachnospiraceae
264586	sp_1177	0	0	0	0	0	3	0	0	0	2	0	0	0	0	0	0	0	0	0	2	0	Bacteria; Firmicutes; Clostridia; Clostridiales
264684	sp_1519	0	0	0	0	0	0	0	0	0	0	0	0	0	0	0	0	0	2	0	0	0	Bacteria; Firmicutes; Clostridia; Clostridiales
264734	sp_0017	204	306	460	611	575	1807	1313	475	273	263	569	924	1022	268	827	609	1132	1378	864	4218	1941	Bacteria; Bacteroidetes; Bacteroidia; Bacteroidales; S24-7
265483	sp_1225	0	0	0	0	0	0	0	0	0	0	0	0	0	0	0	0	2	0	0	0	5	Bacteria; Firmicutes; Clostridia; Clostridiales; Ruminococcaceae; Oscillospira
265958	sp_1522	0	0	0	0	2	0	0	0	0	0	0	0	0	0	0	0	0	0	0	0	0	Bacteria; Firmicutes; Clostridia; Clostridiales; Ruminococcaceae
266445	sp_0645	8	20	28	0	0	11	0	2	19	13	14	6	9	10	24	3	3	11	7	8	11	Bacteria; Firmicutes; Bacilli; Lactobacillales; Lactobacillaceae; Lactobacillus
266720	sp_1306	0	0	0	0	0	0	0	0	3	0	0	0	0	0	0	0	0	0	0	0	0	Bacteria; Firmicutes; Clostridia; Clostridiales; Ruminococcaceae
266726	sp_0179	19	107	51	105	436	368	0	144	263	95	77	19	35	49	67	16	7	66	119	78	110	Bacteria; Firmicutes; Clostridia; Clostridiales; Lachnospiraceae; Coprococcus
267368	sp_0528	0	0	0	0	0	0	0	0	0	0	0	0	0	0	0	0	32	0	22	0	0	Bacteria; Firmicutes; Clostridia; Clostridiales
267514	sp_1369	0	0	0	0	2	0	0	0	2	0	0	0	0	0	0	0	0	0	0	0	0	Bacteria; Firmicutes; Clostridia; Clostridiales; Lachnospiraceae; Coprococcus
267694	sp_0915	4	0	0	0	7	0	0	31	0	0	0	0	0	0	0	0	0	0	0	0	0	Bacteria; Firmicutes; Clostridia; Clostridiales
267714	sp_0652	0	0	0	0	0	0	0	0	0	0	0	11	11	9	4	0	2	2	0	4	0	Bacteria; Firmicutes; Clostridia; Clostridiales; Lachnospiraceae
267739	sp_1419	0	0	0	0	0	0	0	0	0	0	3	0	0	0	0	0	0	0	0	0	0	Bacteria; Firmicutes; Clostridia; Clostridiales; Ruminococcaceae
267905	sp_1226	0	0	0	0	0	0	0	0	0	0	0	0	0	0	0	0	0	2	0	0	0	Bacteria; Firmicutes; Clostridia; Clostridiales; Ruminococcaceae
267914	sp_1264	0	0	0	0	0	0	0	0	0	0	0	0	0	0	0	0	0	0	0	0	2	Bacteria; Firmicutes; Clostridia; Clostridiales
267958	sp_1063	0	0	0	0	0	0	0	0	0	0	0	0	0	0	0	0	0	4	0	0	0	Bacteria; Firmicutes; Clostridia; Clostridiales
268043	sp_0066	1354	230	231	511	301	175	8	359	192	763	438	30	9	259	270	46	3	31	379	170	140	Bacteria; Firmicutes; Clostridia; Clostridiales; Ruminococcaceae; Ruminococcus
268121	sp_0377	39	10	31	21	27	16	4	18	56	38	18	21	15	27	36	16	17	39	45	16	20	Bacteria; Firmicutes; Clostridia; Clostridiales; Lachnospiraceae; Coprococcus
268125	sp_1089	0	0	0	0	0	0	0	0	0	0	0	0	0	0	3	0	0	0	0	0	0	Bacteria; Firmicutes; Clostridia; Clostridiales; Lachnospiraceae; [Ruminococcus]; gnavus
268841	sp_0406	21	6	0	11	24	46	0	84	0	47	9	24	20	3	14	44	30	29	25	4	50	Bacteria; Firmicutes; Clostridia; Clostridiales; Lachnospiraceae
268910	sp_1033	0	0	0	0	0	0	0	0	0	2	0	3	0	0	2	0	0	0	0	0	0	Bacteria; Firmicutes; Clostridia; Clostridiales
269037	sp_1524	0	0	0	0	0	0	0	0	0	0	0	0	0	0	0	0	0	2	0	0	0	Bacteria; Firmicutes; Clostridia; Clostridiales
269176	sp_0828	9	5	9	2	0	4	0	2	5	3	6	0	6	3	0	0	3	0	2	0	4	Bacteria; Firmicutes; Clostridia; Clostridiales
269386	sp_0566	0	0	0	0	0	0	0	0	0	0	0	374	0	0	3	0	10	2	0	0	0	Bacteria; Cyanobacteria; 4C0d-2; YS2
269418	sp_0178	167	88	141	60	99	139	87	161	107	220	109	77	49	67	52	60	48	79	80	48	87	Bacteria; Firmicutes; Clostridia; Clostridiales; Ruminococcaceae; Oscillospira
269532	sp_1370	0	0	0	0	0	0	0	0	0	0	0	0	0	0	0	0	0	2	0	0	0	Bacteria; Firmicutes; Clostridia; Clostridiales; Ruminococcaceae
269611	sp_0833	3	10	0	0	8	7	0	0	0	0	0	5	27	6	0	0	0	0	0	0	0	Bacteria; Firmicutes; Clostridia; Clostridiales; Ruminococcaceae
269828	sp_0605	16	15	24	0	2	6	2	17	52	20	7	0	0	0	12	0	0	0	18	25	0	Bacteria; Firmicutes; Clostridia; Clostridiales; Lachnospiraceae; Coprococcus
270030	sp_0835	0	0	0	0	0	0	0	0	0	0	0	0	12	4	8	0	2	2	6	4	0	Bacteria; Firmicutes; Clostridia; Clostridiales; Ruminococcaceae; Ruminococcus
270059	sp_1178	0	0	0	0	2	2	0	0	3	0	0	0	0	0	0	0	0	0	0	0	0	Bacteria; Firmicutes; Clostridia; Clostridiales; Ruminococcaceae; Oscillospira
270094	sp_0726	0	6	3	2	2	3	13	6	2	2	5	5	6	5	5	9	10	0	6	8	5	Bacteria; Bacteroidetes; Bacteroidia; Bacteroidales; Bacteroidaceae; Bacteroides
270105	sp_1525	0	0	0	0	0	0	0	0	0	0	0	0	0	0	0	0	0	2	0	0	0	Bacteria; Firmicutes; Clostridia; Clostridiales
270145	sp_1001	0	0	0	0	3	0	0	0	0	0	0	0	0	0	0	0	0	0	0	0	0	Bacteria; Firmicutes; Clostridia; Clostridiales; Lachnospiraceae; Coprococcus
270200	sp_1179	0	0	3	0	0	0	0	2	0	0	0	0	0	0	0	0	0	2	0	0	0	Bacteria; Firmicutes; Clostridia; Clostridiales; Peptostreptococcaceae
270303	sp_0385	11	12	25	6	9	11	7	11	5	7	20	8	26	20	60	53	24	45	43	15	15	Bacteria; Firmicutes; Clostridia; Clostridiales; Ruminococcaceae; Oscillospira
270423	sp_1420	0	0	0	0	0	0	0	0	3	0	0	0	0	0	0	0	0	0	0	0	0	Bacteria; Firmicutes; Clostridia; Clostridiales
270480	sp_1526	0	0	0	0	0	0	0	0	0	0	0	0	0	0	0	2	0	0	0	0	0	Bacteria; Firmicutes; Clostridia; Clostridiales
270491	sp_1227	0	3	0	0	0	0	0	0	0	0	0	0	0	0	0	0	0	0	0	0	0	Bacteria; Firmicutes; Clostridia; Clostridiales
270759	sp_0636	38	0	22	13	20	3	0	0	66	27	6	0	0	0	4	5	0	21	0	0	0	Bacteria; Firmicutes; Clostridia; Clostridiales; Lachnospiraceae
270866	sp_1064	0	6	0	0	0	0	0	0	0	0	0	0	0	0	0	0	0	0	2	2	0	Bacteria; Firmicutes; Clostridia; Clostridiales; Ruminococcaceae; Oscillospira
270876	sp_0725	0	0	0	0	0	0	0	0	0	0	0	0	0	0	0	0	0	4	0	0	0	Bacteria; Firmicutes; Clostridia; Clostridiales
271139	sp_1100	0	0	2	3	2	0	0	0	2	0	0	0	0	0	0	0	0	0	0	0	0	Bacteria; Firmicutes; Clostridia; Clostridiales; Lachnospiraceae
271482	sp_0205	40	9	43	35	92	36	0	21	5	0	8	225	320	1517	21	10	0	0	7	0	5	Bacteria; Firmicutes; Clostridia; Clostridiales
271577	sp_1050	2	2	3	4	0	0	0	0	0	0	2	2	0	0	0	0	0	0	0	0	0	Bacteria; Firmicutes; Clostridia; Clostridiales
271766	sp_1044	2	0	0	0	0	0	0	0	0	2	0	0	0	0	14	0	0	0	0	0	0	Bacteria; Firmicutes; Clostridia; Clostridiales
272080	sp_0036	208	710	2341	989	2192	1284	404	1002	1726	0	0	109	370	241	2	0	32	12	220	138	414	Bacteria; Firmicutes; Clostridia; Clostridiales; Lachnospiraceae
272213	sp_1527	0	0	0	0	0	0	0	0	0	2	0	0	0	0	0	0	0	0	0	0	0	Bacteria; Firmicutes; Clostridia; Clostridiales; Ruminococcaceae
272277	sp_0411	39	22	75	17	2	14	0	27	10	88	26	30	85	11	20	34	13	40	14	2	4	Bacteria; Firmicutes; Clostridia; Clostridiales; Ruminococcaceae; Ruminococcus
272290	sp_0934	0	0	7	0	2	4	0	0	9	3	0	2	0	0	0	3	2	0	0	0	2	Bacteria; Firmicutes; Clostridia; Clostridiales
272328	sp_0454	44	11	21	7	34	32	4	11	74	34	22	11	40	3	17	24	21	14	15	8	10	Bacteria; Firmicutes; Clostridia; Clostridiales
272608	sp_1195	0	0	0	0	2	0	0	0	0	0	0	0	0	0	0	0	0	0	0	0	0	Bacteria; Firmicutes; Clostridia; Clostridiales; Lachnospiraceae
272701	sp_1528	0	0	0	0	0	0	0	0	0	0	0	2	0	0	0	0	0	0	0	0	0	Bacteria; Firmicutes; Clostridia; Clostridiales
272880	sp_0671	14	10	5	7	99	10	0	11	0	2	0	0	0	0	0	0	0	0	0	0	0	Bacteria; Firmicutes; Clostridia; Clostridiales
272949	sp_0784	0	15	0	2	0	3	0	10	0	0	2	0	0	0	18	0	0	0	2	0	0	Bacteria; Firmicutes; Clostridia; Clostridiales; Lachnospiraceae
272953	sp_0306	55	9	60	64	86	59	13	42	66	84	12	16	8	15	16	17	14	33	33	55	36	Bacteria; Firmicutes; Clostridia; Clostridiales; Ruminococcaceae; Oscillospira
272964	sp_1529	0	0	0	0	0	0	0	0	0	2	0	0	0	0	0	0	0	0	0	0	0	Bacteria; Firmicutes; Clostridia; Clostridiales
273648	sp_0599	0	0	0	2	3	4	0	37	0	29	4	0	0	84	0	11	0	0	9	2	0	Bacteria; Firmicutes; Clostridia; Clostridiales; Ruminococcaceae
273657	sp_1002	0	2	0	0	0	0	0	0	0	3	0	3	0	3	2	0	2	3	2	0	0	Bacteria; Firmicutes; Clostridia; Clostridiales; Peptococcaceae; rc4-4
273904	sp_0664	82	97	22	5	0	0	0	0	0	14	10	0	0	0	0	0	0	0	0	0	0	Bacteria; Firmicutes; Clostridia; Clostridiales; Lachnospiraceae
274016	sp_1421	0	0	3	0	0	0	0	0	0	0	0	0	0	0	0	0	0	0	0	0	0	Bacteria; Firmicutes; Bacilli; Lactobacillales; Lactobacillaceae; Lactobacillus
274018	sp_0147	3	0	0	0	0	0	0	0	0	0	2	0	0	0	20	0	0	203	46	23	89	Bacteria; Firmicutes; Clostridia; Clostridiales
274204	sp_1265	0	0	4	0	0	0	0	0	2	0	0	0	0	0	0	0	0	0	0	0	0	Bacteria; Firmicutes; Clostridia; Clostridiales
274455	sp_0535	0	3	2	4	6	4	0	3	5	4	9	0	0	0	185	4	0	15	8	92	10	Bacteria; Firmicutes; Clostridia; Clostridiales; Lachnospiraceae; Coprococcus
275138	sp_1051	3	0	0	3	0	0	0	0	0	7	2	0	0	0	0	0	0	0	2	0	0	Bacteria; Firmicutes; Clostridia; Clostridiales
275139	sp_0037	0	0	38	1424	194	2702	0	0	0	459	508	0	3	0	145	0	1180	1293	2	0	0	Bacteria; Firmicutes; Clostridia; Clostridiales
275218	sp_0492	23	7	18	14	13	8	15	30	13	31	9	8	10	4	5	10	7	36	28	20	13	Bacteria; Firmicutes; Clostridia; Clostridiales; Ruminococcaceae
275366	sp_0853	0	2	0	6	0	0	0	2	0	0	0	2	0	0	0	0	3	25	11	0	0	Bacteria; Firmicutes; Clostridia; Clostridiales
275483	sp_0107	1058	281	0	0	474	89	0	0	0	0	195	5	0	7	4	0	0	531	12	0	52	Bacteria; Firmicutes; Clostridia; Clostridiales
275511	sp_1530	2	0	0	0	0	0	0	0	0	0	0	0	0	0	0	0	0	0	0	0	0	Bacteria; Firmicutes; Clostridia; Clostridiales; Ruminococcaceae; Oscillospira
275895	sp_1531	0	0	0	0	0	0	0	0	0	0	0	0	0	0	2	0	0	0	0	0	0	Bacteria; Firmicutes; Clostridia; Clostridiales
276110	sp_0578	0	0	0	0	0	4	0	0	0	0	0	0	0	0	0	0	0	0	0	0	0	Bacteria; Firmicutes; Clostridia; Clostridiales
276125	sp_0442	0	0	0	0	5	0	0	0	0	0	0	0	0	0	37	0	0	40	0	60	2	Bacteria; Firmicutes; Clostridia; Clostridiales
276149	sp_0006	523	2352	456	1680	3271	1737	2776	972	578	588	1493	796	1081	1341	1865	1177	2716	3787	3065	2761	2641	Bacteria; Bacteroidetes; Bacteroidia; Bacteroidales; Porphyromonadaceae; Parabacteroides
276325	sp_1532	0	0	0	0	2	0	0	0	0	0	0	0	0	0	0	0	0	0	0	0	0	Bacteria; Firmicutes; Clostridia; Clostridiales
276402	sp_0816	0	0	0	9	0	0	4	0	0	2	0	9	0	0	0	11	18	13	7	0	2	Bacteria; Firmicutes; Clostridia; Clostridiales
276404	sp_1533	0	0	0	0	0	0	0	0	0	2	0	0	0	0	0	0	0	0	0	0	0	Bacteria; Firmicutes; Clostridia; Clostridiales; Ruminococcaceae; Oscillospira
276478	sp_0876	3	4	3	0	0	4	0	3	0	0	3	0	0	2	7	0	0	2	0	3	2	Bacteria; Firmicutes; Clostridia; Clostridiales; Clostridiaceae
276561	sp_1422	0	0	0	0	0	0	0	0	0	0	0	0	3	0	0	0	0	0	0	0	0	Bacteria; Firmicutes; Clostridia; Clostridiales; Ruminococcaceae
276592	sp_1155	2	0	0	0	0	0	0	0	0	4	0	0	0	0	0	0	0	0	0	0	0	Bacteria; Firmicutes; Clostridia; Clostridiales
276597	sp_0890	0	0	2	0	0	0	0	0	0	0	0	3	0	0	4	0	0	2	0	0	0	Bacteria; Firmicutes; Clostridia; Clostridiales
276643	sp_0547	0	0	0	3	0	0	0	0	0	0	0	0	0	28	29	2	109	39	24	0	7	Bacteria; Firmicutes; Clostridia; Clostridiales; Lachnospiraceae
276761	sp_0472	18	12	13	13	15	16	0	7	8	10	21	16	2	5	13	16	10	21	32	14	19	Bacteria; Firmicutes; Clostridia; Clostridiales; Ruminococcaceae
276770	sp_0114	642	177	571	856	795	768	36	29	110	293	231	0	0	0	13	0	0	0	22	193	45	Bacteria; Firmicutes; Clostridia; Clostridiales
276777	sp_0100	82	56	1119	262	465	124	221	403	930	230	113	35	594	47	26	113	73	35	70	28	42	Bacteria; Firmicutes; Clostridia; Clostridiales
276810	sp_1535	0	0	0	0	0	0	0	0	0	2	0	0	0	0	0	0	0	0	0	0	0	Bacteria; Firmicutes; Clostridia; Clostridiales
276985	sp_1371	0	0	0	0	0	0	0	0	2	2	0	0	0	0	0	0	0	0	0	0	0	Bacteria; Firmicutes; Clostridia; Clostridiales; Ruminococcaceae; Oscillospira
277090	sp_0629	0	0	0	0	0	0	0	0	0	0	0	0	0	0	0	0	0	0	36	18	13	Bacteria; Firmicutes; Clostridia; Clostridiales
277143	sp_0963	0	0	0	0	0	0	0	0	0	0	0	0	0	0	0	0	0	0	0	24	7	Bacteria; Firmicutes; Erysipelotrichi; Erysipelotrichales; Erysipelotrichaceae; Allobaculum
277163	sp_1423	0	0	0	3	0	0	0	0	0	0	0	0	0	0	0	0	0	0	0	0	0	Bacteria; Firmicutes; Clostridia; Clostridiales
277208	sp_0112	0	0	46	0	8	4	0	51	0	76	33	165	0	0	352	135	5	549	347	137	140	Bacteria; Firmicutes; Clostridia; Clostridiales
277215	sp_0651	0	0	0	0	131	29	0	3	0	0	8	0	0	0	0	0	0	0	0	0	0	Bacteria; Firmicutes; Clostridia; Clostridiales; Ruminococcaceae
277329	sp_1196	0	0	0	0	0	0	0	0	2	0	0	0	0	0	0	0	0	0	0	0	0	Bacteria; Firmicutes; Clostridia; Clostridiales
277349	sp_1228	0	0	0	0	3	0	0	0	0	2	0	0	0	0	0	0	0	0	0	0	0	Bacteria; Firmicutes; Clostridia; Clostridiales; Lachnospiraceae
277505	sp_1536	0	0	0	0	0	0	0	0	0	0	2	0	0	0	0	0	0	0	0	0	0	Bacteria; Firmicutes; Clostridia; Clostridiales
277589	sp_0942	0	0	0	0	0	0	0	0	0	0	0	0	0	0	0	0	0	0	13	0	0	Bacteria; Firmicutes; Clostridia; Clostridiales
277652	sp_1132	0	0	0	0	4	5	0	0	2	0	0	0	0	0	0	0	0	0	0	0	0	Bacteria; Firmicutes; Clostridia; Clostridiales; Ruminococcaceae
277922	sp_0674	7	20	16	0	4	21	2	5	0	11	3	3	0	3	39	3	2	5	6	0	6	Bacteria; Firmicutes; Clostridia; Clostridiales
277933	sp_0085	987	53	240	839	943	23	418	200	916	148	10	34	325	104	11	359	83	108	280	60	681	Bacteria; Firmicutes; Clostridia; Clostridiales; Ruminococcaceae
277946	sp_0134	0	0	81	0	0	0	371	178	0	0	48	0	0	0	0	353	111	224	2	0	0	Bacteria; Firmicutes; Clostridia; Clostridiales
278059	sp_1101	0	0	0	0	0	0	0	0	0	0	0	0	0	0	0	0	0	0	3	0	0	Bacteria; Firmicutes; Clostridia; Clostridiales; Lachnospiraceae
278098	sp_0169	134	56	147	26	0	0	4	88	43	13	9	99	135	329	248	93	61	86	374	53	301	Bacteria; Firmicutes; Clostridia; Clostridiales; Ruminococcaceae; Ruminococcus
278563	sp_1266	0	0	0	0	0	0	0	0	2	2	0	0	0	0	0	0	0	0	0	0	0	Bacteria; Firmicutes; Clostridia; Clostridiales
278901	sp_0091	305	129	340	359	453	171	182	375	461	172	100	77	36	62	75	384	40	270	107	68	115	Bacteria; Firmicutes; Clostridia; Clostridiales; Ruminococcaceae
279019	sp_0764	8	2	47	0	0	0	0	4	26	12	0	0	2	0	0	2	6	2	0	0	0	Bacteria; Firmicutes; Clostridia; Clostridiales
279026	sp_0721	6	8	5	5	10	3	2	10	6	7	5	0	12	3	10	2	3	3	2	0	0	Bacteria; Firmicutes; Clostridia; Clostridiales; Lachnospiraceae; [Ruminococcus]; gnavus
279107	sp_1309	0	0	0	0	0	0	0	0	0	0	0	2	0	0	0	0	3	0	0	0	0	Bacteria; Firmicutes; Clostridia; Clostridiales; Lachnospiraceae; Anaerostipes
279306	sp_0145	0	0	0	0	0	0	0	0	0	0	0	0	0	4	0	0	0	0	0	0	0	Bacteria; Firmicutes; Clostridia; Clostridiales; Ruminococcaceae
279340	sp_0567	2	0	0	0	0	0	10	15	0	9	0	2	0	0	0	6	28	44	0	0	0	Bacteria; Firmicutes; Clostridia; Clostridiales
279492	sp_1539	0	0	0	0	0	0	0	0	0	2	0	0	0	0	0	0	0	0	0	0	0	Bacteria; Firmicutes; Clostridia; Clostridiales; Ruminococcaceae; Ruminococcus
279534	sp_0295	0	231	0	57	52	26	10	35	31	10	19	58	0	37	64	14	11	39	55	128	101	Bacteria; Firmicutes; Clostridia; Clostridiales; Ruminococcaceae
279659	sp_0250	95	35	101	36	38	36	18	110	32	136	17	54	30	20	9	78	40	83	63	49	42	Bacteria; Firmicutes; Clostridia; Clostridiales; Ruminococcaceae; Ruminococcus
283117	sp_1090	0	0	0	0	0	0	0	0	0	0	2	0	2	0	0	0	0	0	0	0	0	Bacteria; Firmicutes; Clostridia; Clostridiales
287879	sp_0916	0	0	11	0	0	0	0	5	2	0	2	0	0	0	0	0	4	0	4	0	0	Bacteria; Firmicutes; Clostridia; Clostridiales
289730	sp_1197	0	0	2	0	0	0	0	0	0	0	2	0	0	0	2	0	0	0	0	2	0	Bacteria; Firmicutes; Clostridia; Clostridiales; Clostridiaceae
290235	sp_1229	0	0	0	0	0	3	0	0	0	0	0	0	0	0	0	0	2	2	0	0	0	Bacteria; Firmicutes; Bacilli; Lactobacillales; Lactobacillaceae; Lactobacillus
290251	sp_1310	0	0	0	3	0	0	2	0	0	0	0	0	0	0	0	0	0	0	0	0	0	Bacteria; Firmicutes; Clostridia; Clostridiales; Clostridiaceae; Clostridium
290338	sp_0101	0	33	384	181	1310	7	863	203	59	254	4	0	496	0	0	320	537	3	0	0	0	Bacteria; Firmicutes; Clostridia; Clostridiales
290514	sp_0778	0	0	21	0	0	0	4	0	0	0	0	0	0	0	0	0	0	0	0	0	0	Bacteria; Firmicutes; Clostridia; Clostridiales; Lachnospiraceae
291380	sp_0854	0	0	0	0	0	0	0	0	12	5	0	0	7	3	0	5	0	3	0	0	0	Bacteria; Firmicutes; Clostridia; Clostridiales
291823	sp_0345	17	26	46	12	17	11	92	36	63	17	43	59	290	35	36	36	51	10	23	34	25	Bacteria; Firmicutes; Clostridia; Clostridiales; Lachnospiraceae
292892	sp_1373	0	0	0	2	0	0	0	0	0	0	0	0	0	0	0	0	0	0	0	0	0	Bacteria; Firmicutes; Clostridia; Clostridiales
292910	sp_1021	0	0	0	0	0	0	0	0	0	0	0	8	0	0	0	0	7	2	0	0	0	Bacteria; Proteobacteria; Alphaproteobacteria; RF32
293754	sp_1544	2	0	0	0	0	0	0	0	0	0	0	0	0	0	0	0	0	0	0	0	0	Bacteria; Firmicutes; Clostridia; Clostridiales
294219	sp_0845	0	0	0	0	0	0	0	0	4	5	0	0	0	0	9	0	0	0	0	0	0	Bacteria; Firmicutes; Clostridia; Clostridiales; Lachnospiraceae; [Ruminococcus]; gnavus
295748	sp_0626	0	0	0	0	4	17	0	0	0	0	0	12	6	2	18	0	9	18	28	12	18	Bacteria; Firmicutes; Clostridia; Clostridiales; Ruminococcaceae
296038	sp_1157	0	0	0	0	0	0	0	0	0	0	0	0	0	0	0	0	0	0	0	0	2	Bacteria; Firmicutes; Clostridia; Clostridiales; Christensenellaceae
296330	sp_1545	0	0	0	0	0	0	0	0	0	0	0	0	0	0	0	0	2	0	0	0	0	Bacteria; Firmicutes; Clostridia; Clostridiales; Lachnospiraceae
296470	sp_1120	0	0	0	0	0	0	0	0	2	0	0	0	0	4	0	0	0	0	0	2	0	Bacteria; Bacteroidetes; Bacteroidia; Bacteroidales; Bacteroidaceae; Bacteroides
296837	sp_1133	0	0	0	0	0	0	0	0	0	0	0	0	2	0	0	0	0	0	0	2	2	Bacteria; Firmicutes; Clostridia; Clostridiales; Clostridiaceae
297143	sp_0930	0	2	6	0	0	4	2	0	0	2	0	0	0	0	3	0	2	0	0	3	2	Bacteria; Firmicutes; Clostridia; Clostridiales; Peptostreptococcaceae
297390	sp_1022	3	2	0	2	0	3	0	0	0	2	0	0	2	0	2	0	0	0	0	2	0	Bacteria; Firmicutes; Clostridia; Clostridiales; Clostridiaceae
297575	sp_1311	0	0	0	0	0	0	0	0	0	0	0	0	0	0	0	0	3	0	0	0	0	Bacteria; Firmicutes; Clostridia; Clostridiales; Lachnospiraceae
297677	sp_1034	0	0	2	2	2	0	0	0	4	4	0	0	0	0	0	0	0	0	0	0	0	Bacteria; Firmicutes; Clostridia; Clostridiales
297875	sp_1374	0	0	0	0	0	0	0	0	0	0	0	0	0	0	0	0	2	0	0	0	0	Bacteria; Firmicutes; Clostridia; Clostridiales; Ruminococcaceae
298486	sp_0843	5	5	2	2	2	13	2	2	3	4	0	0	3	0	0	0	0	2	8	0	0	Bacteria; Firmicutes; Clostridia; Clostridiales
299179	sp_0376	132	2	51	24	99	23	13	114	79	150	107	5	4	5	2	2	0	3	11	0	21	Bacteria; Firmicutes; Clostridia; Clostridiales; Lachnospiraceae
299639	sp_0960	0	0	8	0	0	0	0	0	0	2	2	0	3	0	0	0	3	0	0	2	0	Bacteria; Firmicutes; Clostridia; Clostridiales; Lachnospiraceae
299807	sp_1268	0	0	0	0	6	0	0	0	0	0	0	0	0	0	0	0	0	0	0	0	0	Bacteria; Firmicutes; Clostridia; Clostridiales
299997	sp_1230	0	0	0	2	0	0	0	0	3	0	0	0	0	0	0	0	0	0	2	0	0	Bacteria; Firmicutes; Clostridia; Clostridiales; Ruminococcaceae
300036	sp_1546	0	0	0	0	0	0	0	0	0	0	2	0	0	0	0	0	0	0	0	0	0	Bacteria; Firmicutes; Clostridia; Clostridiales; Lachnospiraceae
300644	sp_0301	75	0	52	0	0	0	388	0	23	636	303	0	0	0	0	0	0	0	0	0	0	Bacteria; Firmicutes; Clostridia; Clostridiales; Ruminococcaceae; Ruminococcus
300877	sp_0601	0	0	75	14	0	0	42	0	79	10	0	0	75	0	0	6	14	0	0	0	0	Bacteria; Firmicutes; Clostridia; Clostridiales; Lachnospiraceae; [Ruminococcus]
300990	sp_1091	0	0	0	0	2	0	4	3	0	0	0	0	0	0	0	0	5	0	0	0	0	Bacteria; Firmicutes; Clostridia; Clostridiales
301233	sp_0992	8	0	0	0	0	0	0	0	0	0	0	0	0	4	3	0	0	0	0	0	0	Bacteria; Firmicutes; Clostridia; Clostridiales
301498	sp_0249	78	104	39	26	32	43	37	75	22	38	144	32	82	125	100	40	130	164	61	47	33	Bacteria; Firmicutes; Clostridia; Clostridiales; Lachnospiraceae
301548	sp_1092	0	0	2	0	0	0	3	0	0	0	0	0	0	0	0	0	2	0	0	0	5	Bacteria; Firmicutes; Clostridia; Clostridiales
302429	sp_0798	0	12	21	0	0	0	30	3	15	0	2	0	0	0	0	7	5	0	0	0	0	Bacteria; Firmicutes; Clostridia; Clostridiales; Lachnospiraceae
302865	sp_0423	12	35	15	12	23	9	45	54	9	7	32	25	68	20	27	2	43	10	12	8	27	Bacteria; Firmicutes; Clostridia; Clostridiales; Lachnospiraceae
302975	sp_0984	0	0	3	0	0	0	0	2	2	0	3	0	2	0	3	0	0	3	0	0	2	Bacteria; Firmicutes; Bacilli; Lactobacillales; Lactobacillaceae; Lactobacillus
303037	sp_1548	0	0	0	0	0	0	0	0	0	0	0	0	0	0	2	0	0	0	0	0	0	Bacteria; Firmicutes; Clostridia; Clostridiales; Lachnospiraceae; Dorea
303269	sp_0570	135	17	0	4	0	2	0	50	10	0	0	0	0	2	0	0	70	14	0	0	0	Bacteria; Firmicutes; Clostridia; Clostridiales
304871	sp_1231	3	0	0	0	0	0	0	0	0	0	0	0	0	2	0	0	0	0	0	0	0	Bacteria; Firmicutes; Clostridia; Clostridiales
305946	sp_1375	0	0	0	0	0	0	0	0	0	0	0	0	0	0	0	0	0	0	0	0	4	Bacteria; Bacteroidetes; Bacteroidia; Bacteroidales; Bacteroidaceae; Bacteroides
306066	sp_0281	3	247	811	155	2	0	73	122	0	6	3	17	3	0	5	0	0	28	18	0	12	Bacteria; Firmicutes; Clostridia; Clostridiales
306699	sp_0817	0	0	3	7	7	0	0	0	0	22	6	0	0	0	0	0	0	0	6	6	8	Bacteria; Firmicutes; Clostridia; Clostridiales; Ruminococcaceae; Oscillospira
308117	sp_0462	5	4	92	40	13	11	10	13	2	2	12	0	20	2	0	0	5	0	0	0	0	Bacteria; Firmicutes; Clostridia; Clostridiales
308136	sp_0319	6	9	11	6	111	178	233	29	105	66	8	9	36	8	0	71	19	6	54	3	151	Bacteria; Firmicutes; Clostridia; Clostridiales; Ruminococcaceae; Oscillospira
308802	sp_0855	4	2	10	2	0	15	4	16	0	0	2	0	2	0	3	0	0	0	0	0	0	Bacteria; Firmicutes; Clostridia; Clostridiales; Clostridiaceae
309302	sp_0480	48	0	8	0	58	0	3	12	0	0	0	0	5	17	0	366	72	3	2	0	0	Bacteria; Firmicutes; Clostridia; Clostridiales; Ruminococcaceae; Oscillospira
309361	sp_0615	0	0	0	0	3	0	2	5	0	0	0	0	0	0	3	2	15	9	0	21	0	Bacteria; Firmicutes; Clostridia; Clostridiales; Ruminococcaceae
309441	sp_0247	3	2	18	14	43	190	4	50	48	31	148	87	36	14	7	0	96	37	39	39	99	Bacteria; Firmicutes; Clostridia; Clostridiales
309534	sp_1270	0	0	0	0	0	0	0	0	0	0	0	0	0	0	0	0	2	0	2	0	0	Bacteria; Firmicutes; Clostridia; Clostridiales
309720	sp_0723	2	0	2	6	5	6	5	4	4	4	3	2	7	6	2	0	5	0	2	7	4	Bacteria; Firmicutes; Clostridia; Clostridiales; Ruminococcaceae
310760	sp_0034	47	134	34	42	70	0	795	25	0	61	0	52	1129	401	337	2000	1551	1363	344	40	150	Bacteria; Firmicutes; Clostridia; Clostridiales; Lachnospiraceae
310979	sp_1551	0	0	0	0	0	0	0	0	2	0	0	0	0	0	0	0	0	0	0	0	0	Bacteria; Firmicutes; Clostridia; Clostridiales
311390	sp_1093	0	0	0	0	0	0	0	0	0	0	0	2	6	0	0	0	0	0	2	2	2	Bacteria; Firmicutes; Clostridia; Clostridiales; Lachnospiraceae; Coprococcus
311704	sp_1271	0	0	2	0	2	0	0	0	0	0	0	0	0	0	0	0	0	0	0	0	2	Bacteria; Firmicutes; Clostridia; Clostridiales; Lachnospiraceae; Roseburia
312145	sp_0717	17	9	21	3	9	11	0	3	5	31	7	4	0	0	0	0	0	7	2	0	4	Bacteria; Firmicutes; Clostridia; Clostridiales
312269	sp_1376	0	0	0	0	0	0	0	0	2	0	0	0	0	0	0	2	0	0	0	0	0	Bacteria; Firmicutes; Clostridia; Clostridiales; Ruminococcaceae; Oscillospira
312476	sp_1552	0	0	0	0	0	0	0	0	0	2	0	0	0	0	0	0	0	0	0	0	0	Bacteria; Firmicutes; Clostridia; Clostridiales
312490	sp_1377	0	0	0	0	2	0	0	0	0	0	0	0	2	0	0	0	0	0	0	0	0	Bacteria; Firmicutes; Clostridia; Clostridiales
312743	sp_1378	0	0	0	0	0	0	0	0	0	2	0	0	0	0	0	0	0	0	0	0	0	Bacteria; Firmicutes; Clostridia; Clostridiales; Lachnospiraceae
313037	sp_1102	0	0	2	0	0	0	0	0	2	0	0	0	0	0	0	2	3	0	2	0	0	Bacteria; Firmicutes; Clostridia; Clostridiales
313274	sp_1553	0	0	0	0	0	0	0	0	0	2	0	0	0	0	0	0	0	0	0	0	0	Bacteria; Firmicutes; Clostridia; Clostridiales; Ruminococcaceae; Oscillospira
313524	sp_0609	0	0	0	0	0	0	0	0	0	0	0	7	8	4	5	38	48	20	13	16	6	Bacteria; Firmicutes; Clostridia; Clostridiales; Ruminococcaceae
313764	sp_1312	0	0	0	3	0	0	0	0	0	0	0	0	0	0	0	0	0	0	0	0	0	Bacteria; Bacteroidetes; Bacteroidia; Bacteroidales; Bacteroidaceae; Bacteroides
313816	sp_0768	0	0	34	0	0	0	0	0	0	0	60	0	0	0	0	0	2	0	0	0	0	Bacteria; Firmicutes; Clostridia; Clostridiales; Ruminococcaceae
314359	sp_1035	0	0	0	0	0	0	0	0	0	0	0	0	0	0	2	0	0	0	0	0	0	Bacteria; Firmicutes; Clostridia; Clostridiales
315223	sp_1180	0	0	0	0	0	0	0	2	2	0	0	0	0	0	0	0	0	0	0	0	0	Bacteria; Firmicutes; Clostridia; Clostridiales; Ruminococcaceae; Anaerotruncus
315429	sp_1379	0	2	0	0	0	0	0	0	0	0	0	0	0	0	0	0	0	0	0	0	2	Bacteria; Bacteroidetes; Bacteroidia; Bacteroidales; Bacteroidaceae; Bacteroides
316381	sp_1554	0	0	0	0	0	0	0	0	0	0	0	0	2	0	0	0	0	0	0	0	0	Bacteria; Firmicutes; Clostridia; Clostridiales; Ruminococcaceae; Oscillospira
316544	sp_0633	5	0	19	7	9	35	0	11	15	8	11	0	0	5	19	5	0	0	8	0	0	Bacteria; Firmicutes; Clostridia; Clostridiales; Lachnospiraceae
316731	sp_1425	0	0	0	0	3	0	0	0	0	0	0	0	0	0	0	0	0	0	0	0	0	Bacteria; Firmicutes; Clostridia; Clostridiales; Lachnospiraceae
317633	sp_1036	0	0	2	0	0	0	0	0	0	2	0	0	0	0	0	0	0	0	0	0	0	Bacteria; Firmicutes; Clostridia; Clostridiales; Ruminococcaceae; Oscillospira
317740	sp_1555	0	2	0	0	0	0	0	0	0	0	0	0	0	0	0	0	0	0	0	0	0	Bacteria; Firmicutes; Clostridia; Clostridiales; Lachnospiraceae
318162	sp_1121	0	3	0	0	0	0	0	0	0	0	0	0	0	2	2	0	0	5	0	0	0	Bacteria; Firmicutes; Clostridia; Clostridiales
318370	sp_0452	88	10	31	6	3	24	5	113	54	61	46	13	30	4	4	15	4	3	46	0	27	Bacteria; Firmicutes; Clostridia; Clostridiales; Ruminococcaceae
318445	sp_1232	0	0	0	0	2	3	0	0	0	0	0	0	0	0	0	0	0	0	0	0	0	Bacteria; Firmicutes; Clostridia; Clostridiales; Lachnospiraceae
318503	sp_0389	31	9	40	49	22	16	8	62	53	50	21	9	21	16	7	28	8	21	12	2	9	Bacteria; Firmicutes; Clostridia; Clostridiales
318764	sp_0742	12	12	7	0	0	11	0	0	2	29	18	5	3	11	11	0	0	2	0	0	2	Bacteria; Firmicutes; Bacilli; Lactobacillales; Lactobacillaceae; Lactobacillus
318819	sp_1556	0	0	0	2	0	0	0	0	0	0	0	0	0	0	0	0	0	0	0	0	0	Bacteria; Firmicutes; Clostridia; Clostridiales
318928	sp_1557	0	0	0	0	0	0	0	0	0	0	0	0	0	0	0	2	0	0	0	0	0	Bacteria; Firmicutes; Clostridia; Clostridiales; Ruminococcaceae; Ruminococcus
319455	sp_1198	0	0	0	0	0	0	0	0	0	0	3	0	0	0	0	0	0	0	0	0	0	Bacteria; Firmicutes; Clostridia; Clostridiales; Christensenellaceae
319603	sp_1065	0	0	4	0	0	0	0	0	0	0	0	0	0	0	0	0	0	0	0	0	0	Bacteria; Firmicutes; Clostridia; Clostridiales; Lachnospiraceae; Anaerostipes
319621	sp_0911	0	0	0	2	5	0	5	3	0	0	0	4	0	2	0	0	0	0	0	3	0	Bacteria; Bacteroidetes; Bacteroidia; Bacteroidales; Prevotellaceae; Prevotella; copri
319909	sp_0225	2	89	488	235	336	331	90	146	71	13	17	49	20	2	47	0	0	30	2	0	2	Bacteria; Firmicutes; Clostridia; Clostridiales
320009	sp_1045	0	0	4	0	0	0	0	0	0	3	3	0	0	0	3	0	0	0	0	0	0	Bacteria; Firmicutes; Clostridia; Clostridiales; Lachnospiraceae
320224	sp_1381	0	0	0	0	0	0	0	0	0	4	0	0	0	0	0	0	0	0	0	0	0	Bacteria; Firmicutes; Clostridia; Clostridiales; Ruminococcaceae; Ruminococcus
320354	sp_0964	2	0	0	0	0	0	0	2	2	0	0	0	2	0	0	2	4	0	2	0	0	Bacteria; Firmicutes; Clostridia; Clostridiales; Ruminococcaceae; Oscillospira
320603	sp_1558	0	0	0	0	0	0	2	0	0	0	0	0	0	0	0	0	0	0	0	0	0	Bacteria; Firmicutes; Clostridia; Clostridiales
320972	sp_0574	0	0	0	20	0	0	2	24	4	29	7	3	43	10	5	0	20	13	42	0	2	Bacteria; Firmicutes; Clostridia; Clostridiales; Ruminococcaceae
321119	sp_1122	0	0	0	0	0	0	0	0	0	0	0	0	2	0	5	0	0	0	0	0	2	Bacteria; Firmicutes; Clostridia; Clostridiales; Clostridiaceae; SMB53
321195	sp_1559	0	0	0	0	0	0	0	0	0	0	0	0	0	0	0	0	0	0	2	0	0	Bacteria; Firmicutes; Clostridia; Clostridiales
321251	sp_1382	0	0	2	0	0	0	0	0	2	0	0	0	0	0	0	0	0	0	0	0	0	Bacteria; Firmicutes; Clostridia; Clostridiales; Ruminococcaceae; Ruminococcus
321484	sp_0416	26	24	37	22	56	49	67	49	16	24	14	25	75	8	4	18	3	17	90	0	0	Bacteria; Firmicutes; Clostridia; Clostridiales; Ruminococcaceae; Oscillospira
321762	sp_1003	0	3	0	0	0	0	0	0	0	0	0	0	0	0	0	0	0	0	0	0	0	Bacteria; Tenericutes; Mollicutes; RF39
321768	sp_1135	0	0	0	0	4	7	0	0	0	0	0	0	0	0	0	0	0	0	0	0	0	Bacteria; Firmicutes; Clostridia; Clostridiales
321825	sp_1158	0	0	0	0	2	4	0	0	0	0	0	0	0	0	0	0	0	0	4	0	0	Bacteria; Firmicutes; Clostridia; Clostridiales; Ruminococcaceae; Oscillospira
321952	sp_1272	4	0	0	0	0	0	0	0	0	0	0	0	0	0	0	2	0	0	0	0	0	Bacteria; Firmicutes; Clostridia; Clostridiales
321960	sp_0550	56	43	54	31	38	64	8	26	11	36	51	0	0	0	0	0	0	0	0	0	0	Bacteria; Firmicutes; Clostridia; Clostridiales; Ruminococcaceae
322062	sp_0466	0	0	0	0	0	48	8	30	65	50	14	34	37	18	17	14	8	18	15	3	18	Bacteria; Firmicutes; Clostridia; Clostridiales; Lachnospiraceae
322723	sp_1075	0	0	0	0	0	2	0	3	2	2	3	0	0	0	0	0	0	0	0	3	0	Bacteria; Firmicutes; Bacilli; Lactobacillales; Lactobacillaceae; Lactobacillus; reuteri
322840	sp_1052	0	2	8	0	0	0	0	0	0	0	0	0	3	0	4	0	0	0	0	0	0	Bacteria; Firmicutes; Clostridia; Clostridiales; Clostridiaceae
323154	sp_0102	845	300	120	69	250	173	85	78	0	44	17	195	144	15	65	30	24	16	115	43	71	Bacteria; Firmicutes; Clostridia; Clostridiales
323155	sp_1136	0	0	0	0	0	0	0	0	0	0	0	0	0	0	0	0	3	0	2	0	0	Bacteria; Firmicutes; Clostridia; Clostridiales
323386	sp_0340	3	0	26	0	0	0	0	0	0	3	7	11	50	19	2	0	3	0	8	7	9	Bacteria; Firmicutes; Clostridia; Clostridiales; Ruminococcaceae
323818	sp_0133	67	0	41	188	103	148	46	232	41	68	156	21	7	0	76	129	676	111	269	30	46	Bacteria; Firmicutes; Clostridia; Clostridiales
324157	sp_1159	0	0	0	0	0	0	2	2	0	0	3	0	0	0	0	0	0	0	0	0	0	Bacteria; Firmicutes; Clostridia; Clostridiales; Ruminococcaceae
324522	sp_1273	0	0	0	0	0	0	0	0	6	0	0	0	0	0	0	0	0	0	0	0	0	Bacteria; Firmicutes; Clostridia; Clostridiales
324820	sp_1017	0	0	2	0	2	0	0	0	0	0	0	0	2	0	2	0	2	0	2	0	0	Bacteria; Firmicutes; Clostridia; Clostridiales; Ruminococcaceae
324884	sp_1233	0	2	0	0	0	0	0	0	5	0	0	0	0	0	0	0	0	0	0	0	0	Bacteria; Firmicutes; Clostridia; Clostridiales; Lachnospiraceae
325419	sp_1561	0	0	0	0	0	0	0	0	2	0	0	0	0	0	0	0	0	0	0	0	0	Bacteria; Firmicutes; Clostridia; Clostridiales; Clostridiaceae
325503	sp_1160	0	0	2	0	0	0	0	0	0	0	0	0	0	0	0	0	0	0	0	0	3	Bacteria; Bacteroidetes; Bacteroidia; Bacteroidales; Bacteroidaceae; Bacteroides
325633	sp_0398	34	9	101	18	30	20	10	27	110	24	27	12	39	26	21	19	11	21	25	12	14	Bacteria; Firmicutes; Clostridia; Clostridiales; Ruminococcaceae
325836	sp_1053	0	2	0	4	0	0	0	0	0	0	0	0	0	0	0	0	0	0	0	2	0	Bacteria; Firmicutes; Clostridia; Clostridiales
325850	sp_0230	2	2	6	24	87	25	75	80	10	4	15	404	192	20	10	2	151	45	22	51	105	Bacteria; Proteobacteria; Alphaproteobacteria; RF32
326569	sp_1562	0	0	0	0	0	0	0	0	0	2	0	0	0	0	0	0	0	0	0	0	0	Bacteria; Firmicutes; Clostridia; Clostridiales; Clostridiaceae
326644	sp_0237	224	37	149	141	175	78	18	59	42	39	56	60	0	59	32	0	12	65	78	52	55	Bacteria; Firmicutes; Clostridia; Clostridiales
326940	sp_0424	22	22	2	43	38	15	7	124	72	8	6	5	0	5	7	29	5	4	40	6	8	Bacteria; Firmicutes; Clostridia; Clostridiales; Ruminococcaceae
327282	sp_0686	4	4	3	0	7	54	0	0	2	0	0	4	0	0	4	0	0	34	0	28	15	Bacteria; Firmicutes; Clostridia; Clostridiales
327284	sp_1313	0	0	0	0	0	0	0	0	0	0	0	0	0	0	0	0	0	0	0	2	0	Bacteria; Firmicutes; Clostridia; Clostridiales
327826	sp_1161	0	0	0	2	6	0	0	0	0	0	0	0	0	0	0	0	0	0	0	0	0	Bacteria; Firmicutes; Clostridia; Clostridiales; Lachnospiraceae
327900	sp_0262	74	21	75	23	7	61	9	102	90	135	56	69	87	27	46	99	18	59	54	15	20	Bacteria; Firmicutes; Clostridia; Clostridiales; Ruminococcaceae; Ruminococcus
328257	sp_1162	0	0	0	0	0	0	0	0	3	0	0	0	0	0	0	0	5	0	0	0	0	Bacteria; Firmicutes; Clostridia; Clostridiales; Dehalobacteriaceae
328573	sp_1076	0	0	3	0	0	2	0	0	0	0	0	2	0	0	0	0	0	0	0	0	0	Bacteria; Firmicutes; Clostridia; Clostridiales; Peptostreptococcaceae
328825	sp_1315	0	0	0	0	0	0	3	0	0	0	0	0	0	0	0	0	0	0	2	0	0	Bacteria; Firmicutes; Clostridia; Clostridiales; Lachnospiraceae
328905	sp_0571	26	4	4	4	14	27	0	14	21	22	2	28	7	4	17	0	22	22	12	18	12	Bacteria; Firmicutes; Clostridia; Clostridiales; Ruminococcaceae; Oscillospira
329032	sp_0788	0	0	0	8	0	0	0	5	9	0	31	0	6	0	0	0	0	7	0	8	0	Bacteria; Tenericutes; Mollicutes; RF39
329390	sp_0448	18	7	9	3	7	18	2	19	7	19	25	26	19	5	38	7	18	26	26	23	28	Bacteria; Firmicutes; Clostridia; Clostridiales; Ruminococcaceae
329399	sp_1316	0	0	2	0	0	0	0	0	0	3	0	0	0	0	0	0	0	0	0	0	0	Bacteria; Firmicutes; Clostridia; Clostridiales; Ruminococcaceae
329790	sp_0781	3	0	3	0	4	4	0	3	6	4	5	0	4	5	0	8	3	5	2	6	3	Bacteria; Firmicutes; Clostridia; Clostridiales; Ruminococcaceae; Oscillospira
330333	sp_0487	75	32	21	12	27	37	7	42	17	25	8	7	15	7	3	12	6	36	50	21	6	Bacteria; Firmicutes; Clostridia; Clostridiales; Ruminococcaceae; Oscillospira
330417	sp_1563	0	0	0	0	0	0	0	0	0	0	0	0	0	0	0	2	0	0	0	0	0	Bacteria; Firmicutes; Clostridia; Clostridiales; Lachnospiraceae
330460	sp_1011	7	0	3	3	0	3	0	0	2	2	3	0	0	0	0	0	0	0	0	0	0	Bacteria; Firmicutes; Clostridia; Clostridiales
330578	sp_0891	0	0	2	0	0	0	0	0	0	5	6	0	4	0	2	0	3	4	0	0	0	Bacteria; Firmicutes; Clostridia; Clostridiales; Ruminococcaceae
330921	sp_1104	0	0	0	0	0	0	0	0	0	0	8	0	0	0	0	0	0	0	0	0	0	Bacteria; Firmicutes; Clostridia; Clostridiales
331150	sp_0765	5	0	13	2	4	0	0	3	41	4	2	8	8	3	0	5	0	0	0	0	7	Bacteria; Firmicutes; Clostridia; Clostridiales; Lachnospiraceae
331262	sp_1564	0	0	0	0	2	0	0	0	0	0	0	0	0	0	0	0	0	0	0	0	0	Bacteria; Firmicutes; Clostridia; Clostridiales
331281	sp_0694	10	3	10	3	5	11	2	5	11	8	3	0	7	5	9	0	4	2	2	4	3	Bacteria; Firmicutes; Clostridia; Clostridiales; Clostridiaceae
331747	sp_0829	0	0	0	0	0	0	0	0	0	0	0	0	0	0	14	0	0	26	2	0	0	Bacteria; Firmicutes; Clostridia; Clostridiales
331772	sp_0003	506	454	838	724	1665	2546	814	1666	927	621	1590	1506	663	129	3188	661	2953	4997	3100	14071	3920	Bacteria; Bacteroidetes; Bacteroidia; Bacteroidales; S24-7
331786	sp_1317	0	0	0	0	0	0	0	0	0	5	0	0	0	0	0	0	0	0	0	0	0	Bacteria; Firmicutes; Clostridia; Clostridiales
331881	sp_0888	0	0	2	0	0	0	0	2	0	0	2	0	2	0	4	0	0	0	0	0	0	Bacteria; Firmicutes; Clostridia; Clostridiales; Peptostreptococcaceae
332608	sp_0079	481	184	193	46	121	57	53	384	23	608	54	285	236	248	62	54	257	312	501	13	323	Bacteria; Firmicutes; Clostridia; Clostridiales; Ruminococcaceae; Oscillospira
332776	sp_0518	0	0	0	0	0	19	0	0	0	0	0	0	0	0	12	0	0	82	2	10	2	Bacteria; Firmicutes; Clostridia; Clostridiales; Lachnospiraceae
333178	sp_0789	5	10	16	0	2	4	0	0	2	10	13	8	3	7	6	0	0	0	0	4	0	Bacteria; Firmicutes; Bacilli; Lactobacillales; Lactobacillaceae; Lactobacillus
333341	sp_0801	2	0	3	13	7	5	2	7	40	2	0	0	0	0	0	0	3	0	2	0	0	Bacteria; Firmicutes; Clostridia; Clostridiales; Lachnospiraceae
333807	sp_0531	5	126	13	28	17	20	15	25	19	7	8	9	9	9	0	9	21	3	0	0	2	Bacteria; Firmicutes; Clostridia; Clostridiales; Lachnospiraceae
333837	sp_1163	0	2	0	0	0	0	0	0	0	0	0	2	0	2	4	0	0	0	0	0	0	Bacteria; Firmicutes; Clostridia; Clostridiales
334328	sp_0110	160	0	0	0	649	41	10	315	0	130	150	0	4	0	6	0	0	0	0	0	0	Bacteria; Firmicutes; Clostridia; Clostridiales; Lachnospiraceae
334365	sp_0033	1743	894	985	1072	1227	451	353	963	0	731	845	1284	361	0	886	1049	232	197	734	824	791	Bacteria; Firmicutes; Clostridia; Clostridiales
334427	sp_1565	0	2	0	0	0	0	0	0	0	0	0	0	0	0	0	0	0	0	0	0	0	Bacteria; Firmicutes; Clostridia; Clostridiales
334575	sp_0222	0	0	0	0	770	244	0	0	0	0	0	45	0	75	2	0	19	0	15	0	0	Bacteria; Firmicutes; Clostridia; Clostridiales
334699	sp_0691	0	2	5	4	6	0	12	6	13	2	3	14	24	3	4	4	6	0	11	3	10	Bacteria; Firmicutes; Clostridia; Clostridiales; Ruminococcaceae; Oscillospira
334705	sp_1054	0	0	3	0	0	0	0	0	0	0	0	0	0	0	0	0	4	0	0	2	4	Bacteria; Firmicutes; Clostridia; Clostridiales; Ruminococcaceae
334734	sp_0814	2	0	0	0	0	0	10	2	0	0	5	9	4	0	2	6	4	2	0	3	0	Bacteria; Firmicutes; Clostridia; Clostridiales
334935	sp_0291	3	0	7	3	19	47	20	6	83	27	6	180	45	3	0	9	35	4	6	12	38	Bacteria; Firmicutes; Clostridia; Clostridiales; Ruminococcaceae; Oscillospira
335057	sp_1077	0	0	0	3	0	0	0	0	0	0	0	0	0	0	0	0	0	2	3	0	0	Bacteria; Firmicutes; Clostridia; Clostridiales
335256	sp_1181	0	0	0	0	0	0	3	0	0	0	0	0	3	0	0	0	0	0	0	0	0	Bacteria; Firmicutes; Bacilli; Lactobacillales; Streptococcaceae; Lactococcus; garvieae
335401	sp_1566	0	0	0	0	0	0	0	0	0	2	0	0	0	0	0	0	0	0	0	0	0	Bacteria; Firmicutes; Clostridia; Clostridiales
335488	sp_1004	4	0	3	0	0	0	0	2	11	0	2	0	0	0	0	0	0	0	0	0	0	Bacteria; Firmicutes; Clostridia; Clostridiales; Lachnospiraceae
335701	sp_1567	0	0	0	0	0	0	0	0	0	0	0	0	0	0	0	0	0	0	0	2	0	Bacteria; Firmicutes; Clostridia; Clostridiales; Lachnospiraceae; [Ruminococcus]; gnavus
336012	sp_1384	0	0	0	0	0	0	2	0	0	0	0	0	0	0	0	0	0	0	0	0	0	Bacteria; Bacteroidetes; Bacteroidia; Bacteroidales; Bacteroidaceae; Bacteroides; uniformis
336174	sp_1318	0	0	0	0	2	0	0	0	0	0	0	0	0	0	0	0	0	0	0	0	0	Bacteria; Firmicutes; Clostridia; Clostridiales; Lachnospiraceae
336277	sp_1123	0	0	0	0	0	0	0	0	0	0	0	0	0	0	0	0	0	0	3	0	0	Bacteria; Firmicutes; Clostridia; Clostridiales
336375	sp_0896	0	0	0	0	2	0	46	0	0	0	0	0	0	0	0	0	0	0	0	0	0	Bacteria; Firmicutes; Clostridia; Clostridiales; Lachnospiraceae; Blautia
336691	sp_0180	48	25	33	57	262	100	30	114	52	52	42	18	31	39	39	23	19	236	58	119	35	Bacteria; Firmicutes; Clostridia; Clostridiales; Ruminococcaceae
336710	sp_0662	0	9	7	9	16	3	21	11	3	0	6	13	6	8	5	8	6	2	14	9	5	Bacteria; Bacteroidetes; Bacteroidia; Bacteroidales; Bacteroidaceae; Bacteroides
336759	sp_1568	0	0	0	0	0	0	0	0	0	0	0	0	0	0	0	0	0	2	0	0	0	Bacteria; Firmicutes; Clostridia; Clostridiales; Ruminococcaceae; Ruminococcus; flavefaciens
336830	sp_1319	0	0	0	0	0	0	0	0	0	0	0	0	0	3	2	0	0	0	0	0	0	Bacteria; Firmicutes; Clostridia; Clostridiales; Lachnospiraceae
336872	sp_0838	0	0	0	0	0	0	0	0	0	0	0	0	0	0	0	0	0	35	3	8	9	Bacteria; Firmicutes; Clostridia; Clostridiales; Lachnospiraceae; [Ruminococcus]; gnavus
336890	sp_1037	0	0	0	0	0	0	0	0	19	0	0	0	0	0	0	0	0	0	0	0	0	Bacteria; Firmicutes; Clostridia; Clostridiales; Ruminococcaceae
337167	sp_1385	0	2	0	0	0	0	0	0	0	0	0	0	0	0	0	0	0	2	0	0	0	Bacteria; Firmicutes; Clostridia; Clostridiales; Ruminococcaceae
337379	sp_0024	466	599	12	2	37	1980	0	0	587	1583	838	163	169	370	2245	198	319	1926	431	1801	2406	Bacteria; Firmicutes; Clostridia; Clostridiales; Clostridiaceae
337470	sp_1386	0	0	0	0	0	0	0	0	4	0	0	0	0	0	0	0	0	0	0	0	0	Bacteria; Firmicutes; Clostridia; Clostridiales
338177	sp_1105	0	0	0	0	5	6	0	0	0	0	0	0	0	0	0	0	0	0	0	0	0	Bacteria; Firmicutes; Clostridia; Clostridiales; Lachnospiraceae
338626	sp_1320	0	0	0	0	0	0	0	0	5	0	0	0	0	0	0	0	0	0	0	0	0	Bacteria; Firmicutes; Clostridia; Clostridiales; Lachnospiraceae; Blautia
338644	sp_0977	0	0	6	0	0	3	0	0	0	0	0	0	0	0	0	0	0	0	0	6	0	Bacteria; Actinobacteria; Coriobacteriia; Coriobacteriales; Coriobacteriaceae; Adlercreutzia
338778	sp_1012	0	0	0	0	3	0	0	2	0	0	0	0	0	0	0	0	0	0	0	0	0	Bacteria; Firmicutes; Clostridia; Clostridiales; Lachnospiraceae
338926	sp_0708	2	5	78	3	10	10	0	3	6	15	0	0	2	5	0	0	0	0	4	0	0	Bacteria; Firmicutes; Clostridia; Clostridiales; Lachnospiraceae
339031	sp_0163	165	41	92	40	88	135	13	154	92	121	32	105	586	76	73	75	202	26	124	16	173	Bacteria; Firmicutes; Clostridia; Clostridiales; Ruminococcaceae; Ruminococcus
339566	sp_0549	10	9	3	15	11	11	10	17	5	8	14	10	7	9	15	30	30	17	22	9	12	Bacteria; Firmicutes; Clostridia; Clostridiales; Ruminococcaceae
339712	sp_1569	2	0	0	0	0	0	0	0	0	0	0	0	0	0	0	0	0	0	0	0	0	Bacteria; Firmicutes; Clostridia; Clostridiales; Ruminococcaceae
339718	sp_0045	651	2137	9	1967	183	0	0	0	0	0	0	0	0	0	3	0	0	0	144	1059	3	Bacteria; Firmicutes; Clostridia; Clostridiales
339886	sp_0631	4	3	64	15	11	4	11	3	31	2	5	0	2	0	0	3	6	4	2	0	0	Bacteria; Firmicutes; Clostridia; Clostridiales
339948	sp_1094	0	0	0	0	2	0	4	0	2	0	2	0	0	0	2	0	0	0	0	0	0	Bacteria; Firmicutes; Clostridia; Clostridiales; Lachnospiraceae
340139	sp_0379	0	0	0	0	0	0	0	0	0	0	0	0	0	0	907	11	2	0	0	0	0	Bacteria; Firmicutes; Clostridia; Clostridiales
340189	sp_0468	11	19	215	18	58	32	4	9	31	73	18	0	8	12	14	10	2	2	16	5	6	Bacteria; Firmicutes; Clostridia; Clostridiales; Lachnospiraceae
340261	sp_1038	2	0	0	2	0	2	0	0	2	0	0	2	2	0	0	0	0	0	3	0	0	Bacteria; Firmicutes; Clostridia; Clostridiales; Clostridiaceae; Clostridium
340486	sp_1387	0	0	0	0	0	0	0	0	0	0	0	0	0	0	0	0	2	0	0	0	0	Bacteria; Firmicutes; Clostridia; Clostridiales; Ruminococcaceae
340535	sp_1570	0	0	0	0	0	0	0	0	0	0	2	0	0	0	0	0	0	0	0	0	0	Bacteria; Firmicutes; Clostridia; Clostridiales
340600	sp_0594	15	0	32	14	28	33	0	30	12	43	3	0	0	13	19	2	0	12	3	0	10	Bacteria; Firmicutes; Clostridia; Clostridiales
340761	sp_1274	0	0	0	0	2	0	0	0	2	2	0	0	0	0	0	0	0	0	0	0	0	Bacteria; Firmicutes; Clostridia; Clostridiales; Lachnospiraceae; Roseburia
340794	sp_0564	0	0	0	0	0	0	0	0	0	0	2	0	0	0	0	0	0	2	0	0	0	Bacteria; Firmicutes; Clostridia; Clostridiales; Ruminococcaceae; Ruminococcus
340809	sp_0510	6	0	17	5	14	0	0	14	6	7	14	3	8	0	18	19	142	0	38	0	46	Bacteria; Firmicutes; Clostridia; Clostridiales; Ruminococcaceae
340852	sp_1234	0	0	0	0	0	0	0	0	2	0	0	0	0	0	0	0	0	0	0	0	0	Bacteria; Firmicutes; Clostridia; Clostridiales; Lachnospiraceae
340853	sp_0354	58	16	43	42	58	46	4	76	84	68	26	22	31	42	18	7	5	22	36	4	22	Bacteria; Firmicutes; Clostridia; Clostridiales; Lachnospiraceae
341252	sp_0486	9	10	8	3	12	6	4	34	6	8	11	2	0	2	19	2	0	77	11	59	0	Bacteria; Firmicutes; Clostridia; Clostridiales
341713	sp_0213	164	45	136	68	119	129	21	112	109	213	47	2	52	41	42	46	62	74	32	19	60	Bacteria; Firmicutes; Clostridia; Clostridiales; Ruminococcaceae
341752	sp_0815	0	0	0	0	0	4	0	12	5	6	11	0	6	0	0	4	8	0	0	0	3	Bacteria; Firmicutes; Clostridia; Clostridiales; Lachnospiraceae
342504	sp_0417	14	28	31	12	16	37	13	24	32	20	28	22	58	17	35	8	41	21	22	37	14	Bacteria; Firmicutes; Clostridia; Clostridiales; Clostridiaceae
342844	sp_0138	0	0	0	0	0	0	0	0	0	0	0	106	82	359	17	0	0	0	0	0	0	Bacteria; Firmicutes; Clostridia; Clostridiales; Ruminococcaceae
342887	sp_0897	0	0	0	0	0	0	0	0	0	0	0	0	0	0	7	0	0	9	3	0	0	Bacteria; Firmicutes; Clostridia; Clostridiales; Lachnospiraceae; [Ruminococcus]; gnavus
343030	sp_0857	0	0	4	0	4	2	0	0	0	20	3	0	0	0	0	0	0	0	3	5	7	Bacteria; Firmicutes; Clostridia; Clostridiales; Ruminococcaceae; Oscillospira
343104	sp_0822	3	6	3	0	3	6	0	0	4	3	5	2	3	5	3	0	5	3	0	5	3	Bacteria; Firmicutes; Clostridia; Clostridiales; Clostridiaceae
343140	sp_1571	0	0	0	0	0	0	0	0	2	0	0	0	0	0	0	0	0	0	0	0	0	Bacteria; Firmicutes; Clostridia; Clostridiales; Ruminococcaceae
343264	sp_1429	0	0	0	0	0	0	0	0	0	0	0	0	0	0	0	0	0	3	0	0	0	Bacteria; Firmicutes; Clostridia; Clostridiales
343431	sp_0905	3	4	2	0	0	5	0	0	3	8	2	0	4	0	0	2	0	5	0	5	0	Bacteria; Firmicutes; Bacilli; Lactobacillales; Lactobacillaceae; Lactobacillus; reuteri
343679	sp_1137	0	0	2	0	0	0	0	0	2	0	0	0	0	0	0	0	0	0	0	0	4	Bacteria; Firmicutes; Clostridia; Clostridiales
344101	sp_0748	0	2	0	0	18	0	0	0	0	0	7	0	0	0	9	0	0	9	8	14	3	Bacteria; Firmicutes; Clostridia; Clostridiales; Ruminococcaceae
344133	sp_1572	0	0	0	0	0	0	0	0	0	0	0	0	0	2	0	0	0	0	0	0	0	Bacteria; Firmicutes; Clostridia; Clostridiales; Lachnospiraceae
344154	sp_0877	0	2	0	2	4	2	10	2	4	0	0	0	0	6	0	4	2	0	0	3	3	Bacteria; Bacteroidetes; Bacteroidia; Bacteroidales; Bacteroidaceae; Bacteroides; uniformis
344256	sp_0702	3	0	0	0	2	0	0	0	65	45	0	0	2	0	0	6	0	0	0	0	0	Bacteria; Firmicutes; Clostridia; Clostridiales
344523	sp_0348	0	0	35	0	295	519	47	0	150	0	2	0	0	0	0	0	17	2	2	6	0	Bacteria; Firmicutes; Clostridia; Clostridiales; Ruminococcaceae
344527	sp_0282	64	17	72	40	16	62	13	73	151	83	34	20	15	8	53	29	19	118	19	39	4	Bacteria; Firmicutes; Clostridia; Clostridiales; Ruminococcaceae
344726	sp_0608	15	13	11	8	15	18	2	10	8	29	9	54	22	14	10	0	0	0	28	4	7	Bacteria; Firmicutes; Clostridia; Clostridiales; Lachnospiraceae
344844	sp_1321	0	0	0	0	0	0	0	0	0	2	0	0	0	0	0	0	0	0	0	0	0	Bacteria; Firmicutes; Clostridia; Clostridiales; Clostridiaceae
345063	sp_1573	0	0	0	0	0	0	0	0	0	0	0	0	0	0	2	0	0	0	0	0	0	Bacteria; Firmicutes; Clostridia; Clostridiales
345282	sp_1275	0	0	0	0	0	0	2	0	0	0	0	0	0	0	0	0	2	0	0	0	2	Bacteria; Firmicutes; Clostridia; Clostridiales
345347	sp_0914	5	6	7	0	6	0	0	5	0	0	0	4	3	0	0	0	3	0	0	0	0	Bacteria; Firmicutes; Clostridia; Clostridiales
345709	sp_0591	0	0	0	31	36	0	0	0	0	0	0	0	0	24	0	0	5	24	0	0	0	Bacteria; Firmicutes; Clostridia; Clostridiales; Lachnospiraceae
345913	sp_0602	7	6	5	7	7	4	13	27	13	8	4	7	5	12	3	5	0	6	13	8	7	Bacteria; Firmicutes; Clostridia; Clostridiales; Ruminococcaceae; Oscillospira
346267	sp_0926	0	0	2	0	0	4	4	0	0	0	0	0	3	0	0	0	2	2	0	8	0	Bacteria; Bacteroidetes; Bacteroidia; Bacteroidales; S24-7
346275	sp_0532	7	0	2	4	5	7	0	40	17	41	50	11	21	5	10	20	30	11	14	3	2	Bacteria; Firmicutes; Clostridia; Clostridiales; Lachnospiraceae
346291	sp_1276	0	0	0	4	0	0	0	0	0	0	0	0	0	0	0	0	0	0	2	0	0	Bacteria; Firmicutes; Clostridia; Clostridiales
346570	sp_0407	0	0	0	0	0	0	0	0	0	0	0	0	0	110	4	0	0	0	0	0	0	Bacteria; Firmicutes; Clostridia; Clostridiales
346720	sp_0064	7	3	0	2	2	4	3	4	3	2	3	2	14	0	0	12	3414	10	4	0	3	Bacteria; Firmicutes; Clostridia; Clostridiales; Ruminococcaceae; Ruminococcus
346764	sp_1322	0	2	0	0	0	0	0	0	0	0	0	0	0	0	0	0	0	0	0	0	0	Bacteria; Firmicutes; Clostridia; Clostridiales
346804	sp_0809	2	0	10	4	5	2	0	6	8	0	0	2	0	2	0	2	0	3	2	4	3	Bacteria; Firmicutes; Clostridia; Clostridiales; Ruminococcaceae
347063	sp_1124	3	0	2	0	0	0	0	0	0	0	2	0	0	2	3	0	0	0	0	0	0	Bacteria; Firmicutes; Bacilli; Lactobacillales; Lactobacillaceae; Lactobacillus; reuteri
347189	sp_0866	2	0	2	0	0	0	0	0	0	0	0	3	4	0	0	0	0	3	0	2	0	Bacteria; Firmicutes; Clostridia; Clostridiales
347587	sp_0808	0	0	0	0	0	0	0	0	0	0	0	0	0	0	8	0	5	0	54	0	0	Bacteria; Tenericutes; Mollicutes; RF39
347714	sp_1138	0	0	3	0	0	2	0	0	0	0	0	0	0	0	0	0	0	0	0	0	0	Bacteria; Firmicutes; Clostridia; Clostridiales; Peptostreptococcaceae
347791	sp_0341	33	9	11	25	39	2	0	27	37	28	142	16	3	12	158	9	32	11	34	5	17	Bacteria; Firmicutes; Clostridia; Clostridiales; Ruminococcaceae
347801	sp_1575	0	0	0	0	0	0	0	0	0	2	0	0	0	0	0	0	0	0	0	0	0	Bacteria; Firmicutes; Clostridia; Clostridiales
347908	sp_1107	2	2	0	0	0	0	0	0	6	0	0	0	0	0	0	3	0	0	0	0	0	Bacteria; Firmicutes; Clostridia; Clostridiales; Lachnospiraceae
347933	sp_0946	0	2	0	11	0	0	0	0	0	0	0	0	0	0	4	0	0	4	0	2	0	Bacteria; Firmicutes; Clostridia; Clostridiales
348027	sp_1023	0	2	0	0	3	0	3	2	0	0	0	0	0	2	0	0	0	0	0	3	4	Bacteria; Bacteroidetes; Bacteroidia; Bacteroidales; Bacteroidaceae; Bacteroides; uniformis
348142	sp_0993	0	13	0	0	0	4	0	0	0	0	4	0	0	0	0	0	0	0	2	2	0	Bacteria; Firmicutes; Clostridia; Clostridiales
348272	sp_1576	0	0	0	0	0	0	0	0	0	0	0	0	2	0	0	0	0	0	0	0	0	Bacteria; Firmicutes; Clostridia; Clostridiales; Ruminococcaceae
348336	sp_0188	11	0	52	20	167	45	9	35	0	0	18	0	3	4	17	5	17	44	28	5	0	Bacteria; Firmicutes; Clostridia; Clostridiales
348376	sp_0048	0	130	22	3675	577	68	0	613	0	28	28	0	2	6	354	4	6	1008	540	368	254	Bacteria; Firmicutes; Clostridia; Clostridiales
348404	sp_0099	114	121	40	27	6	36	45	64	216	94	60	441	400	112	87	320	521	411	226	21	151	Bacteria; Firmicutes; Clostridia; Clostridiales
348568	sp_0361	95	36	0	0	113	43	0	38	11	98	35	4	34	66	38	28	18	82	9	13	6	Bacteria; Firmicutes; Clostridia; Clostridiales; Lachnospiraceae
348748	sp_1235	0	0	0	0	0	3	0	0	0	0	2	0	0	0	0	0	0	0	0	0	0	Bacteria; Firmicutes; Clostridia; Clostridiales; Lachnospiraceae
348785	sp_1200	0	0	0	4	0	0	0	0	0	0	0	0	0	0	0	0	0	0	0	0	0	Bacteria; Firmicutes; Clostridia; Clostridiales
348839	sp_0667	3	5	6	3	11	8	3	9	9	4	10	6	7	2	6	8	2	2	6	11	6	Bacteria; Firmicutes; Clostridia; Clostridiales
348863	sp_1125	0	0	0	0	0	0	0	0	0	0	0	0	0	0	0	3	2	0	0	0	0	Bacteria; Firmicutes; Clostridia; Clostridiales; Lachnospiraceae; Coprococcus
348897	sp_0902	0	0	2	5	0	0	4	3	0	0	0	2	0	0	0	0	8	0	0	0	0	Bacteria; Firmicutes; Clostridia; Clostridiales
349036	sp_0014	4683	2646	792	95	2397	2719	432	1484	2339	2345	1950	249	2676	3118	177	586	775	662	1579	471	605	Bacteria; Firmicutes; Clostridia; Clostridiales
349153	sp_0618	0	0	16	9	14	18	3	14	26	11	9	11	10	0	0	2	7	5	3	11	3	Bacteria; Firmicutes; Clostridia; Clostridiales
349246	sp_0695	9	6	2	4	12	0	0	3	0	2	4	0	3	2	5	0	2	7	7	3	0	Bacteria; Firmicutes; Clostridia; Clostridiales; Ruminococcaceae; Oscillospira
349310	sp_0943	0	0	0	0	0	0	0	3	0	0	0	0	2	0	0	0	0	2	0	0	0	Bacteria; Firmicutes; Clostridia; Clostridiales
349713	sp_0824	0	0	4	0	8	0	0	5	0	10	4	0	2	0	2	2	0	0	0	0	0	Bacteria; Firmicutes; Clostridia; Clostridiales; Lachnospiraceae
349798	sp_1095	0	0	4	0	0	0	0	0	4	3	0	0	0	0	0	0	0	0	0	0	0	Bacteria; Firmicutes; Clostridia; Clostridiales; Ruminococcaceae; Oscillospira
349862	sp_0796	0	10	4	2	7	25	0	2	0	0	14	0	0	0	0	0	0	6	2	0	0	Bacteria; Firmicutes; Clostridia; Clostridiales
350127	sp_0540	0	0	5	2	7	0	2	0	0	0	0	0	193	0	0	94	143	0	0	0	0	Bacteria; Firmicutes; Clostridia; Clostridiales
350242	sp_1430	0	0	0	0	0	0	0	0	0	0	0	0	0	0	0	0	0	3	0	0	0	Bacteria; Firmicutes; Bacilli; Lactobacillales; Lactobacillaceae; Lactobacillus
350367	sp_1388	0	0	0	2	0	0	0	0	0	0	0	0	0	0	0	0	0	0	0	0	0	Bacteria; Firmicutes; Clostridia; Clostridiales
350447	sp_0063	402	640	446	1021	312	101	2	1181	0	412	462	40	0	15	172	170	3	376	388	0	268	Bacteria; Firmicutes; Clostridia; Clostridiales; Lachnospiraceae
350759	sp_0871	0	2	15	5	0	0	4	0	9	0	0	0	13	0	0	0	0	0	0	0	2	Bacteria; Firmicutes; Clostridia; Clostridiales; Lachnospiraceae; Blautia
350865	sp_0218	129	0	0	0	0	0	0	13	6	20	34	0	327	48	4	1128	243	35	0	0	0	Bacteria; Firmicutes; Clostridia; Clostridiales; Lachnospiraceae; Lachnospira
351062	sp_0947	0	0	2	0	0	2	0	3	0	2	3	0	0	0	0	0	0	3	3	0	0	Bacteria; Firmicutes; Clostridia; Clostridiales
351063	sp_0994	0	0	6	0	2	2	3	0	4	0	0	0	0	0	0	0	2	0	0	0	0	Bacteria; Firmicutes; Clostridia; Clostridiales; Lachnospiraceae
351292	sp_0938	0	0	0	2	0	0	5	0	0	0	0	0	0	0	2	2	0	2	2	5	0	Bacteria; Bacteroidetes; Bacteroidia; Bacteroidales; Rikenellaceae
351449	sp_1578	0	0	0	0	0	0	0	0	0	0	0	0	0	0	0	2	0	0	0	0	0	Bacteria; Firmicutes; Clostridia; Clostridiales
351593	sp_0312	133	0	0	28	459	13	0	42	0	0	57	0	0	0	0	0	14	329	0	0	0	Bacteria; Firmicutes; Clostridia; Clostridiales
351659	sp_0485	0	0	0	0	0	0	9	10	14	12	16	13	12	23	41	50	91	45	13	6	6	Bacteria; Firmicutes; Clostridia; Clostridiales
351734	sp_0675	7	0	9	0	2	0	0	5	20	14	5	4	19	8	10	11	9	9	8	2	5	Bacteria; Firmicutes; Clostridia; Clostridiales; Lachnospiraceae; [Ruminococcus]; gnavus
351881	sp_0475	53	0	2	0	19	77	0	6	0	0	0	0	0	0	4	0	0	4	0	39	0	Bacteria; Firmicutes; Clostridia; Clostridiales; Lachnospiraceae
351972	sp_0357	36	29	28	66	53	36	38	48	63	37	21	6	22	8	6	54	16	27	12	28	48	Bacteria; Firmicutes; Clostridia; Clostridiales; Dehalobacteriaceae; Dehalobacterium
352008	sp_0624	27	9	0	0	0	0	0	5	0	4	7	4	19	0	7	20	0	0	0	0	0	Bacteria; Firmicutes; Clostridia; Clostridiales; Lachnospiraceae; [Ruminococcus]; gnavus
352049	sp_0221	204	231	261	0	452	269	84	364	0	2	51	58	40	0	7	0	81	0	3	23	0	Bacteria; Firmicutes; Clostridia; Clostridiales
352222	sp_1277	2	0	2	0	0	0	0	0	2	0	0	0	0	0	0	0	0	0	0	0	0	Bacteria; Firmicutes; Clostridia; Clostridiales
352445	sp_0449	8	20	8	16	2	4	2	94	33	161	12	8	20	6	5	8	6	0	13	2	7	Bacteria; Firmicutes; Clostridia; Clostridiales
352559	sp_0971	0	0	0	0	0	0	0	0	0	0	0	0	0	0	5	0	0	0	0	0	0	Bacteria; Firmicutes; Clostridia; Clostridiales; Lachnospiraceae
352612	sp_0277	11	4	140	22	42	82	17	134	19	99	31	42	513	57	22	13	23	12	44	10	33	Bacteria; Firmicutes; Clostridia; Clostridiales
352799	sp_0296	49	528	36	17	33	189	5	12	55	58	10	4	9	10	17	5	2	9	3	12	6	Bacteria; Firmicutes; Clostridia; Clostridiales; Lachnospiraceae
352843	sp_0873	4	12	0	2	0	0	0	0	0	0	0	0	0	0	0	0	0	2	0	3	0	Bacteria; Firmicutes; Clostridia; Clostridiales
353057	sp_0856	0	0	0	0	0	0	0	0	0	0	0	0	0	0	12	2	5	2	3	25	3	Bacteria; Firmicutes; Clostridia; Clostridiales; Ruminococcaceae
353173	sp_1164	0	0	0	0	0	0	0	0	0	0	0	0	0	0	0	0	4	0	0	0	3	Bacteria; Firmicutes; Clostridia; Clostridiales
353982	sp_0172	53	78	99	65	80	81	19	67	190	191	58	48	53	155	136	61	46	76	74	54	48	Bacteria; Firmicutes; Clostridia; Clostridiales; Ruminococcaceae
354032	sp_0307	0	0	264	93	0	0	0	0	353	195	79	0	0	0	0	162	37	85	34	53	27	Bacteria; Firmicutes; Clostridia; Clostridiales
354097	sp_1139	0	0	2	2	0	0	0	0	0	0	0	0	0	2	0	0	0	0	2	0	0	Bacteria; Firmicutes; Clostridia; Clostridiales; Lachnospiraceae
354163	sp_1323	0	3	0	0	0	2	0	0	0	0	0	0	0	0	0	0	0	0	0	0	0	Bacteria; Firmicutes; Clostridia; Clostridiales; Lachnospiraceae
354256	sp_1581	0	2	0	0	0	0	0	0	0	0	0	0	0	0	0	0	0	0	0	0	0	Bacteria; Firmicutes; Bacilli; Lactobacillales; Lactobacillaceae; Lactobacillus; reuteri
354461	sp_0612	0	5	11	5	7	0	25	9	14	4	6	7	61	9	12	3	19	0	6	2	4	Bacteria; Firmicutes; Clostridia; Clostridiales; Lachnospiraceae
355187	sp_0154	15	59	29	50	110	130	184	81	24	5	82	67	735	94	7	82	248	21	48	20	29	Bacteria; Firmicutes; Clostridia; Clostridiales
355291	sp_0898	0	0	0	2	0	0	7	2	0	3	4	5	0	3	2	0	2	0	0	0	7	Bacteria; Bacteroidetes; Bacteroidia; Bacteroidales; Bacteroidaceae; Bacteroides
355344	sp_1108	0	0	0	2	0	0	0	3	0	2	0	0	0	0	0	0	0	2	0	0	0	Bacteria; Firmicutes; Clostridia; Clostridiales
355630	sp_0310	204	7	79	105	109	48	48	75	90	19	14	63	63	25	12	5	4	35	30	2	25	Bacteria; Firmicutes; Clostridia; Clostridiales; Lachnospiraceae
355771	sp_0184	34	391	14	331	522	29	0	56	0	30	35	0	0	0	220	4	2	317	19	36	6	Bacteria; Firmicutes; Clostridia; Clostridiales; Lachnospiraceae
356011	sp_1109	0	0	0	0	0	0	0	0	0	0	0	0	2	0	0	0	0	2	0	0	0	Bacteria; Firmicutes; Clostridia; Clostridiales; Ruminococcaceae; Ruminococcus
356012	sp_0388	7	40	6	60	12	4	0	34	49	171	249	60	0	158	0	0	0	0	0	33	3	Bacteria; Firmicutes; Clostridia; Clostridiales
356073	sp_0088	65	66	1117	200	429	506	276	531	739	86	0	525	861	0	0	463	94	0	0	0	0	Bacteria; Firmicutes; Clostridia; Clostridiales
356144	sp_1433	0	0	0	0	0	0	0	0	0	0	0	0	0	0	3	0	0	0	0	0	0	Bacteria; Firmicutes; Bacilli; Lactobacillales; Lactobacillaceae; Lactobacillus; reuteri
356353	sp_1236	0	0	0	0	0	0	0	0	0	0	0	0	0	0	0	0	0	0	0	2	0	Bacteria; Firmicutes; Clostridia; Clostridiales
356360	sp_1096	0	0	2	0	3	5	0	0	0	0	0	0	0	0	0	0	0	2	0	0	0	Bacteria; Firmicutes; Clostridia; Clostridiales; Lachnospiraceae
356404	sp_0757	0	0	0	0	0	0	0	0	0	0	0	0	0	0	0	0	0	11	13	0	2	Bacteria; Firmicutes; Clostridia; Clostridiales
356405	sp_1583	0	0	0	0	0	0	0	0	0	2	0	0	0	0	0	0	0	0	0	0	0	Bacteria; Firmicutes; Clostridia; Clostridiales; Ruminococcaceae
356454	sp_0995	0	0	0	0	0	0	0	0	0	0	0	0	0	0	0	0	15	0	0	0	0	Bacteria; Firmicutes; Clostridia; Clostridiales; Ruminococcaceae
356529	sp_0834	5	2	6	0	0	4	0	2	2	7	5	4	3	3	6	0	0	7	0	5	2	Bacteria; Firmicutes; Bacilli; Lactobacillales; Lactobacillaceae; Lactobacillus
356550	sp_1584	0	0	0	0	0	0	0	0	0	0	0	0	0	0	0	0	2	0	0	0	0	Bacteria; Firmicutes; Clostridia; Clostridiales; Ruminococcaceae
356590	sp_0975	3	2	3	4	0	0	0	2	0	3	0	0	0	0	0	0	0	0	2	0	0	Bacteria; Firmicutes; Clostridia; Clostridiales; Lachnospiraceae
356657	sp_1585	0	0	0	0	0	0	0	0	2	0	0	0	0	0	0	0	0	0	0	0	0	Bacteria; Firmicutes; Clostridia; Clostridiales; Lachnospiraceae
357028	sp_1586	0	0	0	0	0	0	0	2	0	0	0	0	0	0	0	0	0	0	0	0	0	Bacteria; Firmicutes; Clostridia; Clostridiales; Ruminococcaceae
357312	sp_1587	0	0	0	0	0	0	0	0	2	0	0	0	0	0	0	0	0	0	0	0	0	Bacteria; Firmicutes; Clostridia; Clostridiales; Lachnospiraceae
357412	sp_0917	0	0	0	0	3	10	3	3	2	0	4	5	0	0	0	0	0	0	0	0	2	Bacteria; Firmicutes; Clostridia; Clostridiales; Lachnospiraceae; Roseburia
357471	sp_0827	0	0	0	0	0	0	0	0	0	2	0	0	0	0	0	0	0	0	0	0	0	Bacteria; Firmicutes; Clostridia; Clostridiales
357765	sp_1434	0	0	0	0	0	0	3	0	0	0	0	0	0	0	0	0	0	0	0	0	0	Bacteria; Firmicutes; Clostridia; Clostridiales
358007	sp_1238	0	0	0	0	0	0	0	0	0	0	0	0	0	0	0	0	2	0	0	0	0	Bacteria; Firmicutes; Clostridia; Clostridiales
358143	sp_0698	0	4	3	8	2	0	0	2	7	0	17	12	0	0	4	5	4	0	3	0	0	Bacteria; Firmicutes; Clostridia; Clostridiales; Ruminococcaceae
358439	sp_1165	0	0	0	0	0	0	0	2	0	0	0	0	0	0	0	0	3	0	0	0	0	Bacteria; Firmicutes; Clostridia; Clostridiales
358712	sp_1390	0	0	0	0	0	0	0	0	0	0	0	0	2	0	0	2	0	0	0	0	0	Bacteria; Firmicutes; Clostridia; Clostridiales; Lachnospiraceae
359809	sp_0023	169	345	560	389	479	1475	1977	867	256	493	1019	845	795	346	2062	283	662	322	370	5196	2864	Bacteria; Proteobacteria; Betaproteobacteria; Burkholderiales; Alcaligenaceae; Sutterella
359984	sp_0018	1195	233	664	469	29	42	747	1291	812	1247	3389	1518	1571	638	794	552	1593	625	18	0	0	Bacteria; Firmicutes; Clostridia; Clostridiales; Ruminococcaceae
360015	sp_0276	169	23	15	17	74	52	0	26	5	26	69	35	73	14	45	52	3	9	35	55	11	Bacteria; Firmicutes; Clostridia; Clostridiales; Lachnospiraceae; [Ruminococcus]; gnavus
360238	sp_0111	77	78	391	238	123	123	235	119	501	91	185	196	184	272	314	124	140	102	168	119	192	Bacteria; Firmicutes; Erysipelotrichi; Erysipelotrichales; Erysipelotrichaceae
360315	sp_0257	0	0	0	0	15	10	0	0	0	0	0	185	0	644	119	3	0	400	17	2	0	Bacteria; Firmicutes; Clostridia; Clostridiales
361683	sp_1166	0	2	2	0	0	0	0	0	2	0	0	0	0	0	0	0	2	0	0	0	0	Bacteria; Firmicutes; Clostridia; Clostridiales; Ruminococcaceae
362108	sp_1140	0	0	0	0	0	0	9	0	0	0	2	0	0	0	0	0	0	0	0	0	0	Bacteria; Firmicutes; Clostridia; Clostridiales; Lachnospiraceae; Blautia
362342	sp_1046	0	0	0	0	0	0	0	0	3	0	0	0	0	0	0	0	0	0	0	0	0	Bacteria; Firmicutes; Clostridia; Clostridiales; Ruminococcaceae; Ruminococcus
362947	sp_1141	0	0	4	0	2	0	0	0	0	5	0	0	0	0	0	0	0	0	0	0	0	Bacteria; Firmicutes; Clostridia; Clostridiales; Lachnospiraceae; Roseburia
362997	sp_0760	0	0	0	10	7	0	33	4	10	0	3	0	0	4	2	9	3	0	0	2	11	Bacteria; Bacteroidetes; Bacteroidia; Bacteroidales; Bacteroidaceae; Bacteroides; uniformis
363035	sp_0927	0	0	0	0	0	0	0	0	0	0	0	0	0	0	0	0	0	0	5	4	3	Bacteria; Firmicutes; Clostridia; Clostridiales; Ruminococcaceae
363400	sp_0706	0	0	0	0	0	0	0	0	168	0	0	0	0	0	0	0	0	0	0	0	0	Bacteria; Firmicutes; Clostridia; Clostridiales; Lachnospiraceae
363731	sp_1278	0	0	0	0	0	0	0	0	0	0	0	0	0	0	0	0	0	0	0	6	0	Bacteria; Verrucomicrobia; Verrucomicrobiae; Verrucomicrobiales; Verrucomicrobiaceae; Akkermansia; muciniphila
364029	sp_1590	0	0	0	0	0	0	0	2	0	0	0	0	0	0	0	0	0	0	0	0	0	Bacteria; Bacteroidetes; Bacteroidia; Bacteroidales; Bacteroidaceae; Bacteroides
364034	sp_1055	0	0	0	0	0	2	0	2	4	0	0	0	0	2	0	0	0	5	0	0	0	Bacteria; Firmicutes; Clostridia; Clostridiales; Lachnospiraceae
364179	sp_0007	328	1283	523	2190	1977	1610	6716	2021	1038	424	1122	3725	1529	3140	1060	1800	2223	1461	1639	1987	3735	Bacteria; Bacteroidetes; Bacteroidia; Bacteroidales; Bacteroidaceae; Bacteroides
364736	sp_0596	0	0	79	29	0	0	39	2	44	11	8	0	0	2	0	72	44	0	0	0	0	Bacteria; Firmicutes; Clostridia; Clostridiales
364926	sp_0803	3	0	0	4	3	0	7	2	3	0	0	3	7	3	0	6	4	3	4	8	6	Bacteria; Bacteroidetes; Bacteroidia; Bacteroidales; Bacteroidaceae; Bacteroides
365297	sp_0769	0	0	4	2	5	7	4	6	9	3	6	7	12	0	7	3	0	2	0	0	0	Bacteria; Firmicutes; Clostridia; Clostridiales
366633	sp_0756	0	4	11	2	9	0	0	6	2	7	10	0	0	0	8	4	2	0	10	2	2	Bacteria; Firmicutes; Clostridia; Clostridiales; Ruminococcaceae
367176	sp_1097	0	0	0	0	0	0	0	0	2	0	0	0	0	10	2	0	0	0	0	0	0	Bacteria; Firmicutes; Clostridia; Clostridiales; Ruminococcaceae; Oscillospira
367542	sp_1593	0	0	0	0	0	0	0	0	0	0	0	0	0	0	0	0	0	2	0	0	0	Bacteria; Firmicutes; Clostridia; Clostridiales; Ruminococcaceae; Ruminococcus
368236	sp_0692	0	6	6	2	4	6	0	3	2	8	6	3	9	0	15	0	7	3	10	6	7	Bacteria; Firmicutes; Clostridia; Clostridiales; Ruminococcaceae
368462	sp_0867	0	0	0	0	0	0	0	0	0	0	0	0	0	31	0	0	0	0	0	0	0	Bacteria; Firmicutes; Clostridia; Clostridiales
370086	sp_1594	0	0	0	0	0	0	0	0	0	0	0	0	0	0	0	0	0	0	2	0	0	Bacteria; Firmicutes; Clostridia; Clostridiales; Ruminococcaceae
370809	sp_0236	0	0	10	253	847	4	0	0	19	0	3	0	0	227	233	5	2	2	0	0	0	Bacteria; Firmicutes; Clostridia; Clostridiales; Lachnospiraceae
372146	sp_0978	4	0	0	0	0	2	0	0	3	7	0	0	0	0	2	0	0	2	0	0	0	Bacteria; Firmicutes; Clostridia; Clostridiales; Ruminococcaceae; Oscillospira
372906	sp_0490	13	7	28	4	11	5	2	16	27	34	4	9	112	16	21	18	2	17	8	10	18	Bacteria; Firmicutes; Clostridia; Clostridiales
373909	sp_0136	54	75	64	71	57	86	122	149	103	72	51	192	119	159	52	237	200	242	213	85	97	Bacteria; Firmicutes; Clostridia; Clostridiales; Ruminococcaceae; Oscillospira
374557	sp_0130	5	0	82	114	2	2	0	0	334	301	148	199	615	0	0	0	0	0	0	0	0	Bacteria; Firmicutes; Clostridia; Clostridiales
375106	sp_0151	100	111	35	135	46	83	235	353	59	121	30	138	73	126	90	89	103	97	191	82	127	Bacteria; Firmicutes; Clostridia; Clostridiales; Ruminococcaceae
375892	sp_1595	0	0	2	0	0	0	0	0	0	0	0	0	0	0	0	0	0	0	0	0	0	Bacteria; Firmicutes; Clostridia; Clostridiales
376397	sp_0195	141	52	115	119	47	85	44	131	108	103	34	36	19	37	38	28	16	52	153	123	118	Bacteria; Firmicutes; Clostridia; Clostridiales; Peptococcaceae
376516	sp_1182	0	0	0	0	0	0	0	0	0	0	0	0	3	4	0	0	0	0	0	0	0	Bacteria; Firmicutes; Clostridia; Clostridiales
377756	sp_0482	16	5	22	10	9	12	2	24	21	21	18	10	16	18	23	11	4	25	16	4	13	Bacteria; Firmicutes; Clostridia; Clostridiales; Ruminococcaceae
378273	sp_0232	163	45	158	94	66	84	13	141	185	128	63	64	0	32	25	0	2	302	44	35	23	Bacteria; Firmicutes; Clostridia; Clostridiales
381694	sp_0196	29	30	13	360	178	208	15	29	96	42	25	20	13	95	90	94	136	111	31	147	212	Bacteria; Firmicutes; Clostridia; Clostridiales; Ruminococcaceae; Oscillospira
382220	sp_0119	10	8	37	178	12	2	2	19	14	152	5	17	21	15	5	1155	282	290	36	4	14	Bacteria; Firmicutes; Clostridia; Clostridiales
382721	sp_0372	36	11	8	11	58	47	0	31	0	3	16	0	0	10	52	3	0	24	10	33	35	Bacteria; Firmicutes; Clostridia; Clostridiales; Lachnospiraceae; Coprococcus
382998	sp_0802	0	0	0	0	0	5	0	3	2	0	0	0	0	0	9	0	0	9	0	7	0	Bacteria; Firmicutes; Clostridia; Clostridiales; Ruminococcaceae
383659	sp_0293	8	0	76	39	15	47	70	362	192	124	70	2	2	5	3	343	46	42	32	4	21	Bacteria; Firmicutes; Clostridia; Clostridiales
383971	sp_0062	465	571	712	400	70	962	42	496	169	314	205	188	8	15	218	72	71	449	384	137	292	Bacteria; Firmicutes; Clostridia; Clostridiales; Lachnospiraceae; [Ruminococcus]; gnavus
383992	sp_0317	35	20	30	28	28	22	8	39	39	44	23	26	55	15	28	24	49	65	22	15	13	Bacteria; Firmicutes; Clostridia; Clostridiales
385545	sp_1435	0	0	0	0	0	0	0	0	0	3	0	0	0	0	0	0	0	0	0	0	0	Bacteria; Firmicutes; Clostridia; Clostridiales
387615	sp_0068	438	165	159	105	178	119	111	211	86	373	115	193	110	55	228	276	243	390	158	225	296	Bacteria; Firmicutes; Clostridia; Clostridiales; Ruminococcaceae; Oscillospira
388808	sp_0951	0	0	0	0	0	0	0	0	0	0	0	0	0	0	4	0	0	0	0	0	0	Bacteria; Firmicutes; Clostridia; Clostridiales
389282	sp_1596	0	0	0	0	0	2	0	0	0	0	0	0	0	0	0	0	0	0	0	0	0	Bacteria; Bacteroidetes; Bacteroidia; Bacteroidales; S24-7
389371	sp_0634	0	0	2	0	39	30	5	3	0	7	3	78	0	0	0	0	0	0	0	72	20	Bacteria; Firmicutes; Clostridia; Clostridiales
389529	sp_0458	13	17	15	2	18	33	3	10	17	28	19	9	8	2	19	8	26	14	69	36	29	Bacteria; Firmicutes; Clostridia; Clostridiales; Ruminococcaceae
390497	sp_0418	122	42	25	7	3	3	13	40	15	25	22	69	91	7	40	4	21	49	40	2	7	Bacteria; Firmicutes; Clostridia; Clostridiales; Ruminococcaceae; Oscillospira
390820	sp_1039	2	0	0	0	0	0	0	0	0	0	0	0	0	0	0	0	0	4	0	0	0	Bacteria; Firmicutes; Clostridia; Clostridiales
392918	sp_0928	0	2	0	2	3	0	0	0	0	0	0	0	0	0	2	0	0	0	7	5	5	Bacteria; Firmicutes; Clostridia; Clostridiales; Ruminococcaceae
397363	sp_0149	8	12	172	175	151	370	65	313	266	257	101	17	97	69	35	183	8	51	80	80	26	Bacteria; Firmicutes; Clostridia; Clostridiales; Ruminococcaceae; Oscillospira
397444	sp_0553	36	6	0	0	10	28	0	12	6	26	13	7	13	8	9	0	8	31	20	24	12	Bacteria; Firmicutes; Clostridia; Clostridiales; Ruminococcaceae; Oscillospira
398138	sp_0858	0	0	4	0	4	3	0	2	0	0	0	0	5	4	4	5	0	0	0	0	2	Bacteria; Firmicutes; Clostridia; Clostridiales; Ruminococcaceae
399606	sp_0026	0	0	0	0	0	0	2	0	0	2	0	2	2	0	0	0	0	3	0	0	0	Bacteria; Firmicutes; Clostridia; Clostridiales
400599	sp_0333	11	4	8	8	20	24	2	7	34	18	10	67	43	8	63	18	15	50	30	74	73	Bacteria; Firmicutes; Clostridia; Clostridiales
400739	sp_0254	44	15	95	70	298	50	26	26	122	60	11	14	140	12	9	27	16	17	26	6	17	Bacteria; Firmicutes; Clostridia; Clostridiales; Lachnospiraceae; Dorea
401384	sp_0046	722	136	628	341	305	391	187	679	625	620	226	235	224	216	151	368	234	273	341	104	180	Bacteria; Firmicutes; Clostridia; Clostridiales; Ruminococcaceae; Oscillospira
403497	sp_0440	39	36	43	19	40	45	22	87	24	17	17	21	13	12	6	8	8	13	20	16	28	Bacteria; Firmicutes; Clostridia; Clostridiales; Lachnospiraceae
404691	sp_0589	9	3	31	7	15	10	7	12	10	19	12	4	3	4	14	11	4	19	17	10	13	Bacteria; Firmicutes; Clostridia; Clostridiales; Ruminococcaceae; Ruminococcus
405780	sp_0231	167	59	51	63	31	31	22	63	23	44	38	32	123	163	26	28	120	73	65	5	153	Bacteria; Firmicutes; Clostridia; Clostridiales; Ruminococcaceae; Ruminococcus
406247	sp_0906	0	0	0	0	5	0	0	0	0	0	0	3	0	0	0	4	0	4	2	2	0	Bacteria; Firmicutes; Clostridia; Clostridiales
407963	sp_1110	0	0	0	0	3	0	0	0	0	0	0	0	0	0	0	0	0	2	0	0	0	Bacteria; Firmicutes; Clostridia; Clostridiales; Ruminococcaceae; Oscillospira
408513	sp_0234	31	6	19	54	30	19	24	62	32	53	11	21	21	15	31	35	12	53	285	13	75	Bacteria; Firmicutes; Clostridia; Clostridiales; Ruminococcaceae; Oscillospira
408877	sp_0190	33	54	200	109	1058	295	20	361	5	184	11	11	0	12	17	8	3	36	29	56	48	Bacteria; Firmicutes; Clostridia; Clostridiales
409686	sp_0370	0	0	20	44	0	0	12	90	284	57	0	2	0	8	44	2	27	104	0	0	0	Bacteria; Firmicutes; Clostridia; Clostridiales; Lachnospiraceae; Blautia; producta
409947	sp_0434	63	12	25	17	24	24	6	43	41	36	32	17	23	51	3	22	37	13	7	0	14	Bacteria; Firmicutes; Clostridia; Clostridiales; Lachnospiraceae
410242	sp_0165	17	10	29	23	56	82	6	50	30	40	182	0	2	11	244	35	249	32	209	195	291	Bacteria; Firmicutes; Clostridia; Clostridiales; Christensenellaceae
411254	sp_0355	38	0	220	155	0	25	36	124	110	84	54	5	0	9	10	7	8	28	17	8	10	Bacteria; Firmicutes; Clostridia; Clostridiales; Lachnospiraceae
413275	sp_0015	24	56	3020	936	1230	101	6921	1561	1802	147	111	40	1297	135	20	1105	5306	33	166	208	4902	Bacteria; Firmicutes; Clostridia; Clostridiales
414089	sp_0047	465	115	183	81	260	1031	43	163	243	750	100	454	384	135	430	73	94	742	255	348	142	Bacteria; Firmicutes; Clostridia; Clostridiales; Ruminococcaceae
416286	sp_0202	30	23	49	132	8	0	4	57	20	14	2	4	312	17	10	257	178	177	30	0	3	Bacteria; Firmicutes; Clostridia; Clostridiales; Lachnospiraceae; [Ruminococcus]; gnavus
417981	sp_0672	8	0	21	3	7	8	4	8	13	12	6	3	10	3	8	7	0	5	4	10	4	Bacteria; Firmicutes; Clostridia; Clostridiales; [Mogibacteriaceae]
418334	sp_0546	0	0	2	0	0	0	0	0	0	0	0	7	2	0	3	0	0	120	61	65	6	Bacteria; Firmicutes; Clostridia; Clostridiales
420168	sp_0496	11	6	22	13	21	17	7	17	24	21	13	6	10	4	9	3	5	25	18	6	9	Bacteria; Firmicutes; Clostridia; Clostridiales; Ruminococcaceae; Oscillospira
421538	sp_0083	194	165	139	256	196	244	45	329	539	336	245	171	278	518	180	170	114	295	198	121	134	Bacteria; Firmicutes; Clostridia; Clostridiales; Lachnospiraceae
421893	sp_0094	0	0	0	0	0	0	436	0	0	0	0	308	543	0	11	1399	140	4	0	0	0	Bacteria; Firmicutes; Clostridia; Clostridiales
422283	sp_1436	0	0	0	0	0	0	0	3	0	0	0	0	0	0	0	0	0	0	0	0	0	Bacteria; Firmicutes; Clostridia; Clostridiales; Ruminococcaceae; Oscillospira
422727	sp_0106	131	116	586	266	485	352	182	207	201	245	129	201	0	29	319	7	3	100	136	82	109	Bacteria; Firmicutes; Clostridia; Clostridiales
423830	sp_0016	61	0	2909	856	24	178	208	36	7153	1474	147	1279	3762	0	195	6399	368	423	0	0	0	Bacteria; Firmicutes; Clostridia; Clostridiales
424270	sp_0758	2	2	4	0	0	0	3	2	11	0	4	0	22	3	3	4	3	2	2	3	4	Bacteria; Firmicutes; Clostridia; Clostridiales; Lachnospiraceae; Blautia
427159	sp_0108	0	0	42	235	3	0	27	9	22	0	14	0	6	0	0	0	4	0	6	3	14	Bacteria; Firmicutes; Clostridia; Clostridiales
427219	sp_0038	6	37	48	30	45	1565	25	0	10	3794	0	5	11	13	66	24	13	423	2478	414	586	Bacteria; Firmicutes; Clostridia; Clostridiales
428632	sp_1598	0	0	0	0	0	0	0	0	0	0	0	0	0	0	0	0	0	2	0	0	0	Bacteria; Firmicutes; Clostridia; Clostridiales; Ruminococcaceae; Ruminococcus; flavefaciens
431235	sp_0436	9	21	10	2	8	3	4	18	0	6	16	11	18	19	22	17	34	26	167	35	22	Bacteria; Firmicutes; Clostridia; Clostridiales; Ruminococcaceae
433722	sp_0204	12	38	116	6	5	10	110	413	6	4	475	15	127	11	49	30	98	19	7	3	5	Bacteria; Firmicutes; Clostridia; Clostridiales; Ruminococcaceae
434089	sp_0214	146	25	22	47	46	6	54	55	113	55	28	51	107	31	14	122	20	75	36	5	17	Bacteria; Firmicutes; Clostridia; Clostridiales; Ruminococcaceae
439880	sp_0053	236	260	158	259	294	447	246	440	291	302	133	708	256	270	124	360	260	467	452	201	332	Bacteria; Firmicutes; Clostridia; Clostridiales; Ruminococcaceae; Oscillospira
440840	sp_0453	0	0	0	0	0	0	0	0	0	0	0	6	34	0	7	54	2	4	6	0	3	Bacteria; Firmicutes; Clostridia; Clostridiales
441468	sp_1098	0	0	0	0	2	0	0	0	0	2	0	3	0	0	0	2	0	0	0	0	0	Bacteria; Firmicutes; Clostridia; Clostridiales; Lachnospiraceae
442126	sp_1391	0	0	0	0	0	0	0	4	0	0	0	0	0	0	0	0	0	0	0	0	0	Bacteria; Bacteroidetes; Sphingobacteriia; Sphingobacteriales; Sphingobacteriaceae; Sphingobacterium
443620	sp_0031	278	479	497	235	375	1488	121	669	1001	2984	453	273	819	603	593	387	173	127	192	166	139	Bacteria; Firmicutes; Clostridia; Clostridiales; Ruminococcaceae; Oscillospira
443853	sp_0248	124	2	8	4	3	3	0	8	5	236	4	38	56	10	2	172	11	12	7	4	4	Bacteria; Firmicutes; Clostridia; Clostridiales
444241	sp_0429	0	0	0	0	0	0	0	0	0	7	7	0	0	0	175	3	0	0	172	185	9	Bacteria; Firmicutes; Clostridia; Clostridiales
444271	sp_0548	2	8	15	14	2	9	4	17	11	12	5	4	4	11	11	19	17	29	18	14	4	Bacteria; Firmicutes; Clostridia; Clostridiales; [Mogibacteriaceae]
446135	sp_0141	78	55	64	120	103	118	63	102	185	109	63	130	101	72	80	277	291	97	204	45	113	Bacteria; Firmicutes; Clostridia; Clostridiales; Ruminococcaceae; Oscillospira
446691	sp_0471	0	0	28	52	0	24	0	0	7	20	12	11	27	0	21	6	20	5	38	0	27	Bacteria; Firmicutes; Clostridia; Clostridiales; Ruminococcaceae
447776	sp_0012	164	3	5	4	2	2	514	1729	0	1163	30	374	933	0	802	813	1631	2630	696	615	40	Bacteria; Firmicutes; Clostridia; Clostridiales
449353	sp_0719	0	0	0	0	0	0	0	0	0	0	0	34	0	60	14	0	0	0	0	0	0	Bacteria; Firmicutes; Clostridia; Clostridiales; Dehalobacteriaceae; Dehalobacterium
449417	sp_1111	0	0	0	0	0	0	0	0	0	0	0	0	0	3	0	0	0	3	0	0	0	Bacteria; Firmicutes; Clostridia; Clostridiales; Lachnospiraceae; [Ruminococcus]; gnavus
450047	sp_0191	0	0	0	0	0	0	0	80	0	41	69	0	0	2	7	0	0	234	0	16	0	Bacteria; Firmicutes; Clostridia; Clostridiales; Lachnospiraceae
450399	sp_1239	0	0	0	0	2	0	0	0	0	2	0	0	0	0	0	0	0	0	0	0	0	Bacteria; Firmicutes; Clostridia; Clostridiales
450576	sp_0283	22	22	29	16	65	39	9	22	46	53	118	0	0	0	0	0	0	0	0	0	0	Bacteria; Firmicutes; Clostridia; Clostridiales; Ruminococcaceae
450755	sp_0123	0	4	0	0	282	9	23	4	0	2	52	5	18	530	126	1180	181	91	8	7	3	Bacteria; Firmicutes; Clostridia; Clostridiales
452014	sp_0390	61	0	0	0	55	69	2	9	4	3	57	2	0	0	11	3	0	129	9	44	0	Bacteria; Firmicutes; Clostridia; Clostridiales; Ruminococcaceae; Oscillospira
452592	sp_0189	0	0	0	0	0	0	0	0	4	0	0	0	0	0	0	0	0	0	0	0	0	Bacteria; Firmicutes; Clostridia; Clostridiales
452823	sp_1078	0	3	0	0	0	2	0	0	0	2	0	0	0	3	5	0	0	0	0	0	0	Bacteria; Firmicutes; Bacilli; Lactobacillales; Lactobacillaceae; Lactobacillus
454156	sp_1599	0	0	0	0	0	0	0	0	0	0	0	0	0	0	0	0	0	0	2	0	0	Bacteria; Firmicutes; Clostridia; Clostridiales
457371	sp_0387	10	2	6	3	13	3	0	8	7	5	65	69	82	55	9	45	36	27	12	0	30	Bacteria; Firmicutes; Clostridia; Clostridiales; Lachnospiraceae
457614	sp_0846	0	0	0	0	0	2	0	0	0	0	0	0	0	0	0	0	0	0	0	0	0	Bacteria; Firmicutes; Clostridia; Clostridiales; Lachnospiraceae
458550	sp_0751	14	10	12	8	9	0	2	0	10	4	2	4	5	4	2	0	2	6	3	0	2	Bacteria; Firmicutes; Clostridia; Clostridiales
459276	sp_0008	4322	2348	2785	2710	3237	1162	1409	3983	6	1967	1944	1401	1047	1734	1219	3162	2391	2703	1970	2117	694	Bacteria; Firmicutes; Clostridia; Clostridiales
460611	sp_0057	172	447	345	618	1078	398	13	54	97	848	154	14	0	8	49	18	10	27	631	68	723	Bacteria; Firmicutes; Clostridia; Clostridiales
461487	sp_0065	196	183	176	316	46	165	100	172	499	152	243	713	599	540	319	181	663	443	716	54	229	Bacteria; Firmicutes; Clostridia; Clostridiales
461795	sp_0132	44	76	21	44	67	12	0	0	13	74	7	127	6	8	163	21	111	338	659	274	605	Bacteria; Firmicutes; Clostridia; Clostridiales; Ruminococcaceae; Oscillospira
462585	sp_0011	480	696	815	911	537	791	2076	1774	1431	888	2827	1471	3316	1934	2406	608	2204	1214	1449	1118	1182	Bacteria; Firmicutes; Clostridia; Clostridiales; Lachnospiraceae
462764	sp_0511	14	9	19	11	16	23	7	16	26	18	9	10	25	2	11	24	9	28	20	12	13	Bacteria; Firmicutes; Clostridia; Clostridiales; Ruminococcaceae; Ruminococcus
462832	sp_0899	2	0	0	3	3	2	0	0	0	0	3	0	0	0	0	0	0	0	2	3	0	Bacteria; Firmicutes; Clostridia; Clostridiales; Ruminococcaceae; Ruminococcus
463794	sp_0597	8	6	8	0	4	13	0	0	2	14	13	20	5	12	10	3	0	2	7	11	12	Bacteria; Firmicutes; Bacilli; Lactobacillales; Lactobacillaceae; Lactobacillus
466811	sp_0182	42	9	163	69	25	35	14	104	21	138	31	66	59	22	27	84	42	357	61	26	19	Bacteria; Firmicutes; Clostridia; Clostridiales
468313	sp_0210	36	3	216	15	147	78	22	42	240	175	82	3	43	22	51	62	13	39	25	101	26	Bacteria; Firmicutes; Clostridia; Clostridiales; Lachnospiraceae
509709	sp_0952	9	4	3	2	0	0	0	0	0	5	0	0	0	0	0	2	0	0	0	0	0	Bacteria; Firmicutes; Clostridia; Clostridiales; Lachnospiraceae
510070	sp_0177	147	31	260	23	117	33	36	158	115	234	74	144	134	47	66	53	34	44	27	33	71	Bacteria; Firmicutes; Clostridia; Clostridiales; Ruminococcaceae; Oscillospira
510286	sp_0790	12	0	10	4	20	11	6	12	10	5	0	0	0	0	0	0	0	2	3	0	0	Bacteria; Firmicutes; Clostridia; Clostridiales; Lachnospiraceae
511234	sp_0931	7	4	0	0	0	0	0	0	0	0	0	0	0	13	5	0	0	0	0	0	0	Bacteria; Firmicutes; Clostridia; Clostridiales
512114	sp_1601	0	0	0	0	0	0	0	0	0	0	0	0	0	0	0	0	2	0	0	0	0	Bacteria; Firmicutes; Clostridia; Clostridiales; Ruminococcaceae
513440	sp_0791	0	0	0	0	0	0	0	0	0	0	0	0	0	0	0	0	0	42	0	0	0	Bacteria; Firmicutes; Clostridia; Clostridiales; Lachnospiraceae
513445	sp_0051	76	610	111	224	402	157	232	228	147	296	270	443	311	650	417	496	211	175	439	588	1061	Bacteria; Bacteroidetes; Bacteroidia; Bacteroidales; Bacteroidaceae; Bacteroides
515883	sp_1602	0	0	2	0	0	0	0	0	0	0	0	0	0	0	0	0	0	0	0	0	0	Bacteria; Firmicutes; Clostridia; Clostridiales; Ruminococcaceae
517583	sp_0735	0	3	18	8	4	3	3	4	0	5	7	0	9	2	5	4	0	3	2	3	11	Bacteria; Firmicutes; Clostridia; Clostridiales
518613	sp_1325	0	0	0	0	0	5	0	0	0	0	0	0	0	0	0	0	0	0	0	0	0	Bacteria; Firmicutes; Clostridia; Clostridiales; Lachnospiraceae
519290	sp_1142	0	0	0	0	0	0	0	0	0	0	2	0	0	0	2	0	0	0	0	7	0	Bacteria; Actinobacteria; Actinobacteria; Bifidobacteriales; Bifidobacteriaceae; Bifidobacterium; pseudolongum
519763	sp_0164	5	5	4	40	7	8	5	7	12	7	0	5	81	5	358	33	247	63	201	21	19	Bacteria; Firmicutes; Clostridia; Clostridiales; Ruminococcaceae; Oscillospira
520931	sp_0260	52	112	79	57	75	115	22	99	31	72	24	41	156	50	79	42	7	57	41	22	54	Bacteria; Firmicutes; Clostridia; Clostridiales; Ruminococcaceae; Oscillospira
521792	sp_0918	0	0	2	0	0	0	0	0	0	0	0	0	0	0	0	2	7	0	0	0	3	Bacteria; Firmicutes; Clostridia; Clostridiales
522961	sp_0577	3	0	3	0	30	28	0	0	0	0	0	65	2	0	0	0	105	0	0	105	0	Bacteria; Firmicutes; Clostridia; Clostridiales
523099	sp_1143	0	0	0	0	0	0	0	0	0	0	0	0	5	0	0	4	0	0	0	0	0	Bacteria; Firmicutes; Clostridia; Clostridiales
523244	sp_1183	0	0	0	0	0	0	0	2	0	2	0	3	0	0	0	0	0	0	0	0	0	Bacteria; Firmicutes; Clostridia; Clostridiales; Ruminococcaceae
523811	sp_0525	364	116	0	0	0	0	0	0	0	0	0	0	0	0	0	0	0	0	2	0	0	Bacteria; Firmicutes; Clostridia; Clostridiales; Lachnospiraceae
524111	sp_1027	0	0	0	6	0	0	0	0	0	0	0	0	0	0	0	0	0	0	0	0	0	Bacteria; Firmicutes; Clostridia; Clostridiales
524515	sp_0382	66	35	38	52	69	27	2	31	36	19	10	16	25	36	29	48	18	23	51	8	28	Bacteria; Firmicutes; Clostridia; Clostridiales
525474	sp_1126	0	0	0	2	0	3	0	0	0	0	0	0	0	0	0	0	0	0	0	0	0	Bacteria; Firmicutes; Clostridia; Clostridiales; Lachnospiraceae
527413	sp_1240	0	0	0	0	0	2	0	0	0	3	2	0	0	0	0	0	0	0	0	0	0	Bacteria; Firmicutes; Clostridia; Clostridiales
527709	sp_0076	52	130	374	435	166	114	122	316	52	138	586	61	439	88	185	156	180	148	82	250	375	Bacteria; Firmicutes; Clostridia; Clostridiales; Lachnospiraceae
527762	sp_1604	0	0	0	0	0	0	0	0	0	0	0	2	0	0	0	0	0	0	0	0	0	Bacteria; Cyanobacteria; 4C0d-2; YS2
529180	sp_1184	0	0	0	0	0	0	2	4	3	0	0	0	0	0	0	0	0	0	0	0	0	Bacteria; Firmicutes; Clostridia; Clostridiales; Lachnospiraceae; Coprococcus
531052	sp_1605	0	0	0	0	0	0	0	0	0	0	0	0	2	0	0	0	0	0	0	0	0	Bacteria; Firmicutes; Clostridia; Clostridiales; Lachnospiraceae; Coprococcus
532235	sp_0561	3	205	0	0	13	0	0	31	0	0	0	0	0	0	5	5	2	3	23	3	9	Bacteria; Firmicutes; Clostridia; Clostridiales; Lachnospiraceae
532384	sp_1241	0	0	0	0	0	0	4	0	3	0	0	0	0	0	0	0	0	0	0	0	0	Bacteria; Firmicutes; Clostridia; Clostridiales; Ruminococcaceae
534042	sp_0810	8	3	13	0	0	9	0	2	0	5	3	2	3	0	8	0	0	5	0	4	4	Bacteria; Firmicutes; Clostridia; Clostridiales; Peptostreptococcaceae
534926	sp_0135	221	125	250	127	134	68	142	214	8	7	88	385	170	188	156	9	625	45	262	311	349	Bacteria; Firmicutes; Clostridia; Clostridiales; Lachnospiraceae; Anaerostipes
534957	sp_1280	0	0	0	0	0	0	0	0	0	0	0	0	0	0	2	0	0	0	0	0	0	Bacteria; Firmicutes; Clostridia; Clostridiales
535399	sp_1079	0	0	0	0	0	15	0	0	0	0	0	0	0	0	0	0	0	0	0	0	0	Bacteria; Firmicutes; Clostridia; Clostridiales; Ruminococcaceae; Oscillospira
535601	sp_0749	0	0	0	0	0	0	4	17	23	12	9	4	2	13	16	17	4	0	8	0	3	Bacteria; Firmicutes; Clostridia; Clostridiales
537290	sp_0874	0	0	0	0	0	0	0	0	0	0	13	0	0	0	0	0	6	0	0	0	0	Bacteria; Proteobacteria; Gammaproteobacteria; Enterobacteriales; Enterobacteriaceae
538223	sp_0562	43	15	23	0	0	11	0	3	11	30	26	9	26	31	41	7	0	10	4	18	10	Bacteria; Firmicutes; Bacilli; Lactobacillales; Lactobacillaceae; Lactobacillus
538247	sp_0684	2	2	3	13	11	2	10	10	13	2	5	3	7	0	10	5	11	13	12	3	0	Bacteria; Actinobacteria; Actinobacteria; Actinomycetales; Micrococcaceae; Rothia; dentocariosa
538947	sp_0793	0	0	11	0	0	0	0	0	10	0	0	0	36	0	0	13	24	0	0	0	0	Bacteria; Firmicutes; Clostridia; Clostridiales; Lachnospiraceae; Blautia
539328	sp_0055	2	0	0	0	0	0	0	0	0	1461	4111	0	0	0	0	561	1539	9	0	0	0	Bacteria; Firmicutes; Clostridia; Clostridiales; Ruminococcaceae; Ruminococcus
539581	sp_0919	2	6	7	0	4	3	2	0	2	0	5	7	0	0	0	0	0	0	0	0	0	Bacteria; Firmicutes; Erysipelotrichi; Erysipelotrichales; Erysipelotrichaceae; [Eubacterium]; dolichum
539688	sp_1606	0	0	0	0	0	2	0	0	0	0	0	0	0	0	0	0	0	0	0	0	0	Bacteria; Firmicutes; Clostridia; Clostridiales
540086	sp_1127	2	0	2	0	0	2	0	0	0	0	0	0	0	0	2	0	0	0	0	0	0	Bacteria; Firmicutes; Clostridia; Clostridiales; Clostridiaceae
542096	sp_1607	0	0	0	0	0	0	0	0	2	0	0	0	0	0	0	0	0	0	0	0	0	Bacteria; Firmicutes; Clostridia; Clostridiales; Lachnospiraceae
542417	sp_0844	3	0	3	0	0	2	0	0	0	2	0	0	3	0	8	2	4	0	0	7	0	Bacteria; Firmicutes; Clostridia; Clostridiales
542934	sp_0670	0	0	6	7	0	0	37	0	141	0	0	0	0	30	3	0	0	0	0	0	0	Bacteria; Firmicutes; Erysipelotrichi; Erysipelotrichales; Erysipelotrichaceae
543942	sp_1326	0	0	0	0	0	0	3	0	0	0	0	0	0	0	0	0	0	0	0	2	0	Bacteria; Proteobacteria; Gammaproteobacteria; Pseudomonadales; Moraxellaceae; Acinetobacter
544896	sp_1201	0	0	0	0	8	0	0	0	0	0	0	0	0	0	0	0	0	0	0	0	0	Bacteria; Firmicutes; Clostridia; Clostridiales; Lachnospiraceae
545038	sp_0985	4	4	5	0	0	0	0	0	0	2	0	0	0	0	0	3	2	2	0	0	2	Bacteria; Firmicutes; Clostridia; Clostridiales; Peptostreptococcaceae
546876	sp_0849	0	0	0	0	5	0	0	0	52	0	0	0	0	4	0	0	0	0	0	0	0	Bacteria; Firmicutes; Clostridia; Clostridiales; Lachnospiraceae
549635	sp_0639	0	5	9	0	7	6	109	0	38	4	9	0	12	0	2	0	0	0	3	3	3	Bacteria; Firmicutes; Clostridia; Clostridiales; Lachnospiraceae; Blautia
553352	sp_1608	0	0	0	0	0	0	0	0	0	0	0	0	0	0	0	0	0	2	0	0	0	Bacteria; Firmicutes; Bacilli; Lactobacillales; Lactobacillaceae; Lactobacillus
554304	sp_1609	0	0	0	0	0	0	0	0	0	0	0	0	0	0	0	0	0	0	0	2	0	Bacteria; Firmicutes; Clostridia; Clostridiales; Ruminococcaceae; Ruminococcus; flavefaciens
554372	sp_1610	0	0	0	0	0	0	0	0	0	0	0	0	0	0	0	2	0	0	0	0	0	Bacteria; Firmicutes; Clostridia; Clostridiales; Ruminococcaceae; Oscillospira
555101	sp_0986	0	2	0	0	0	0	0	0	0	3	0	0	2	0	0	2	2	0	0	0	0	Bacteria; Firmicutes; Clostridia; Clostridiales; Ruminococcaceae
555445	sp_1611	0	0	0	0	0	0	0	0	0	0	0	0	2	0	0	0	0	0	0	0	0	Bacteria; Firmicutes; Clostridia; Clostridiales
555945	sp_0581	16	24	45	5	3	24	2	12	16	37	8	4	8	6	21	2	9	23	0	13	14	Bacteria; Firmicutes; Clostridia; Clostridiales; Clostridiaceae
558420	sp_0881	0	0	3	0	0	0	13	0	6	0	0	0	2	0	0	2	6	0	0	0	2	Bacteria; Firmicutes; Clostridia; Clostridiales; Ruminococcaceae
558444	sp_0980	0	5	0	0	0	9	3	0	0	0	4	0	6	0	0	0	0	0	0	0	0	Bacteria; Firmicutes; Clostridia; Clostridiales; Lachnospiraceae
558599	sp_0583	0	0	74	0	0	3	182	34	11	0	3	0	0	0	0	0	40	0	0	0	2	Bacteria; Firmicutes; Clostridia; Clostridiales; Ruminococcaceae
560336	sp_1168	0	2	0	0	0	0	2	0	0	0	0	0	0	0	0	0	0	0	2	0	4	Bacteria; Bacteroidetes; Bacteroidia; Bacteroidales; Bacteroidaceae; Bacteroides
560906	sp_1612	0	0	0	0	0	0	0	0	0	0	0	0	2	0	0	0	0	0	0	0	0	Bacteria; Firmicutes; Clostridia; Clostridiales
561193	sp_0152	0	0	0	0	0	0	0	0	691	559	345	412	1371	0	0	0	0	0	0	0	0	Bacteria; Firmicutes; Clostridia; Clostridiales
561312	sp_0976	0	0	0	0	0	0	3	0	0	0	0	0	0	0	0	6	2	0	0	0	0	Bacteria; Firmicutes; Clostridia; Clostridiales; Lachnospiraceae
562038	sp_0090	34	8	535	831	24	49	0	0	5	3	0	805	1107	5	114	666	194	89	0	7	0	Bacteria; Firmicutes; Clostridia; Clostridiales; Lachnospiraceae; Roseburia
562084	sp_1437	0	0	0	0	0	0	0	3	0	0	0	0	0	0	0	0	0	0	0	0	0	Bacteria; Proteobacteria; Gammaproteobacteria; Pseudomonadales; Moraxellaceae; Acinetobacter
562376	sp_0761	6	2	2	0	4	4	7	0	4	4	8	4	8	0	5	2	12	2	2	0	0	Bacteria; Firmicutes; Clostridia; Clostridiales; Lachnospiraceae; Dorea
563086	sp_1202	0	2	0	0	0	0	0	0	0	2	0	0	0	2	0	0	0	0	0	0	0	Bacteria; Firmicutes; Clostridia; Clostridiales; Lachnospiraceae; [Ruminococcus]
563572	sp_0734	6	7	9	3	5	5	0	5	8	10	3	0	4	7	6	5	3	5	2	2	4	Bacteria; Firmicutes; Clostridia; Clostridiales; Lachnospiraceae
564188	sp_0785	16	2	8	0	3	12	0	2	15	10	0	0	8	0	0	3	0	2	0	0	0	Bacteria; Firmicutes; Clostridia; Clostridiales; Lachnospiraceae; Dorea
564806	sp_0850	0	0	0	0	0	0	6	0	0	0	0	0	4	2	4	10	0	8	2	0	0	Bacteria; Firmicutes; Clostridia; Clostridiales
565357	sp_1144	0	0	2	0	0	0	0	0	4	0	0	0	2	0	0	0	0	0	0	0	0	Bacteria; Firmicutes; Clostridia; Clostridiales
566022	sp_0935	0	2	2	4	0	0	0	4	0	0	3	0	0	0	2	0	0	2	2	0	2	Bacteria; Firmicutes; Clostridia; Clostridiales
566899	sp_0032	4	584	200	484	465	722	75	372	75	130	66	118	442	64	1077	211	23	21	3607	1091	1352	Bacteria; Firmicutes; Clostridia; Clostridiales; Ruminococcaceae
567715	sp_0730	0	0	4	0	4	0	127	0	10	0	0	0	0	0	0	0	0	0	0	0	0	Bacteria; Firmicutes; Clostridia; Clostridiales; Lachnospiraceae
568952	sp_1024	0	3	0	2	7	3	0	0	0	0	0	0	0	0	0	0	0	0	0	0	0	Bacteria; Firmicutes; Clostridia; Clostridiales
569017	sp_1282	0	0	0	0	0	0	0	2	0	0	0	0	0	0	0	0	2	0	0	0	0	Bacteria; Firmicutes; Clostridia; Clostridiales; Ruminococcaceae
569581	sp_0655	0	0	0	0	0	0	0	0	0	0	0	0	0	0	0	0	0	133	0	0	0	Bacteria; Firmicutes; Clostridia; Clostridiales
569818	sp_0907	0	0	0	0	0	0	0	0	0	0	0	0	0	0	0	0	0	3	0	0	0	Bacteria; Firmicutes; Clostridia; Clostridiales
570507	sp_1438	0	0	0	0	0	0	0	0	3	0	0	0	0	0	0	0	0	0	0	0	0	Bacteria; Firmicutes; Clostridia; Clostridiales; Lachnospiraceae; Blautia
571178	sp_0040	215	16	289	282	3208	3542	3	400	8	36	823	0	2	12	454	31	63	331	182	0	0	Bacteria; Firmicutes; Clostridia; Clostridiales; Lachnospiraceae
574038	sp_0328	59	26	6	48	119	116	4	216	0	45	57	27	25	98	15	9	0	12	32	7	29	Bacteria; Firmicutes; Clostridia; Clostridiales
574689	sp_0397	38	17	56	96	3	11	18	79	76	35	23	9	18	27	9	21	9	17	26	11	22	Bacteria; Firmicutes; Clostridia; Clostridiales; Lachnospiraceae
575261	sp_0794	3	0	7	4	0	2	0	0	16	6	0	13	5	10	12	0	4	6	2	0	2	Bacteria; Firmicutes; Clostridia; Clostridiales; Lachnospiraceae
576712	sp_0043	235	425	431	347	375	242	271	584	287	332	684	289	389	184	543	220	411	380	613	399	340	Bacteria; Firmicutes; Clostridia; Clostridiales; Ruminococcaceae
577170	sp_0001	5970	20233	5505	15663	13961	10439	29096	13337	6737	6682	11233	17272	11171	16786	10247	21336	15529	7134	17328	13681	16544	Bacteria; Bacteroidetes; Bacteroidia; Bacteroidales; Bacteroidaceae; Bacteroides
577406	sp_0600	10	6	4	0	5	14	0	3	21	14	9	15	51	14	5	14	0	10	0	4	0	Bacteria; Firmicutes; Clostridia; Clostridiales; Lachnospiraceae; Dorea
577512	sp_0356	9	6	43	48	11	56	14	5	15	6	2	17	40	36	22	17	225	124	36	2	14	Bacteria; Firmicutes; Clostridia; Clostridiales
578649	sp_0799	9	6	0	8	9	11	2	14	0	0	2	0	0	0	0	0	0	0	0	0	0	Bacteria; Firmicutes; Clostridia; Clostridiales; Lachnospiraceae
578960	sp_1066	0	0	0	0	0	0	0	0	0	0	2	0	0	3	3	2	0	3	0	0	0	Bacteria; Firmicutes; Clostridia; Clostridiales; Lachnospiraceae
579278	sp_1203	0	0	0	0	0	0	2	0	0	0	0	0	2	0	0	0	0	0	0	0	0	Bacteria; Firmicutes; Clostridia; Clostridiales; Ruminococcaceae
579293	sp_1013	0	0	0	0	0	0	0	0	2	2	3	0	2	0	0	0	0	0	0	0	0	Bacteria; Firmicutes; Clostridia; Clostridiales; Ruminococcaceae
579366	sp_0504	19	9	0	0	23	18	10	16	12	10	44	16	21	15	23	6	13	6	36	13	18	Bacteria; Firmicutes; Clostridia; Clostridiales; Ruminococcaceae
579541	sp_0981	0	3	0	0	3	2	4	2	6	4	3	0	0	0	0	0	0	0	0	0	0	Bacteria; Firmicutes; Clostridia; Clostridiales; Ruminococcaceae
580044	sp_0908	2	7	0	5	18	3	0	0	0	6	0	0	0	0	0	0	0	0	2	0	0	Bacteria; Firmicutes; Clostridia; Clostridiales; Lachnospiraceae
580087	sp_1047	0	0	2	3	0	0	4	0	0	0	0	0	2	3	0	0	0	0	0	0	2	Bacteria; Firmicutes; Clostridia; Clostridiales; Lachnospiraceae; Blautia
580090	sp_0074	0	0	695	234	37	143	0	0	642	354	157	27	454	345	164	265	65	153	50	117	38	Bacteria; Firmicutes; Clostridia; Clostridiales
580121	sp_1169	0	0	0	0	0	0	0	0	0	0	2	0	0	0	0	0	5	0	0	0	0	Bacteria; Firmicutes; Clostridia; Clostridiales; Ruminococcaceae
580521	sp_0892	3	0	4	0	2	0	0	0	4	7	0	2	2	3	3	0	0	2	0	0	3	Bacteria; Firmicutes; Clostridia; Clostridiales; Ruminococcaceae
580629	sp_0929	0	2	0	3	0	0	2	0	0	3	0	2	0	2	3	2	0	0	0	2	11	Bacteria; Bacteroidetes; Bacteroidia; Bacteroidales; Bacteroidaceae; Bacteroides
580907	sp_0383	13	22	8	36	14	0	5	11	43	22	73	65	2	3	33	26	22	7	15	5	6	Bacteria; Firmicutes; Clostridia; Clostridiales; Ruminococcaceae
581014	sp_0419	33	29	40	26	28	45	6	26	43	39	22	42	26	22	13	10	8	16	13	12	9	Bacteria; Firmicutes; Clostridia; Clostridiales; Lachnospiraceae
581463	sp_1393	0	0	0	0	0	0	0	0	0	2	0	0	0	0	0	0	0	0	0	0	0	Bacteria; Firmicutes; Clostridia; Clostridiales; Ruminococcaceae
581474	sp_0239	0	0	0	0	0	0	0	0	0	0	0	62	182	5	31	302	645	765	0	0	0	Bacteria; Firmicutes; Bacilli; Lactobacillales; Lactobacillaceae; Lactobacillus
581933	sp_0987	2	3	0	0	0	0	0	0	0	0	0	2	0	0	0	0	0	2	3	2	3	Bacteria; Firmicutes; Clostridia; Clostridiales; Ruminococcaceae; Oscillospira
582184	sp_0676	0	0	12	0	0	0	4	0	30	3	2	14	91	8	0	2	2	0	0	0	0	Bacteria; Firmicutes; Clostridia; Clostridiales; Lachnospiraceae
583117	sp_0013	394	1179	371	3069	1562	951	1320	716	974	459	1176	1030	382	2127	1679	1040	1511	1944	1746	2162	1344	Bacteria; Bacteroidetes; Bacteroidia; Bacteroidales; Bacteroidaceae; Bacteroides
583266	sp_1614	0	2	0	0	0	0	0	0	0	0	0	0	0	0	0	0	0	0	0	0	0	Bacteria; Firmicutes; Clostridia; Clostridiales
583958	sp_1067	0	0	2	0	0	0	0	0	0	0	0	2	4	0	0	0	0	0	0	3	3	Bacteria; Firmicutes; Clostridia; Clostridiales
584137	sp_0338	23	21	72	30	477	73	15	31	24	7	4	106	0	70	0	0	0	7	6	5	7	Bacteria; Firmicutes; Clostridia; Clostridiales; Lachnospiraceae
584263	sp_0359	0	0	0	0	0	0	0	0	4	6	0	0	0	3	43	212	8	18	0	0	0	Bacteria; Firmicutes; Clostridia; Clostridiales
584765	sp_0635	13	5	5	24	14	8	0	5	8	15	9	6	8	12	6	0	5	5	3	3	4	Bacteria; Firmicutes; Clostridia; Clostridiales
585480	sp_0732	0	0	20	0	0	0	0	4	3	0	0	2	11	4	6	0	17	0	0	4	3	Bacteria; Firmicutes; Clostridia; Clostridiales; Lachnospiraceae; Anaerostipes
586453	sp_0582	9	0	5	7	7	11	10	22	8	15	18	6	5	2	16	10	11	10	17	11	9	Bacteria; Firmicutes; Clostridia; Clostridiales; Christensenellaceae
588197	sp_0020	2194	1895	1128	30	451	1973	72	543	1214	1980	2555	540	1554	1245	2393	465	586	1117	489	1024	893	Bacteria; Firmicutes; Bacilli; Lactobacillales; Lactobacillaceae; Lactobacillus
589071	sp_0004	370	2085	597	3895	2184	853	12871	2171	3104	944	1189	697	757	4327	953	3880	1553	448	900	2511	5304	Bacteria; Bacteroidetes; Bacteroidia; Bacteroidales; Bacteroidaceae; Bacteroides; uniformis
589277	sp_0122	66	230	91	174	180	138	301	154	129	76	94	159	120	160	92	222	174	88	187	185	157	Bacteria; Bacteroidetes; Bacteroidia; Bacteroidales; Bacteroidaceae; Bacteroides
589282	sp_1616	0	0	0	0	0	0	0	0	0	0	0	0	0	2	0	0	0	0	0	0	0	Bacteria; Firmicutes; Clostridia; Clostridiales; Ruminococcaceae; Faecalibacterium; prausnitzii
591405	sp_0286	6	2	503	3	0	9	0	25	502	2	31	191	2	6	0	8	7	18	13	202	11	Bacteria; Firmicutes; Clostridia; Clostridiales
591818	sp_0967	0	0	9	0	0	0	0	0	11	0	0	0	0	0	0	0	0	0	0	0	0	Bacteria; Firmicutes; Clostridia; Clostridiales; Ruminococcaceae
592170	sp_1617	0	0	0	0	0	0	2	0	0	0	0	0	0	0	0	0	0	0	0	0	0	Bacteria; Firmicutes; Clostridia; Clostridiales; Lachnospiraceae
592572	sp_1056	0	0	0	0	9	4	0	0	0	2	0	0	2	0	0	0	0	0	0	0	0	Bacteria; Firmicutes; Clostridia; Clostridiales; Lachnospiraceae
592866	sp_0722	0	0	4	2	5	0	39	8	89	5	0	0	2	0	0	0	0	0	0	0	0	Bacteria; Firmicutes; Clostridia; Clostridiales; Lachnospiraceae; [Ruminococcus]
592933	sp_0656	0	5	59	25	13	9	0	0	0	0	3	0	0	4	51	0	0	0	37	11	9	Bacteria; Firmicutes; Clostridia; Clostridiales; Lachnospiraceae; Dorea
593043	sp_0061	48	62	617	3	235	422	566	613	190	49	549	0	20	4	312	103	227	478	100	2943	62	Bacteria; Verrucomicrobia; Verrucomicrobiae; Verrucomicrobiales; Verrucomicrobiaceae; Akkermansia; muciniphila
593733	sp_1618	0	0	0	0	0	2	0	0	0	0	0	0	0	0	0	0	0	0	0	0	0	Bacteria; Firmicutes; Clostridia; Clostridiales
607540	sp_0716	0	0	63	0	0	0	0	0	0	0	0	0	0	0	0	0	0	0	0	0	0	Bacteria; Firmicutes; Clostridia; Clostridiales; Lachnospiraceae; Coprococcus
608244	sp_0117	107	131	204	181	176	139	174	156	306	105	326	236	264	149	11	74	151	2	6	69	242	Bacteria; Firmicutes; Clostridia; Clostridiales; Ruminococcaceae; Ruminococcus
609589	sp_1327	0	0	0	0	0	0	0	0	0	0	0	0	0	0	0	0	3	0	0	0	0	Bacteria; Firmicutes; Clostridia; Clostridiales
628218	sp_0371	15	93	3	65	187	89	0	9	0	0	10	0	2	14	35	8	2	33	7	200	39	Bacteria; Firmicutes; Clostridia; Clostridiales
631564	sp_0109	72	79	465	849	158	90	26	133	1406	484	14	27	16	0	4	0	29	0	0	8	0	Bacteria; Firmicutes; Clostridia; Clostridiales
631764	sp_0872	0	2	10	0	3	3	0	0	3	0	0	0	0	0	3	0	0	7	3	7	0	Bacteria; Actinobacteria; Coriobacteriia; Coriobacteriales; Coriobacteriaceae; Adlercreutzia
634449	sp_0649	10	11	9	4	8	13	5	11	13	7	11	0	12	14	0	3	2	0	6	0	4	Bacteria; Firmicutes; Clostridia; Clostridiales; Lachnospiraceae
640641	sp_1621	0	0	0	0	0	0	0	0	0	0	0	0	0	0	0	0	0	2	0	0	0	Bacteria; Proteobacteria; Gammaproteobacteria; Pseudomonadales; Pseudomonadaceae; Pseudomonas
640999	sp_0512	7	125	0	7	0	2	0	233	41	2	34	7	0	0	18	0	0	0	6	0	0	Bacteria; Firmicutes; Clostridia; Clostridiales
641783	sp_0156	2	0	143	0	0	37	48	162	42	127	309	4	23	12	21	27	449	0	0	0	0	Bacteria; Firmicutes; Clostridia; Clostridiales; Ruminococcaceae
647215	sp_0982	0	0	2	0	0	5	0	0	16	0	0	0	0	0	0	0	0	0	0	0	0	Bacteria; Firmicutes; Clostridia; Clostridiales; Ruminococcaceae; Oscillospira
649107	sp_0443	0	7	33	6	59	5	178	2	23	0	0	20	76	15	10	5	19	8	26	20	21	Bacteria; Firmicutes; Clostridia; Clostridiales; Lachnospiraceae
658370	sp_0215	218	11	115	115	168	74	146	202	229	93	26	138	151	52	38	31	0	6	41	5	61	Bacteria; Firmicutes; Clostridia; Clostridiales; Lachnospiraceae
659831	sp_0800	5	0	0	24	2	0	0	2	0	0	0	4	0	5	5	0	0	4	2	2	2	Bacteria; Firmicutes; Clostridia; Clostridiales
660214	sp_1623	0	0	0	0	0	0	0	0	2	0	0	0	0	0	0	0	0	0	0	0	0	Bacteria; Firmicutes; Clostridia; Clostridiales
661055	sp_0103	8	0	3	0	0	34	0	6	11	14	24	15	0	8	83	293	542	2966	542	172	0	Bacteria; Firmicutes; Clostridia; Clostridiales
681370	sp_0235	9	0	8	0	0	12	0	2	30	21	52	21	89	0	217	0	11	15	11	900	536	Bacteria; Actinobacteria; Actinobacteria; Bifidobacteriales; Bifidobacteriaceae; Bifidobacterium; pseudolongum
683621	sp_1242	0	0	0	0	0	0	0	0	0	0	0	0	0	0	0	2	5	0	0	0	0	Bacteria; Firmicutes; Clostridia; Clostridiales; Clostridiaceae
688923	sp_0744	0	0	0	0	0	0	0	0	0	0	0	17	28	2	2	11	16	9	10	11	12	Bacteria; Firmicutes; Clostridia; Clostridiales; Ruminococcaceae
694337	sp_0506	26	14	22	6	6	17	6	11	8	20	13	22	31	5	16	13	19	18	25	65	27	Bacteria; Firmicutes; Clostridia; Clostridiales; Ruminococcaceae
695909	sp_1439	0	0	0	0	0	0	0	0	0	0	3	0	0	0	0	0	0	0	0	0	0	Bacteria; Firmicutes; Clostridia; Clostridiales; Clostridiaceae
697874	sp_0467	11	8	3	46	29	4	0	20	0	2	12	4	0	12	25	0	0	30	66	11	12	Bacteria; Firmicutes; Clostridia; Clostridiales
701221	sp_0339	34	3	58	39	14	22	2	69	17	5	3	5	0	2	73	7	11	49	24	0	0	Bacteria; Firmicutes; Clostridia; Clostridiales; Lachnospiraceae; Roseburia
708680	sp_0025	137	5	3149	211	2346	2004	1400	1254	2270	1472	314	4334	5	12	375	27	46	252	367	271	858	Bacteria; Firmicutes; Clostridia; Clostridiales; Lachnospiraceae; Roseburia
712677	sp_0009	3285	3138	6274	493	142	4089	298	2234	1447	2925	2038	978	1998	1019	5366	891	1408	2388	362	2337	2389	Bacteria; Firmicutes; Clostridia; Clostridiales; Clostridiaceae; SMB53
720944	sp_1068	0	0	0	0	0	0	0	0	16	0	0	0	0	0	0	0	0	0	0	0	0	Bacteria; Firmicutes; Clostridia; Clostridiales; Ruminococcaceae; Oscillospira
727945	sp_0682	0	0	0	6	2	0	0	0	0	0	2	5	13	10	7	4	6	6	8	0	3	Bacteria; Firmicutes; Clostridia; Clostridiales; Eubacteriaceae; Anaerofustis
739826	sp_0683	4	2	8	8	0	5	5	3	13	0	7	10	21	0	3	33	37	0	2	4	5	Bacteria; Firmicutes; Clostridia; Clostridiales; Lachnospiraceae
741599	sp_0920	0	0	0	0	0	0	0	2	0	0	0	3	0	4	0	0	0	2	3	0	0	Bacteria; Firmicutes; Clostridia; Clostridiales; Ruminococcaceae
758482	sp_0830	0	0	0	5	0	0	5	6	7	0	0	17	4	3	0	0	5	0	0	0	0	Bacteria; Firmicutes; Clostridia; Clostridiales; Ruminococcaceae
759751	sp_0763	0	0	0	0	0	0	0	0	0	2	0	5	6	2	0	2	0	7	0	0	0	Bacteria; Firmicutes; Clostridia; Clostridiales; Lachnospiraceae
759816	sp_0805	0	0	4	0	0	0	10	3	4	0	4	4	3	0	0	2	0	0	0	0	0	Bacteria; Firmicutes; Clostridia; Clostridiales; Ruminococcaceae
766113	sp_0923	2	3	5	0	0	0	0	7	0	0	0	0	2	0	3	2	0	0	5	3	0	Bacteria; Firmicutes; Clostridia; Clostridiales; Ruminococcaceae
766768	sp_1005	0	0	0	0	0	0	0	0	6	0	4	3	0	2	4	0	0	0	0	0	0	Bacteria; Firmicutes; Bacilli; Lactobacillales; Enterococcaceae; Enterococcus
768553	sp_0727	0	0	0	16	0	0	2	0	3	0	0	14	0	10	16	12	8	0	14	4	0	Bacteria; Proteobacteria; Gammaproteobacteria; Enterobacteriales; Enterobacteriaceae; Proteus
769075	sp_0603	3	0	0	31	2	3	0	12	59	2	0	2	13	19	0	2	10	8	9	0	0	Bacteria; Firmicutes; Clostridia; Clostridiales
772384	sp_0812	0	0	4	0	0	0	15	2	0	0	4	7	11	4	0	2	15	0	0	0	0	Bacteria; Firmicutes; Clostridia; Clostridiales; Lachnospiraceae
772398	sp_1624	0	0	0	0	2	0	0	0	0	0	0	0	0	0	0	0	0	0	0	0	0	Bacteria; Firmicutes; Clostridia; Clostridiales; Lachnospiraceae
772972	sp_0673	0	0	0	0	0	0	0	0	0	0	0	0	71	66	12	0	0	2	0	0	0	Bacteria; Firmicutes; Clostridia; Clostridiales
780650	sp_0863	0	2	0	0	0	3	0	0	0	8	2	0	0	0	4	0	0	6	0	4	6	Bacteria; Firmicutes; Clostridia; Clostridiales; Clostridiaceae
784184	sp_1625	0	0	2	0	0	0	0	0	0	0	0	0	0	0	0	0	0	0	0	0	0	Bacteria; Firmicutes; Clostridia; Clostridiales; Ruminococcaceae
786449	sp_0859	3	0	0	0	3	25	0	7	0	0	0	0	0	0	0	0	0	0	0	0	0	Bacteria; Firmicutes; Clostridia; Clostridiales; Lachnospiraceae
791522	sp_0712	8	17	0	0	93	3	0	4	0	0	0	0	0	0	0	0	0	0	0	0	0	Bacteria; Firmicutes; Clostridia; Clostridiales; Lachnospiraceae
792399	sp_1185	0	0	0	0	0	0	0	2	0	0	5	0	0	0	0	0	0	0	0	0	0	Bacteria; Firmicutes; Clostridia; Clostridiales; Ruminococcaceae
795773	sp_0779	0	0	0	8	3	3	0	0	0	8	0	0	0	0	0	10	0	6	7	2	3	Bacteria; Firmicutes; Clostridia; Clostridiales
797021	sp_0258	0	0	0	0	2	2	0	4	0	0	0	887	36	151	7	38	19	52	172	0	62	Bacteria; Firmicutes; Clostridia; Clostridiales
797229	sp_0401	49	18	10	22	5	12	6	2	0	6	39	0	0	0	0	9	11	0	0	0	0	Bacteria; Proteobacteria; Gammaproteobacteria; Enterobacteriales; Enterobacteriaceae
799034	sp_0627	21	40	0	0	0	178	0	0	2	0	2	0	2	0	0	0	0	0	6	0	3	Bacteria; Firmicutes; Clostridia; Clostridiales
805672	sp_0554	0	0	4	0	18	18	31	4	18	12	0	0	11	0	0	21	22	0	13	0	77	Bacteria; Firmicutes; Clostridia; Clostridiales; Ruminococcaceae; Oscillospira
808414	sp_0839	0	0	5	2	0	0	33	0	7	0	10	0	0	0	0	0	3	0	0	0	0	Bacteria; Firmicutes; Clostridia; Clostridiales; Lachnospiraceae
825939	sp_0285	9	163	0	0	70	0	2	0	4	50	247	0	0	0	6	0	0	12	8	0	0	Bacteria; Firmicutes; Clostridia; Clostridiales
826302	sp_0460	16	0	17	17	38	66	4	38	28	30	44	7	4	42	42	3	7	23	23	11	18	Bacteria; Firmicutes; Clostridia; Clostridiales; Lachnospiraceae; Coprococcus
826624	sp_0168	68	33	8	44	59	63	6	129	13	21	11	70	19	123	60	53	18	20	26	20	5	Bacteria; Firmicutes; Clostridia; Clostridiales
827592	sp_1626	0	0	0	0	0	0	0	0	0	2	0	0	0	0	0	0	0	0	0	0	0	Bacteria; Firmicutes; Clostridia; Clostridiales; Ruminococcaceae; Ruminococcus
827689	sp_0422	25	16	43	39	9	48	3	34	32	69	16	163	0	70	9	0	0	64	7	4	13	Bacteria; Firmicutes; Clostridia; Clostridiales
827794	sp_1069	0	0	0	0	0	0	0	0	0	0	0	0	0	0	0	0	3	2	0	0	0	Bacteria; Firmicutes; Clostridia; Clostridiales; Ruminococcaceae
828333	sp_1328	0	0	0	0	0	0	0	0	0	0	0	0	0	2	0	0	0	0	0	0	0	Bacteria; Firmicutes; Clostridia; Clostridiales
828483	sp_1395	0	0	0	0	0	0	2	0	0	0	0	0	0	0	0	0	0	0	0	0	0	Bacteria; Firmicutes; Clostridia; Clostridiales; Clostridiaceae
830014	sp_0347	39	46	67	58	83	64	13	140	45	64	26	10	7	21	15	32	30	59	42	29	39	Bacteria; Firmicutes; Clostridia; Clostridiales
830080	sp_0396	7	4	18	6	30	16	56	82	100	24	5	0	0	0	17	12	55	47	17	7	0	Bacteria; Firmicutes; Erysipelotrichi; Erysipelotrichales; Erysipelotrichaceae
830189	sp_0414	14	11	12	14	7	0	6	5	0	7	8	4	3	0	7	10	0	0	7	5	8	Bacteria; Firmicutes; Clostridia; Clostridiales
831409	sp_0755	17	6	3	9	8	4	3	4	0	13	6	13	0	0	3	10	4	2	7	4	7	Bacteria; Firmicutes; Clostridia; Clostridiales
831641	sp_1285	0	0	0	0	0	0	0	0	0	0	0	0	0	0	0	0	0	4	0	0	0	Bacteria; Tenericutes; Mollicutes; RF39
833458	sp_0678	6	0	2	0	0	0	0	12	5	0	50	0	0	0	9	0	0	0	3	0	2	Bacteria; Firmicutes; Clostridia; Clostridiales
833816	sp_1396	0	0	0	0	0	0	0	0	0	0	0	0	0	0	0	0	0	2	2	0	0	Bacteria; Firmicutes; Clostridia; Clostridiales; Lachnospiraceae
835456	sp_0337	0	33	0	4	3	4	5	41	7	0	0	84	21	464	9	98	76	13	20	0	0	Bacteria; Firmicutes; Clostridia; Clostridiales
837396	sp_0968	0	0	6	0	0	0	0	0	0	0	4	0	4	0	0	0	0	2	0	0	0	Bacteria; Firmicutes; Clostridia; Clostridiales
839137	sp_0365	34	13	31	27	41	107	16	13	67	44	45	15	21	36	34	15	16	24	7	0	12	Bacteria; Firmicutes; Clostridia; Clostridiales; Lachnospiraceae
839412	sp_1329	0	0	0	0	0	0	0	0	3	0	0	0	0	0	0	0	0	0	0	0	0	Bacteria; Firmicutes; Clostridia; Clostridiales
839598	sp_0736	0	0	4	2	0	0	0	0	0	0	0	19	3	0	0	36	10	26	0	0	2	Bacteria; Firmicutes; Clostridia; Clostridiales
840291	sp_1057	0	0	0	0	0	5	2	2	0	0	2	0	0	0	0	0	0	0	0	2	0	Bacteria; Proteobacteria; Gammaproteobacteria; Pseudomonadales; Moraxellaceae; Acinetobacter
842596	sp_1330	0	0	0	0	0	0	0	0	0	0	0	0	0	2	0	0	0	0	0	0	0	Bacteria; Firmicutes; Clostridia; Clostridiales; Lachnospiraceae; Coprococcus
843459	sp_0386	4	5	2	0	0	6	0	0	4	17	8	32	49	28	135	4	3	14	3	12	9	Bacteria; Firmicutes; Clostridia; Clostridiales; Clostridiaceae
844006	sp_1286	0	0	3	0	0	0	0	0	3	0	0	0	0	0	0	0	0	0	0	0	0	Bacteria; Firmicutes; Clostridia; Clostridiales; Ruminococcaceae
844375	sp_1287	0	0	0	2	2	0	0	0	0	0	0	2	0	0	0	0	0	0	0	0	0	Bacteria; Bacteroidetes; Bacteroidia; Bacteroidales; Bacteroidaceae; Bacteroides
846464	sp_1331	0	0	5	0	0	0	0	0	0	0	0	0	0	0	0	0	0	0	0	0	0	Bacteria; Firmicutes; Clostridia; Clostridiales; Ruminococcaceae
848615	sp_1080	0	0	3	0	0	0	10	0	2	0	0	0	0	0	0	0	0	0	0	0	0	Bacteria; Firmicutes; Clostridia; Clostridiales
849147	sp_1112	0	0	3	0	0	0	0	0	0	0	0	0	0	0	0	0	0	0	0	2	0	Bacteria; Firmicutes; Clostridia; Clostridiales
860192	sp_1018	0	0	0	3	0	3	5	0	0	0	0	0	0	0	0	0	0	0	2	0	0	Bacteria; Firmicutes; Erysipelotrichi; Erysipelotrichales; Erysipelotrichaceae; Coprobacillus
863612	sp_1146	0	0	2	0	3	0	0	0	0	0	0	0	0	0	0	0	0	0	0	0	0	Bacteria; Firmicutes; Clostridia; Clostridiales
863682	sp_1243	0	0	0	0	0	0	0	0	0	0	0	0	0	0	0	0	0	2	0	0	0	Bacteria; Firmicutes; Clostridia; Clostridiales
870421	sp_0374	37	32	29	46	14	11	9	64	10	43	53	0	0	2	0	21	28	31	39	17	43	Bacteria; Firmicutes; Clostridia; Clostridiales; Ruminococcaceae
875709	sp_0679	7	0	4	13	0	61	0	20	34	33	13	10	8	2	0	0	6	0	0	0	0	Bacteria; Firmicutes; Clostridia; Clostridiales; Lachnospiraceae
887025	sp_0157	0	0	55	147	31	0	225	453	61	25	0	579	182	121	3	97	178	0	0	0	0	Bacteria; Firmicutes; Clostridia; Clostridiales; Ruminococcaceae
921020	sp_1441	0	0	0	0	0	0	0	0	0	0	0	0	0	0	0	0	3	0	0	0	0	Bacteria; Tenericutes; Mollicutes; RF39
953855	sp_1113	0	0	0	0	0	0	2	0	0	0	0	2	0	0	0	0	2	0	0	0	0	Bacteria; Bacteroidetes; Bacteroidia; Bacteroidales; Bacteroidaceae; Bacteroides
968675	sp_1397	0	0	0	0	0	0	0	0	0	0	0	0	0	0	0	0	0	2	0	0	0	Bacteria; Proteobacteria; Gammaproteobacteria; Pasteurellales; Pasteurellaceae; Haemophilus; parainfluenzae
976470	sp_0647	13	13	31	0	13	14	0	6	38	21	14	5	11	7	0	4	2	3	7	2	2	Bacteria; Firmicutes; Clostridia; Clostridiales
985239	sp_1288	0	0	0	0	0	0	0	0	0	0	0	0	0	0	0	2	2	0	0	0	0	Bacteria; Firmicutes; Clostridia; Clostridiales; Lachnospiraceae
988932	sp_0167	41	179	113	17	165	0	45	3	31	25	27	58	275	0	132	34	70	23	4	17	35	Bacteria; Firmicutes; Clostridia; Clostridiales
1010876	sp_0948	0	0	0	0	0	0	0	0	0	0	4	0	0	0	0	0	0	0	4	6	5	Bacteria; Firmicutes; Clostridia; Clostridiales; Ruminococcaceae; Oscillospira
1029949	sp_1332	0	0	0	0	0	0	0	0	0	0	0	0	0	0	0	5	0	0	0	0	0	Bacteria; Firmicutes; Clostridia; Clostridiales; Lachnospiraceae; Lachnospira
1068836	sp_0620	21	21	20	22	0	10	9	33	0	0	10	6	7	0	7	20	6	0	0	4	0	Bacteria; Firmicutes; Clostridia; Clostridiales; Ruminococcaceae; Ruminococcus
1076316	sp_0770	0	0	0	0	0	0	0	0	2	0	0	0	0	0	3	6	13	3	8	75	3	Bacteria; Firmicutes; Bacilli; Bacillales; Staphylococcaceae; Staphylococcus; aureus
1076587	sp_0739	0	0	4	8	5	2	0	6	3	6	7	5	15	2	2	5	0	6	3	0	0	Bacteria; Firmicutes; Clostridia; Clostridiales; Lachnospiraceae; Dorea
1076818	sp_1147	0	0	2	0	0	0	0	0	0	2	0	0	0	0	0	3	4	0	0	0	0	Bacteria; Firmicutes; Clostridia; Clostridiales; Lachnospiraceae
1082539	sp_0551	3	12	3	4	11	0	24	13	43	4	10	23	47	42	7	7	4	8	25	6	11	Bacteria; Firmicutes; Bacilli; Lactobacillales; Streptococcaceae; Streptococcus
1094991	sp_0494	20	17	12	10	4	13	21	16	15	15	8	18	17	16	18	6	9	22	40	6	17	Bacteria; Firmicutes; Clostridia; Clostridiales; Ruminococcaceae
1104908	sp_1058	0	0	2	2	0	0	0	2	0	0	0	0	0	0	0	0	0	0	0	0	0	Bacteria; Firmicutes; Clostridia; Clostridiales; Ruminococcaceae
1105326	sp_0050	223	180	1112	446	829	608	213	198	1503	923	47	351	369	172	10	441	282	11	410	63	468	Bacteria; Firmicutes; Clostridia; Clostridiales
1105328	sp_0194	67	112	74	57	70	48	8	26	121	181	130	55	223	93	27	75	46	56	73	36	123	Bacteria; Firmicutes; Clostridia; Clostridiales; Lachnospiraceae; Coprococcus
1105343	sp_0245	51	26	27	94	14	41	26	51	73	63	106	115	107	53	43	27	6	123	12	15	37	Bacteria; Firmicutes; Clostridia; Clostridiales; Clostridiaceae; Clostridium
1105552	sp_0270	0	0	21	33	25	30	0	0	12	26	58	22	73	109	363	20	86	91	54	169	48	Bacteria; Firmicutes; Clostridia; Clostridiales; Lachnospiraceae; Dorea
1105687	sp_0217	31	52	34	38	66	40	88	90	56	55	21	72	80	53	25	77	86	55	131	35	68	Bacteria; Firmicutes; Clostridia; Clostridiales; Ruminococcaceae; Oscillospira
1106006	sp_0002	5789	2435	3096	3561	4423	2685	1779	4972	4973	6408	1930	5729	4771	5113	2182	5927	2447	2887	5517	3255	2419	Bacteria; Firmicutes; Clostridia; Clostridiales; Ruminococcaceae; Ruminococcus
1106302	sp_0563	2	4	3	11	0	5	0	0	0	0	2	9	3	0	2	6	27	17	48	6	14	Bacteria; Firmicutes; Clostridia; Clostridiales
1106614	sp_1631	2	0	0	0	0	0	0	0	0	0	0	0	0	0	0	0	0	0	0	0	0	Bacteria; Firmicutes; Clostridia; Clostridiales
1106654	sp_0733	0	0	0	0	0	4	0	33	0	0	0	34	2	0	0	5	0	4	0	0	0	Bacteria; Tenericutes; Mollicutes; RF39
1106683	sp_0089	0	2	7	494	0	0	0	213	0	0	0	393	0	0	16	8	453	2963	1447	0	137	Bacteria; Firmicutes; Clostridia; Clostridiales
1106830	sp_0534	28	16	27	14	0	0	2	0	37	65	7	29	32	11	0	35	15	13	15	0	2	Bacteria; Firmicutes; Clostridia; Clostridiales; Lachnospiraceae; Coprococcus
1107027	sp_0005	5439	3400	5006	68	546	3625	230	215	735	4817	5243	6259	2152	7126	5231	317	103	668	716	928	1435	Bacteria; Firmicutes; Bacilli; Lactobacillales; Lactobacillaceae; Lactobacillus
1107057	sp_0129	375	16	5	0	4	5	2	5	197	423	180	316	39	291	236	96	24	58	248	37	305	Bacteria; Firmicutes; Clostridia; Clostridiales
1107461	sp_0035	0	0	1066	102	986	230	514	892	2907	1020	12	1318	721	3	0	827	52	17	15	81	422	Bacteria; Firmicutes; Clostridia; Clostridiales
1107586	sp_0198	179	221	90	97	60	46	21	80	74	175	69	73	159	40	40	86	38	45	83	27	39	Bacteria; Firmicutes; Clostridia; Clostridiales; Lachnospiraceae; Coprococcus
1107759	sp_0316	0	0	0	0	0	0	0	0	0	0	0	0	0	0	63	2	0	233	186	346	257	Bacteria; Firmicutes; Clostridia; Clostridiales
1107799	sp_0501	9	13	79	20	112	57	6	62	75	32	7	4	0	6	18	0	0	24	0	2	5	Bacteria; Firmicutes; Clostridia; Clostridiales
1108078	sp_0820	0	0	0	0	0	0	0	0	0	0	0	0	0	0	0	0	2	26	0	0	0	Bacteria; Firmicutes; Clostridia; Clostridiales
1108453	sp_0663	4	0	0	0	0	0	0	0	0	0	0	3	0	0	8	0	0	0	0	5	0	Bacteria; Firmicutes; Clostridia; Clostridiales
1108745	sp_1244	0	0	0	0	0	0	0	0	0	0	0	0	0	2	2	0	0	0	0	3	0	Bacteria; Firmicutes; Clostridia; Clostridiales; [Mogibacteriaceae]
1109539	sp_0287	9	2	9	25	7	4	3	18	0	2	53	71	108	431	45	31	59	63	63	2	12	Bacteria; Firmicutes; Clostridia; Clostridiales; Lachnospiraceae
1109559	sp_0638	31	5	41	6	6	8	0	0	9	23	10	0	3	4	5	3	0	0	8	15	6	Bacteria; Firmicutes; Clostridia; Clostridiales
1109662	sp_1289	0	0	0	0	0	0	0	0	0	2	0	0	0	0	2	0	2	0	0	0	0	Bacteria; Firmicutes; Clostridia; Clostridiales; [Mogibacteriaceae]
1109864	sp_0139	265	160	284	274	297	294	143	392	343	185	88	300	177	138	5	31	18	34	128	2	174	Bacteria; Firmicutes; Clostridia; Clostridiales
1110007	sp_0659	0	0	0	0	0	0	0	0	0	0	0	0	0	18	0	6	2	89	20	3	5	Bacteria; Firmicutes; Clostridia; Clostridiales
1110008	sp_0568	4	22	0	2	7	0	0	0	5	7	5	0	0	0	0	0	0	3	2	0	0	Bacteria; Firmicutes; Clostridia; Clostridiales; Ruminococcaceae
1110037	sp_1006	0	0	0	0	0	0	0	0	0	0	0	0	0	0	0	0	13	0	0	0	0	Bacteria; Firmicutes; Clostridia; Clostridiales; Ruminococcaceae
1110135	sp_0039	173	1222	52	31	476	742	36	29	35	25	18	773	416	36	84	82	503	501	327	273	95	Bacteria; Firmicutes; Clostridia; Clostridiales; Lachnospiraceae
1110191	sp_0052	252	180	155	224	296	91	117	225	109	337	56	81	21	184	112	1091	840	814	537	102	2224	Bacteria; Firmicutes; Clostridia; Clostridiales; Ruminococcaceae
1110312	sp_0041	103	137	112	84	118	107	167	261	120	89	231	392	879	447	159	1588	1302	299	754	217	348	Bacteria; Firmicutes; Clostridia; Clostridiales
1110378	sp_0022	1028	440	737	441	621	400	316	799	1140	1348	420	819	1157	813	452	2719	1039	1084	1038	434	818	Bacteria; Firmicutes; Clostridia; Clostridiales; Ruminococcaceae; Oscillospira
1110412	sp_0360	69	27	64	20	40	33	12	47	53	42	19	19	50	15	13	12	42	20	12	29	20	Bacteria; Firmicutes; Clostridia; Clostridiales; [Mogibacteriaceae]
1110988	sp_0137	0	0	0	0	0	0	0	0	0	0	0	0	56	312	531	219	609	634	1032	653	124	Bacteria; Firmicutes; Clostridia; Clostridiales; Ruminococcaceae; Ruminococcus; flavefaciens
1111142	sp_0545	11	7	18	11	14	14	3	19	21	30	20	16	0	0	4	0	0	155	7	11	0	Bacteria; Firmicutes; Clostridia; Clostridiales
1111191	sp_0224	83	63	170	34	99	56	46	87	196	141	33	16	98	135	75	117	99	79	77	26	30	Bacteria; Firmicutes; Clostridia; Clostridiales; Lachnospiraceae; [Ruminococcus]; gnavus
1111522	sp_0900	0	0	0	0	2	0	0	0	0	0	2	0	0	0	0	14	0	0	0	4	0	Bacteria; Tenericutes; Mollicutes; RF39
1111582	sp_0868	2	0	0	3	0	0	2	2	2	2	2	11	2	0	0	2	7	0	0	0	0	Bacteria; Firmicutes; Bacilli; Lactobacillales; Enterococcaceae
1111745	sp_0491	20	18	19	44	29	28	0	15	45	17	7	2	15	25	2	0	0	0	11	0	12	Bacteria; Firmicutes; Clostridia; Clostridiales; Lachnospiraceae
1111754	sp_1040	0	0	0	4	0	0	2	0	0	0	0	0	0	0	0	3	2	8	0	0	0	Bacteria; Firmicutes; Clostridia; Clostridiales
1111782	sp_0523	46	0	0	0	0	30	0	0	0	0	20	26	7	5	27	22	93	12	9	11	0	Bacteria; Firmicutes; Clostridia; Clostridiales; Ruminococcaceae
1112139	sp_0806	0	0	0	0	24	4	0	0	0	0	4	0	0	0	0	0	0	0	0	0	0	Bacteria; Firmicutes; Clostridia; Clostridiales
1112763	sp_0836	0	2	4	6	8	14	0	0	0	2	0	0	0	0	0	0	5	4	4	3	0	Bacteria; Firmicutes; Erysipelotrichi; Erysipelotrichales; Erysipelotrichaceae
1113282	sp_0358	7	74	8	17	9	22	4	42	11	6	10	239	69	34	5	54	59	65	67	15	14	Bacteria; Tenericutes; Mollicutes; RF39
1121753	sp_1633	0	0	0	0	0	0	0	0	0	0	0	0	0	0	2	0	0	0	0	0	0	Bacteria; Firmicutes; Clostridia; Clostridiales; Peptostreptococcaceae
1123492	sp_0860	0	0	15	0	0	0	44	0	0	0	0	0	0	0	0	0	0	0	0	0	0	Bacteria; Firmicutes; Clostridia; Clostridiales; Ruminococcaceae
1136443	sp_0115	241	172	45	169	325	300	28	18	196	86	33	235	44	52	56	204	105	310	129	37	44	Bacteria; Deferribacteres; Deferribacteres; Deferribacterales; Deferribacteraceae; Mucispirillum; schaedleri
1521602	sp_1634	0	0	0	0	0	0	0	0	0	2	0	0	0	0	0	0	0	0	0	0	0	Bacteria; Firmicutes; Clostridia; Clostridiales; Clostridiaceae
1522739	sp_1635	0	0	0	0	0	0	0	0	0	0	2	0	0	0	0	0	0	0	0	0	0	Bacteria; Firmicutes; Clostridia; Clostridiales; Clostridiaceae
1566189	sp_1245	0	0	0	0	0	2	0	0	0	0	0	0	0	0	0	0	0	0	3	0	2	Bacteria; Bacteroidetes; Bacteroidia; Bacteroidales; Bacteroidaceae; Bacteroides
1569569	sp_1636	0	0	0	0	0	0	0	0	0	0	0	0	0	0	0	0	0	0	2	0	0	Bacteria; Firmicutes; Clostridia; Clostridiales; Ruminococcaceae; Oscillospira
1602314	sp_1637	0	0	0	0	0	0	0	0	0	0	2	0	0	0	0	0	0	0	0	0	0	Bacteria; Firmicutes; Clostridia; Clostridiales
1646259	sp_1638	0	0	0	0	0	2	0	0	0	0	0	0	0	0	0	0	0	0	0	0	0	Bacteria; Proteobacteria; Alphaproteobacteria; Rickettsiales; mitochondria
1737536	sp_0158	137	178	56	106	40	57	147	140	52	21	22	253	144	146	45	244	78	92	124	31	79	Bacteria; Firmicutes; Clostridia; Clostridiales; Ruminococcaceae; Oscillospira
1740498	sp_0752	0	10	0	5	0	4	12	3	0	2	6	7	6	4	0	2	6	2	8	3	8	Bacteria; Bacteroidetes; Bacteroidia; Bacteroidales; Bacteroidaceae; Bacteroides
1763286	sp_1041	0	0	0	0	0	2	0	0	0	0	2	0	0	0	0	0	0	0	0	4	0	Bacteria; Firmicutes; Clostridia; Clostridiales; Clostridiaceae
1776714	sp_0616	11	15	22	2	5	7	9	13	95	32	25	0	2	3	0	0	0	0	0	0	0	Bacteria; Firmicutes; Clostridia; Clostridiales; Lachnospiraceae
1838560	sp_1290	0	0	0	0	0	0	0	0	0	0	0	0	0	0	0	0	0	2	0	2	0	Bacteria; Firmicutes; Clostridia; Clostridiales; Clostridiaceae
1844553	sp_0665	10	8	14	5	12	5	4	8	8	21	4	7	13	4	4	13	9	9	6	2	5	Bacteria; Firmicutes; Clostridia; Clostridiales; Ruminococcaceae; Oscillospira
1906635	sp_1186	0	0	0	0	0	0	0	0	0	0	0	3	0	0	0	0	0	0	0	0	2	Bacteria; Bacteroidetes; Bacteroidia; Bacteroidales; Bacteroidaceae; Bacteroides
1944498	sp_1640	0	0	0	0	0	0	0	0	0	0	0	0	0	2	0	0	0	0	0	0	0	Bacteria; Bacteroidetes; Bacteroidia; Bacteroidales; Bacteroidaceae; Bacteroides
1959881	sp_1398	0	0	0	0	0	0	0	0	0	0	0	0	0	0	0	0	0	2	0	0	0	Bacteria; Firmicutes; Clostridia; Clostridiales; Clostridiaceae
2051184	sp_1333	0	0	2	0	0	0	0	0	0	0	0	0	0	0	0	0	0	3	0	0	0	Bacteria; Firmicutes; Clostridia; Clostridiales; Clostridiaceae
2051608	sp_1443	0	0	0	0	0	0	0	0	3	0	0	0	0	0	0	0	0	0	0	0	0	Bacteria; Firmicutes; Clostridia; Clostridiales; Lachnospiraceae
2093795	sp_1246	0	0	0	0	0	0	0	0	0	0	0	0	0	0	2	0	0	0	0	0	3	Bacteria; Firmicutes; Clostridia; Clostridiales; Clostridiaceae
2110060	sp_1399	0	0	0	0	0	0	0	0	0	0	0	0	0	2	0	0	0	2	0	0	0	Bacteria; Bacteroidetes; Bacteroidia; Bacteroidales; Bacteroidaceae; Bacteroides
2120775	sp_1291	0	0	0	0	0	0	0	0	0	6	0	0	0	0	0	0	0	0	0	0	0	Bacteria; Firmicutes; Clostridia; Clostridiales
2157225	sp_1247	0	0	0	0	0	0	0	0	0	2	0	0	0	0	0	0	0	2	0	0	0	Bacteria; Firmicutes; Clostridia; Clostridiales; Clostridiaceae
2216519	sp_1081	0	0	0	0	0	0	0	0	5	0	0	0	4	0	0	4	0	0	0	0	0	Bacteria; Firmicutes; Clostridia; Clostridiales
2223970	sp_0864	4	0	2	0	0	0	19	0	0	0	0	0	3	0	0	2	0	0	6	4	0	Bacteria; Bacteroidetes; Bacteroidia; Bacteroidales; Bacteroidaceae; Bacteroides
2256425	sp_0939	0	0	6	0	0	0	0	0	0	0	0	0	0	0	4	0	2	0	2	7	2	Bacteria; Firmicutes; Clostridia; Clostridiales; Christensenellaceae
2272791	sp_1248	0	0	0	0	0	0	0	0	0	0	0	0	0	0	0	0	0	2	2	0	0	Bacteria; Firmicutes; Clostridia; Clostridiales; Clostridiaceae
2286580	sp_0710	0	0	0	4	0	0	0	0	0	0	0	8	2	7	2	0	0	0	27	2	9	Bacteria; Tenericutes; Mollicutes; RF39
2315700	sp_0318	78	55	50	72	43	91	0	83	89	34	34	44	57	45	14	58	27	0	35	0	20	Bacteria; Firmicutes; Clostridia; Clostridiales; Ruminococcaceae; Ruminococcus
2496531	sp_1249	0	0	0	0	0	0	0	0	0	0	0	0	0	0	0	0	0	0	0	0	3	Bacteria; Firmicutes; Clostridia; Clostridiales; Clostridiaceae
2548203	sp_1641	0	0	0	0	0	0	0	0	0	0	0	0	0	0	0	0	2	0	0	0	0	Bacteria; Firmicutes; Clostridia; Clostridiales
2645488	sp_0538	0	0	0	6	0	0	0	96	0	0	0	95	43	0	0	0	0	56	0	0	6	Bacteria; Firmicutes; Erysipelotrichi; Erysipelotrichales; Erysipelotrichaceae
2656868	sp_0813	2	3	0	13	3	0	2	0	5	2	3	0	0	2	2	2	4	3	5	6	3	Bacteria; Bacteroidetes; Bacteroidia; Bacteroidales; Bacteroidaceae; Bacteroides
2808641	sp_0584	16	5	0	0	114	0	0	20	0	0	56	0	0	0	0	0	0	0	39	0	4	Bacteria; Firmicutes; Clostridia; Clostridiales; Lachnospiraceae
2851803	sp_1334	0	0	0	0	0	0	0	0	0	0	0	0	0	0	2	3	0	0	0	0	0	Bacteria; Bacteroidetes; Bacteroidia; Bacteroidales; Bacteroidaceae; Bacteroides
2859978	sp_0776	2	4	0	7	4	0	7	3	4	3	2	5	3	6	7	8	3	0	3	2	7	Bacteria; Bacteroidetes; Bacteroidia; Bacteroidales; Bacteroidaceae; Bacteroides
2874602	sp_0780	2	5	5	7	3	3	5	5	3	5	5	5	0	6	2	6	4	4	0	3	2	Bacteria; Bacteroidetes; Bacteroidia; Bacteroidales; Bacteroidaceae; Bacteroides
2901240	sp_0120	496	325	34	233	241	118	2	67	12	51	34	35	22	67	170	16	42	132	139	6	100	Bacteria; Firmicutes; Clostridia; Clostridiales
2942332	sp_1149	0	0	2	0	0	0	0	0	0	0	3	0	0	0	3	0	0	0	0	0	0	Bacteria; Firmicutes; Clostridia; Clostridiales; Peptostreptococcaceae
2949920	sp_1150	0	0	0	0	0	0	0	0	0	0	0	0	0	0	2	0	0	2	0	2	0	Bacteria; Firmicutes; Clostridia; Clostridiales; Clostridiaceae
2979308	sp_0954	0	0	0	0	2	3	0	3	0	0	0	0	2	0	5	0	3	0	0	2	0	Bacteria; Firmicutes; Clostridia; Clostridiales; Ruminococcaceae; Ruminococcus
3016478	sp_1059	0	0	3	2	0	0	0	2	0	0	0	0	0	0	0	0	0	0	0	0	0	Bacteria; Firmicutes; Clostridia; Clostridiales; Ruminococcaceae; Ruminococcus
3029968	sp_0505	0	0	0	0	0	0	0	0	0	0	0	0	0	0	409	2	0	0	0	0	0	Bacteria; Firmicutes; Clostridia; Clostridiales; Lachnospiraceae
3176547	sp_0988	0	0	0	0	3	5	0	0	0	0	0	0	0	0	0	0	3	5	8	0	0	Bacteria; Firmicutes; Clostridia; Clostridiales
3256931	sp_0576	12	17	9	7	17	12	18	10	6	4	15	17	6	13	16	19	11	11	16	13	17	Bacteria; Bacteroidetes; Bacteroidia; Bacteroidales; Bacteroidaceae; Bacteroides
3304796	sp_1642	0	0	0	0	0	0	0	0	0	0	0	2	0	0	0	0	0	0	0	0	0	Bacteria; Firmicutes; Clostridia; Clostridiales; Lachnospiraceae; Roseburia
3358082	sp_1335	0	0	0	0	0	0	0	0	0	2	0	0	0	0	0	0	0	0	0	0	3	Bacteria; Firmicutes; Clostridia; Clostridiales; Clostridiaceae
3377773	sp_0797	0	0	8	4	2	0	5	5	9	4	0	2	5	3	12	2	11	12	0	0	4	Bacteria; Firmicutes; Erysipelotrichi; Erysipelotrichales; Erysipelotrichaceae
3412718	sp_1151	0	0	0	0	0	0	0	0	0	0	0	0	0	0	0	0	0	0	0	0	2	Bacteria; Firmicutes; Clostridia; Clostridiales; Ruminococcaceae
3426658	sp_0630	6	15	2	7	9	7	21	10	6	3	14	11	10	11	5	13	15	4	8	16	4	Bacteria; Bacteroidetes; Bacteroidia; Bacteroidales; Bacteroidaceae; Bacteroides
3439403	sp_0912	0	0	2	0	2	2	7	4	2	3	0	5	0	0	0	0	0	0	0	0	2	Bacteria; Bacteroidetes; Bacteroidia; Bacteroidales; Bacteroidaceae; Bacteroides
3443256	sp_0940	3	0	0	3	0	0	5	0	0	0	3	3	0	0	0	4	0	0	3	0	0	Bacteria; Bacteroidetes; Bacteroidia; Bacteroidales; Bacteroidaceae; Bacteroides
3486634	sp_1070	0	0	0	2	0	2	4	0	0	0	0	0	0	2	0	0	0	2	0	0	0	Bacteria; Bacteroidetes; Bacteroidia; Bacteroidales; Bacteroidaceae; Bacteroides; uniformis
3563235	sp_0646	4	16	3	9	9	12	18	9	9	2	9	5	5	7	4	11	5	5	15	13	3	Bacteria; Bacteroidetes; Bacteroidia; Bacteroidales; Bacteroidaceae; Bacteroides
3584772	sp_1082	0	0	0	0	0	0	0	0	0	0	0	0	0	0	0	0	5	3	2	0	0	Bacteria; Tenericutes; Mollicutes; RF39
3734841	sp_1019	0	0	0	0	0	3	0	0	0	2	0	0	0	0	6	0	0	2	0	3	0	Bacteria; Firmicutes; Clostridia; Clostridiales; Clostridiaceae
3750380	sp_1643	0	0	0	0	0	0	0	0	0	0	0	0	0	2	0	0	0	0	0	0	0	Bacteria; Firmicutes; Clostridia; Clostridiales
3785400	sp_1292	0	0	0	0	0	0	0	0	0	0	0	0	0	0	0	0	0	0	0	0	2	Bacteria; Bacteroidetes; Bacteroidia; Bacteroidales; Bacteroidaceae; Bacteroides
3867172	sp_1644	2	0	0	0	0	0	0	0	0	0	0	0	0	0	0	0	0	0	0	0	0	Bacteria; Proteobacteria; Gammaproteobacteria; Enterobacteriales; Enterobacteriaceae
3887769	sp_0792	0	2	3	2	10	3	5	0	8	0	4	3	0	2	3	4	3	2	4	9	3	Bacteria; Bacteroidetes; Bacteroidia; Bacteroidales; Bacteroidaceae; Bacteroides
3940440	sp_1645	0	0	0	0	0	0	0	0	2	0	0	0	0	0	0	0	0	0	0	0	0	Bacteria; Bacteroidetes; Bacteroidia; Bacteroidales; Bacteroidaceae; Bacteroides
4008675	sp_1336	0	0	0	0	0	0	0	0	0	0	0	3	0	0	0	0	0	0	0	0	0	Bacteria; Bacteroidetes; Bacteroidia; Bacteroidales; Bacteroidaceae; Bacteroides
4029632	sp_0989	2	5	0	2	2	0	3	0	0	0	0	4	0	0	0	2	0	0	2	0	0	Bacteria; Bacteroidetes; Bacteroidia; Bacteroidales; Bacteroidaceae; Bacteroides
4030375	sp_1337	0	2	0	0	0	0	0	0	0	0	0	0	0	0	0	3	0	0	0	0	0	Bacteria; Bacteroidetes; Bacteroidia; Bacteroidales; Bacteroidaceae; Bacteroides
4035247	sp_0059	47	201	95	132	256	258	724	321	112	96	112	359	183	116	400	263	526	461	294	396	314	Bacteria; Bacteroidetes; Bacteroidia; Bacteroidales; Bacteroidaceae; Bacteroides
4056429	sp_0391	0	0	0	0	17	3	10	7	0	0	0	9	8	0	14	28	123	111	62	7	11	Bacteria; Firmicutes; Clostridia; Clostridiales; Ruminococcaceae
4212012	sp_1204	0	0	0	0	0	0	4	0	2	0	0	0	0	2	0	0	0	0	0	0	0	Bacteria; Bacteroidetes; Bacteroidia; Bacteroidales; Bacteroidaceae; Bacteroides; uniformis
4267520	sp_1071	0	0	0	0	2	0	0	0	0	0	2	0	0	0	0	2	0	0	0	0	0	Bacteria; Firmicutes; Clostridia; Clostridiales; Ruminococcaceae
4289858	sp_0944	3	0	0	0	0	0	0	0	0	2	0	0	0	0	5	2	0	3	0	5	4	Bacteria; Firmicutes; Clostridia; Clostridiales; Clostridiaceae
4289859	sp_1028	2	0	7	0	0	0	0	0	0	0	0	0	2	0	3	0	0	2	0	0	0	Bacteria; Firmicutes; Clostridia; Clostridiales
4296216	sp_0010	259	261	1248	1034	856	1348	1087	1761	87	198	1559	2259	3116	375	2397	1601	3465	1153	4992	360	1195	Bacteria; Firmicutes; Clostridia; Clostridiales; Ruminococcaceae; Ruminococcus
4296778	sp_0969	0	0	3	4	0	2	0	0	0	0	2	0	0	0	0	0	6	0	0	0	0	Bacteria; Firmicutes; Clostridia; Clostridiales; Lachnospiraceae
4315958	sp_0882	3	0	2	5	0	2	2	4	8	0	0	0	0	0	0	0	3	0	0	0	0	Bacteria; Firmicutes; Bacilli; Lactobacillales; Streptococcaceae; Streptococcus
4319005	sp_0126	0	0	0	0	0	0	9	2456	0	0	0	0	0	0	0	0	0	0	0	0	0	Bacteria; Firmicutes; Clostridia; Clostridiales
4333943	sp_0078	9	33	27	325	181	72	85	61	30	10	64	1317	402	71	61	574	1002	423	29	58	47	Bacteria; Proteobacteria; Alphaproteobacteria; RF32
4336940	sp_1250	0	0	0	0	0	0	0	0	0	0	0	0	0	0	0	3	0	0	0	0	0	Bacteria; Firmicutes; Clostridia; Clostridiales
4341886	sp_1060	0	0	0	0	0	2	0	0	3	0	0	2	0	0	2	0	0	0	2	0	0	Bacteria; Firmicutes; Clostridia; Clostridiales; Ruminococcaceae
4343580	sp_0893	2	6	0	0	0	4	2	4	0	0	0	0	2	4	4	2	0	2	0	0	4	Bacteria; Bacteroidetes; Bacteroidia; Bacteroidales; Bacteroidaceae; Bacteroides
4344860	sp_1251	0	0	2	0	0	0	0	0	0	0	0	0	2	0	0	3	0	0	0	0	0	Bacteria; Firmicutes; Clostridia; Clostridiales; Lachnospiraceae; Roseburia
4354915	sp_1648	0	0	0	0	0	0	0	0	0	0	0	0	0	2	0	0	0	0	0	0	0	Bacteria; Bacteroidetes; Bacteroidia; Bacteroidales; Bacteroidaceae; Bacteroides
4355739	sp_0696	0	6	7	19	10	5	13	46	15	4	0	0	0	0	0	2	0	7	0	0	25	Bacteria; Firmicutes; Clostridia; Clostridiales
4355971	sp_1649	0	2	0	0	0	0	0	0	0	0	0	0	0	0	0	0	0	0	0	0	0	Bacteria; Firmicutes; Clostridia; Clostridiales; Clostridiaceae
4357712	sp_0747	2	6	0	4	6	5	5	2	5	2	3	5	3	7	2	8	10	2	12	3	7	Bacteria; Bacteroidetes; Bacteroidia; Bacteroidales; Bacteroidaceae; Bacteroides
4357811	sp_0619	5	8	4	5	15	8	17	10	5	6	7	15	11	12	13	10	9	10	19	12	10	Bacteria; Bacteroidetes; Bacteroidia; Bacteroidales; Bacteroidaceae; Bacteroides
4359832	sp_0441	15	21	9	12	22	41	18	73	64	23	0	0	0	0	0	18	13	80	8	10	16	Bacteria; Firmicutes; Clostridia; Clostridiales
4369131	sp_0972	0	2	3	0	0	0	0	0	0	2	0	2	0	3	0	0	0	0	6	2	2	Bacteria; Firmicutes; Clostridia; Clostridiales; Dehalobacteriaceae; Dehalobacterium
4369794	sp_1128	0	0	0	0	0	0	0	0	0	0	0	0	3	0	0	0	2	2	0	0	0	Bacteria; Firmicutes; Clostridia; Clostridiales; Lachnospiraceae
4370912	sp_0909	0	3	11	0	2	3	0	0	4	3	2	0	2	0	3	0	2	0	0	3	0	Bacteria; Firmicutes; Clostridia; Clostridiales; Clostridiaceae
4374663	sp_1293	0	2	0	0	0	0	0	0	0	0	0	0	0	0	0	0	0	2	0	0	0	Bacteria; Firmicutes; Bacilli; Lactobacillales; Lactobacillaceae; Lactobacillus; reuteri
4379449	sp_1170	0	0	4	0	0	0	0	0	4	0	2	0	0	0	0	0	0	0	0	0	0	Bacteria; Firmicutes; Erysipelotrichi; Erysipelotrichales; Erysipelotrichaceae
4380137	sp_1083	0	0	2	0	0	4	0	2	0	0	2	0	0	0	3	0	0	0	0	0	0	Bacteria; Firmicutes; Clostridia; Clostridiales; Peptostreptococcaceae
4380191	sp_1007	0	0	4	0	5	0	2	0	3	2	0	4	0	0	2	0	0	0	0	0	0	Bacteria; Firmicutes; Clostridia; Clostridiales; Lachnospiraceae; Roseburia
4383135	sp_1025	0	0	5	3	2	2	0	2	7	0	0	0	0	0	0	0	0	0	0	0	0	Bacteria; Firmicutes; Clostridia; Clostridiales
4389571	sp_1401	0	0	0	2	0	0	0	0	0	0	0	0	0	0	0	0	0	0	0	2	0	Bacteria; Bacteroidetes; Bacteroidia; Bacteroidales; Bacteroidaceae; Bacteroides
4390134	sp_1652	0	0	0	2	0	0	0	0	0	0	0	0	0	0	0	0	0	0	0	0	0	Bacteria; Bacteroidetes; Bacteroidia; Bacteroidales; Bacteroidaceae; Bacteroides
4390211	sp_0811	0	2	0	6	2	4	22	2	3	0	0	0	3	6	3	4	3	0	0	2	6	Bacteria; Bacteroidetes; Bacteroidia; Bacteroidales; Bacteroidaceae; Bacteroides; uniformis
4394350	sp_1653	2	0	0	0	0	0	0	0	0	0	0	0	0	0	0	0	0	0	0	0	0	Bacteria; Firmicutes; Clostridia; Clostridiales
4396250	sp_0878	0	0	0	0	0	4	0	0	0	0	0	0	0	4	13	0	2	0	0	7	15	Bacteria; Firmicutes; Clostridia; Clostridiales; Ruminococcaceae
4398588	sp_0903	2	0	0	0	0	2	0	0	0	0	0	0	2	0	6	0	3	2	4	3	0	Bacteria; Firmicutes; Clostridia; Clostridiales; Ruminococcaceae
4402042	sp_0176	280	24	47	92	0	0	0	0	0	110	81	142	0	115	87	2	0	2	172	0	182	Bacteria; Firmicutes; Clostridia; Clostridiales
4402077	sp_0166	83	287	17	18	0	0	2	699	131	2	5	153	2	0	657	245	0	305	0	0	0	Bacteria; Firmicutes; Clostridia; Clostridiales
4404461	sp_1402	0	0	0	0	0	0	0	0	0	0	0	0	0	0	0	0	0	0	2	0	0	Bacteria; Firmicutes; Clostridia; Clostridiales; Ruminococcaceae; Oscillospira
4407747	sp_1205	0	0	2	0	0	0	0	0	0	0	0	0	0	0	0	0	0	0	0	0	0	Bacteria; Firmicutes; Clostridia; Clostridiales; Ruminococcaceae
4412541	sp_1444	0	0	0	0	0	0	0	0	0	0	0	0	0	0	0	0	3	0	0	0	0	Bacteria; Firmicutes; Clostridia; Clostridiales; Ruminococcaceae
4414237	sp_1339	3	0	0	0	0	2	0	0	0	0	0	0	0	0	0	0	0	0	0	0	0	Bacteria; Firmicutes; Clostridia; Clostridiales; Ruminococcaceae; Ruminococcus
4416396	sp_0241	100	4	98	82	49	24	59	44	41	43	15	211	75	3	6	139	66	123	127	4	48	Bacteria; Firmicutes; Clostridia; Clostridiales
4417325	sp_1014	0	4	0	0	0	0	0	0	0	2	0	2	0	2	2	2	0	0	2	0	2	Bacteria; Bacteroidetes; Bacteroidia; Bacteroidales; Bacteroidaceae; Bacteroides
4428953	sp_1340	0	0	2	0	0	0	0	0	0	0	0	0	0	0	0	3	0	0	0	0	0	Bacteria; Firmicutes; Clostridia; Clostridiales; Lachnospiraceae; Roseburia
4430497	sp_0904	11	0	0	0	0	4	0	0	0	0	0	8	11	0	2	4	0	0	0	0	0	Bacteria; Firmicutes; Clostridia; Clostridiales; Lachnospiraceae
4430499	sp_0865	0	0	0	0	0	0	0	0	0	0	0	0	58	0	0	0	0	0	0	0	0	Bacteria; Firmicutes; Clostridia; Clostridiales; Ruminococcaceae
4430922	sp_1252	0	0	0	0	0	0	0	0	3	0	0	0	4	0	0	0	0	0	0	0	0	Bacteria; Tenericutes; Mollicutes; RF39
4432234	sp_0457	27	53	2	26	26	0	0	62	0	3	28	2	2	0	23	3	5	27	37	28	0	Bacteria; Firmicutes; Clostridia; Clostridiales; Ruminococcaceae
4440360	sp_0058	939	0	13	0	33	1075	13	0	14	17	0	2153	2192	0	503	1305	0	60	540	0	3	Bacteria; Firmicutes; Clostridia; Clostridiales; Lachnospiraceae
4445078	sp_1403	0	0	0	0	0	0	0	0	0	0	0	0	0	0	0	0	4	0	0	0	0	Bacteria; Firmicutes; Clostridia; Clostridiales
4446732	sp_0144	0	0	174	257	0	0	0	0	37	45	1461	194	221	0	9	0	0	0	0	0	0	Bacteria; Tenericutes; Mollicutes; RF39
4449236	sp_1341	0	0	0	0	0	0	0	0	0	0	0	0	0	0	0	0	0	0	0	3	2	Bacteria; Proteobacteria; Betaproteobacteria; Burkholderiales; Alcaligenaceae; Sutterella
4455677	sp_0092	153	230	76	487	95	787	81	81	125	228	187	67	287	128	22	93	240	159	674	0	13	Bacteria; Firmicutes; Clostridia; Clostridiales
4456605	sp_1404	0	0	0	0	0	0	0	0	0	2	0	0	2	0	0	0	0	0	0	0	0	Bacteria; Firmicutes; Clostridia; Clostridiales
4457438	sp_1405	0	0	2	0	0	0	0	0	0	0	0	2	0	0	0	0	0	0	0	0	0	Bacteria; Firmicutes; Clostridia; Clostridiales; Lachnospiraceae; Roseburia
4459940	sp_1445	0	3	0	0	0	0	0	0	0	0	0	0	0	0	0	0	0	0	0	0	0	Bacteria; Firmicutes; Clostridia; Clostridiales; Lachnospiraceae
4468234	sp_1171	0	0	0	0	0	0	0	0	0	0	0	4	0	2	0	0	0	0	0	0	0	Bacteria; Bacteroidetes; Bacteroidia; Bacteroidales; Bacteroidaceae; Bacteroides
4475642	sp_0879	0	5	0	0	0	0	8	2	0	0	0	3	2	3	0	0	0	2	2	7	7	Bacteria; Bacteroidetes; Bacteroidia; Bacteroidales; Bacteroidaceae; Bacteroides
4476780	sp_1406	0	0	0	0	0	0	0	0	0	0	0	0	0	0	0	0	2	0	0	0	0	Bacteria; Bacteroidetes; Bacteroidia; Bacteroidales; Rikenellaceae
4480176	sp_0380	11	21	7	7	54	77	35	12	7	0	14	17	155	18	2	18	58	9	17	0	25	Bacteria; Firmicutes; Clostridia; Clostridiales
New.CleanUp.ReferenceOTU0	sp_0264	13	2	2	3	56	15	4	6	2	0	0	0	2	0	0	455	37	33	167	0	3	Bacteria; Firmicutes; Clostridia; Clostridiales; Lachnospiraceae
New.CleanUp.ReferenceOTU1	sp_0431	3	367	0	13	0	12	8	115	0	0	3	0	27	3	0	22	9	97	21	16	3	Bacteria; Firmicutes; Clostridia; Clostridiales; Ruminococcaceae
New.CleanUp.ReferenceOTU10	sp_0173	0	4	1417	20	43	0	6	16	8	3	0	12	11	2	2	2	248	11	0	4	16	Bacteria; Firmicutes; Clostridia; Clostridiales; Ruminococcaceae; Oscillospira
New.CleanUp.ReferenceOTU100	sp_0095	0	6	26	3	0	2	2	51	0	31	0	2	4	10	10	0	3	1257	0	0	0	Unassigned
New.CleanUp.ReferenceOTU101	sp_0199	0	6	3	9	3	5	7	0	6	7	0	4	215	2	12	0	15	6	16	93	919	Bacteria; Firmicutes; Clostridia; Clostridiales
New.CleanUp.ReferenceOTU102	sp_0216	1531	8	0	113	4	7	0	9	0	0	0	0	0	11	3	0	2	280	0	0	0	Bacteria; Firmicutes; Clostridia; Clostridiales; Lachnospiraceae
New.CleanUp.ReferenceOTU103	sp_0500	2	49	3	0	3	7	0	39	3	0	0	66	0	0	76	0	0	8	2	16	0	Bacteria; Firmicutes; Clostridia; Clostridiales
New.CleanUp.ReferenceOTU104	sp_0408	4	0	51	5	0	15	5	2	0	0	19	6	0	38	0	2	52	103	0	59	13	Bacteria; Firmicutes; Clostridia; Clostridiales
New.CleanUp.ReferenceOTU105	sp_0519	51	0	0	0	10	0	5	2	0	13	4	3	0	112	5	0	6	3	18	8	14	Bacteria; Cyanobacteria; 4C0d-2; YS2
New.CleanUp.ReferenceOTU106	sp_0056	24	0	0	25	0	0	4	0	1825	9	0	2	7644	10	0	50	7	0	0	5	3	Unassigned
New.CleanUp.ReferenceOTU107	sp_0127	0	27	3	0	2	19	4	54	0	373	2	0	0	581	0	0	10	0	9	9	7	Unassigned
New.CleanUp.ReferenceOTU108	sp_0183	0	57	6	115	8	0	78	0	152	5	10	3	2131	14	2	0	33	0	15	0	7	Unassigned
New.CleanUp.ReferenceOTU109	sp_0336	483	0	2	0	115	0	113	0	0	2	5	0	0	7	0	0	15	52	6	2	0	Bacteria; Firmicutes; Clostridia; Clostridiales; Lachnospiraceae; Coprococcus
New.CleanUp.ReferenceOTU11	sp_0470	47	13	2	0	2	0	6	32	0	2	2	9	2	22	11	5	2	38	27	13	20	Bacteria; Firmicutes; Clostridia; Clostridiales; Ruminococcaceae
New.CleanUp.ReferenceOTU110	sp_0334	20	142	0	12	207	4	28	2	32	7	4	13	0	9	99	0	0	0	13	14	0	Bacteria; Firmicutes; Clostridia; Clostridiales; Ruminococcaceae
New.CleanUp.ReferenceOTU111	sp_0298	0	0	0	2	8	5	3	8	59	47	3	2	11	412	2	0	760	28	6	9	8	Bacteria; Firmicutes; Clostridia; Clostridiales; Ruminococcaceae
New.CleanUp.ReferenceOTU112	sp_0543	0	7	3	12	0	3	0	0	270	0	0	0	4	2	30	2	17	0	11	9	0	Bacteria; Verrucomicrobia; Verruco-5; WCHB1-41; RFP12
New.CleanUp.ReferenceOTU113	sp_0219	12	6	0	0	5	1011	8	9	20	6	721	0	2	6	0	107	2	12	0	2	2	Bacteria; Firmicutes; Clostridia; Clostridiales; Veillonellaceae; Anaerovibrio
New.CleanUp.ReferenceOTU114	sp_0071	7	0	0	6	4	3	4	18	20	0	7701	5	10	0	61	139	0	0	17	6	0	Bacteria; Firmicutes; Clostridia; Clostridiales; Ruminococcaceae
New.CleanUp.ReferenceOTU115	sp_0288	1049	21	17	0	30	0	23	0	4	0	29	3	5	3	10	0	0	308	7	2	0	Bacteria; Bacteroidetes; Bacteroidia; Bacteroidales
New.CleanUp.ReferenceOTU116	sp_0238	37	15	18	0	34	4	7	37	0	0	20	10	0	15	190	2	0	16	238	210	2	Bacteria; Firmicutes; Clostridia; Clostridiales; Ruminococcaceae
New.CleanUp.ReferenceOTU117	sp_0302	702	4	3	7	0	0	3	0	49	0	0	2	10	0	2	5	328	31	2	52	0	Bacteria; Tenericutes; Mollicutes; RF39
New.CleanUp.ReferenceOTU118	sp_0351	12	2	3	0	0	2	37	0	424	0	8	0	5	22	0	2	9	482	3	0	2	Bacteria; Firmicutes; Clostridia; Clostridiales; Veillonellaceae
New.CleanUp.ReferenceOTU119	sp_0477	2	43	7	0	0	170	3	3	3	165	9	2	23	8	32	0	52	4	2	18	0	Bacteria; Firmicutes; Erysipelotrichi; Erysipelotrichales; Erysipelotrichaceae; RFN20
New.CleanUp.ReferenceOTU12	sp_0308	87	43	22	2	0	18	4	0	42	0	0	17	0	14	5	0	3	16	0	3	0	Bacteria; Bacteroidetes; Bacteroidia; Bacteroidales; S24-7
New.CleanUp.ReferenceOTU120	sp_0244	0	0	38	3	2	0	4	14	0	0	54	2	4	3	0	1764	0	0	0	0	7	Bacteria; Firmicutes; Clostridia; Clostridiales; [Mogibacteriaceae]
New.CleanUp.ReferenceOTU121	sp_0439	110	25	0	15	0	0	2	154	5	0	53	3	30	0	0	0	21	52	2	4	0	Bacteria; Tenericutes; Mollicutes; RF39
New.CleanUp.ReferenceOTU122	sp_0320	0	0	2	3	34	127	21	45	11	0	2	6	41	0	3	27	5	3	2	0	0	Bacteria; Firmicutes; Clostridia; Clostridiales; Lachnospiraceae
New.CleanUp.ReferenceOTU123	sp_0327	74	4	570	0	3	36	0	4	3	11	2	2	7	0	3	11	0	199	14	5	4	Unassigned
New.CleanUp.ReferenceOTU124	sp_0073	3295	213	57	186	0	125	24	3	0	6	11	108	18	7	0	121	0	48	2	0	12	Unassigned
New.CleanUp.ReferenceOTU125	sp_0353	349	3	0	0	5	71	0	10	5	0	0	0	0	0	0	30	311	9	8	2	0	Bacteria; Bacteroidetes; Bacteroidia; Bacteroidales; Prevotellaceae; Prevotella; copri
New.CleanUp.ReferenceOTU126	sp_0087	6	4	3	182	7	0	2	0	0	427	3	3881	23	3	2	5	2	0	0	0	16	Bacteria; Firmicutes; Clostridia; Clostridiales; Lachnospiraceae
New.CleanUp.ReferenceOTU127	sp_0573	2	2	171	0	25	2	17	27	0	2	2	2	2	0	5	3	12	0	5	0	41	Bacteria; Firmicutes; Clostridia; Clostridiales; Lachnospiraceae; Coprococcus
New.CleanUp.ReferenceOTU128	sp_0028	0	0	0	10	2	23	5	9	7	14	3	0	38	1950	15395	18	7	208	0	3	4	Bacteria; Firmicutes; Clostridia; Clostridiales; Ruminococcaceae
New.CleanUp.ReferenceOTU129	sp_0206	9	2	10	16	2	0	0	3	0	23	2	0	224	3	0	316	0	3	30	2	19	Bacteria; Firmicutes; Clostridia; Clostridiales; Lachnospiraceae; Coprococcus
New.CleanUp.ReferenceOTU13	sp_0049	0	2	0	4	7	30	13	0	4	0	10272	0	3	14	10	98	23	0	0	14	4	Unassigned
New.CleanUp.ReferenceOTU130	sp_0541	0	0	5	31	26	11	6	0	0	22	2	14	54	2	22	158	7	0	4	0	0	Bacteria; Bacteroidetes; Bacteroidia; Bacteroidales; [Paraprevotellaceae]; [Prevotella]
New.CleanUp.ReferenceOTU131	sp_0349	0	5	4	0	191	73	2	36	272	8	0	0	0	2	2	3	0	11	91	5	68	Bacteria; Tenericutes; Mollicutes; RF39
New.CleanUp.ReferenceOTU132	sp_0399	6	2	0	0	0	73	2	0	21	0	17	5	9	7	5	0	0	9	0	3	2	Bacteria; Firmicutes; Clostridia; Clostridiales; Lachnospiraceae; Shuttleworthia
New.CleanUp.ReferenceOTU133	sp_0481	2	48	34	0	0	2	0	0	10	4	11	268	2	0	70	0	4	2	4	4	0	Unassigned
New.CleanUp.ReferenceOTU134	sp_0271	2	0	0	6	123	0	0	0	5	7	10	2	2	0	2	0	124	47	0	2	0	Unassigned
New.CleanUp.ReferenceOTU135	sp_0409	0	2	55	2	67	2	10	6	5	0	14	163	2	26	2	2	2	2	346	14	9	Bacteria; Tenericutes; Mollicutes; RF39
New.CleanUp.ReferenceOTU136	sp_0364	22	2	0	0	0	25	24	26	180	2	0	9	0	0	2	3	5	2	12	35	0	Bacteria; Bacteroidetes; Bacteroidia; Bacteroidales; Prevotellaceae; Prevotella; copri
New.CleanUp.ReferenceOTU137	sp_0272	2	3	2	0	7	3	0	736	9	0	0	0	0	74	4	6	2	487	14	0	2	Bacteria; Firmicutes; Clostridia; Clostridiales; Ruminococcaceae
New.CleanUp.ReferenceOTU138	sp_0105	50	3	30	0	14	30	0	0	0	2	0	8	3	4	4	3	2	4824	3	119	369	Bacteria; Firmicutes; Clostridia; Clostridiales; Ruminococcaceae; Oscillospira
New.CleanUp.ReferenceOTU139	sp_0150	2	0	0	3	166	2665	0	6	2	0	12	214	4	24	0	22	7	0	146	0	3	Bacteria; Firmicutes; Clostridia; Clostridiales; Ruminococcaceae
New.CleanUp.ReferenceOTU14	sp_0473	0	0	2	15	16	4	11	4	0	0	0	0	3	0	6	2	48	7	0	11	0	Bacteria; Bacteroidetes; Bacteroidia; Bacteroidales; Prevotellaceae; Prevotella; copri
New.CleanUp.ReferenceOTU140	sp_0143	2	9	2	2265	7	5	2	0	0	2	44	234	160	6	4	2	4	88	13	0	39	Bacteria; Bacteroidetes; Bacteroidia; Bacteroidales; Prevotellaceae; Prevotella
New.CleanUp.ReferenceOTU141	sp_0096	9	2	55	28	0	2	69	3798	0	6	0	4	0	8	0	0	4	0	0	2	0	Bacteria; Firmicutes; Clostridia; Clostridiales; Ruminococcaceae
New.CleanUp.ReferenceOTU142	sp_0412	15	19	0	20	44	0	0	0	0	0	494	3	5	0	3	0	7	5	2	13	7	Bacteria; Tenericutes; Mollicutes; RF39
New.CleanUp.ReferenceOTU143	sp_0251	208	22	0	0	4	107	0	4	28	0	2	0	0	5	0	83	4	2	5	2	62	Bacteria; Firmicutes; Clostridia; Clostridiales
New.CleanUp.ReferenceOTU144	sp_0067	0	5	2094	5905	10	0	52	4	0	8	0	0	0	3	0	0	25	4	6	13	0	Bacteria; Tenericutes; Mollicutes; RF39
New.CleanUp.ReferenceOTU145	sp_0718	2	0	0	18	0	9	5	4	2	0	4	2	0	0	8	2	2	0	6	0	3	Bacteria; Firmicutes; Clostridia; Clostridiales; Ruminococcaceae
New.CleanUp.ReferenceOTU146	sp_0642	2	55	2	0	12	0	0	0	0	73	0	0	0	0	4	4	7	0	0	0	0	Bacteria; Bacteroidetes; Bacteroidia; Bacteroidales; Prevotellaceae; Prevotella
New.CleanUp.ReferenceOTU147	sp_0181	2	15	0	0	3	2	422	2	11	0	0	3	17	4	0	9	8	0	10	3	0	Bacteria; Bacteroidetes; Bacteroidia; Bacteroidales; Prevotellaceae; Prevotella; copri
New.CleanUp.ReferenceOTU148	sp_0279	0	2	5	0	64	0	54	51	107	3	2	5	3	0	4	0	2	5	0	0	477	Unassigned
New.CleanUp.ReferenceOTU149	sp_0607	0	4	48	8	12	3	4	0	22	2	5	2	0	2	6	2	49	0	3	2	0	Bacteria; Firmicutes; Clostridia; Clostridiales; Veillonellaceae; Anaerovibrio
New.CleanUp.ReferenceOTU15	sp_0373	0	9	0	0	100	118	4	4	4	16	0	0	43	5	0	3	10	0	554	2	0	Bacteria; Firmicutes; Clostridia; Clostridiales
New.CleanUp.ReferenceOTU150	sp_0680	0	13	13	21	0	41	8	3	0	0	2	0	0	14	0	6	8	3	0	3	8	Bacteria; Firmicutes; Clostridia; Clostridiales; Lachnospiraceae
New.CleanUp.ReferenceOTU151	sp_0560	12	5	155	0	0	7	0	0	2	4	0	0	0	0	2	3	5	0	0	9	0	Bacteria; Firmicutes; Clostridia; Clostridiales; Ruminococcaceae
New.CleanUp.ReferenceOTU152	sp_0451	0	11	4	4	8	4	0	20	18	4	8	17	0	9	18	5	4	21	0	4	54	Bacteria; Bacteroidetes; Bacteroidia; Bacteroidales; [Paraprevotellaceae]; [Prevotella]
New.CleanUp.ReferenceOTU153	sp_0175	5	2	16	0	0	10	0	190	0	0	0	0	11	10	0	7	26	2190	0	119	0	Bacteria; Tenericutes; Mollicutes; RF39
New.CleanUp.ReferenceOTU154	sp_0292	0	12	3	36	53	58	0	11	0	27	0	0	2	2	2	0	6	0	0	0	4	Bacteria; Proteobacteria; Deltaproteobacteria; GMD14H09
New.CleanUp.ReferenceOTU155	sp_0086	0	1128	2	0	1774	89	0	220	30	151	0	38	2	0	24	3	14	0	15	16	2	Bacteria; Firmicutes; Clostridia; Clostridiales; Ruminococcaceae
New.CleanUp.ReferenceOTU156	sp_0521	0	2	9	3	0	9	0	0	9	2	11	7	0	0	4	10	146	0	6	6	3	Bacteria; Bacteroidetes; Bacteroidia; Bacteroidales; Prevotellaceae; Prevotella
New.CleanUp.ReferenceOTU157	sp_0420	0	19	7	0	5	3	0	15	0	0	86	0	0	38	18	0	0	0	0	0	3	Bacteria; Firmicutes; Clostridia; Clostridiales; Ruminococcaceae
New.CleanUp.ReferenceOTU158	sp_0226	2	7	4	20	0	3	0	0	4	0	2	3	3	20	40	17	5	0	0	8	47	Bacteria; Bacteroidetes; Bacteroidia; Bacteroidales; Prevotellaceae; Prevotella
New.CleanUp.ReferenceOTU159	sp_0329	3	3	0	6	6	6	0	0	0	23	7	4	0	3	0	2	3	0	0	2	0	Bacteria; Firmicutes; Clostridia; Clostridiales; Ruminococcaceae
New.CleanUp.ReferenceOTU16	sp_0311	2	0	712	0	0	0	108	0	13	0	2	3	17	3	0	253	0	8	5	152	0	Bacteria; Firmicutes; Clostridia; Clostridiales; Ruminococcaceae; Oscillospira
New.CleanUp.ReferenceOTU160	sp_0737	0	0	3	5	15	4	0	13	2	0	0	0	0	4	3	0	9	4	2	6	0	Bacteria; Firmicutes; Clostridia; Clostridiales; Lachnospiraceae
New.CleanUp.ReferenceOTU161	sp_0192	97	2	2	4	0	4	0	5	21	0	612	0	28	0	3	2	11	3	0	89	0	Unassigned
New.CleanUp.ReferenceOTU162	sp_0362	0	30	174	0	10	96	0	363	26	0	20	0	0	22	0	0	2	0	4	14	4	Bacteria; Firmicutes; Clostridia; Clostridiales; Ruminococcaceae
New.CleanUp.ReferenceOTU163	sp_0097	4	0	0	2	135	35	0	0	0	11	0	9	0	0	0	138	0	7	0	221	4740	Bacteria; Firmicutes; Clostridia; Clostridiales; Ruminococcaceae
New.CleanUp.ReferenceOTU164	sp_0227	66	325	19	0	0	0	0	10	50	874	213	2	5	0	6	0	2	0	0	0	15	Bacteria; Firmicutes; Clostridia; Clostridiales; Ruminococcaceae
New.CleanUp.ReferenceOTU165	sp_0171	95	12	7	0	3	0	0	0	31	6	5	2	3	2	7	2	2383	15	18	0	0	Bacteria; Firmicutes; Clostridia; Clostridiales; Ruminococcaceae
New.CleanUp.ReferenceOTU166	sp_0598	0	3	3	91	8	0	0	7	6	0	0	2	64	0	11	7	23	0	7	5	0	Bacteria; Bacteroidetes; Bacteroidia; Bacteroidales; S24-7
New.CleanUp.ReferenceOTU167	sp_0124	0	0	0	4	8	2	0	4	0	0	0	9	9	3	786	2	0	12	58	341	0	Bacteria; Bacteroidetes; Bacteroidia; Bacteroidales; S24-7
New.CleanUp.ReferenceOTU168	sp_0657	0	0	3	9	4	0	0	3	73	0	0	42	4	15	2	3	3	4	3	0	11	Bacteria; Firmicutes; Erysipelotrichi; Erysipelotrichales; Erysipelotrichaceae
New.CleanUp.ReferenceOTU169	sp_0290	0	0	0	0	262	2	0	0	0	1003	2	0	2	3	86	3	7	17	7	0	28	Bacteria; Firmicutes; Clostridia; Clostridiales; Lachnospiraceae
New.CleanUp.ReferenceOTU17	sp_0044	11248	0	2	11	64	7	5	0	5	0	27	7	0	36	3	0	0	216	33	3	0	Unassigned
New.CleanUp.ReferenceOTU170	sp_0587	8	80	0	16	0	3	0	7	2	0	0	0	6	6	0	0	4	20	0	0	28	Bacteria; Firmicutes; Clostridia; Clostridiales
New.CleanUp.ReferenceOTU171	sp_0142	0	69	2715	4	0	10	0	9	2	0	30	8	2	17	2	2	2	10	2	0	0	Bacteria; Firmicutes; Clostridia; Clostridiales; Lachnospiraceae
New.CleanUp.ReferenceOTU172	sp_0082	4	0	0	6	0	3	0	3	9	6	6	2	0	333	0	6	0	4	27	5	2	Bacteria; Bacteroidetes; Bacteroidia; Bacteroidales; S24-7
New.CleanUp.ReferenceOTU173	sp_0628	35	0	0	9	3	6	0	5	0	5	0	0	12	0	0	2	3	34	2	0	0	Bacteria; Firmicutes; Clostridia; Clostridiales; Ruminococcaceae
New.CleanUp.ReferenceOTU174	sp_0613	34	0	0	0	8	6	0	50	10	0	12	0	3	4	2	0	0	3	0	0	0	Unassigned
New.CleanUp.ReferenceOTU175	sp_0690	5	6	0	0	14	0	0	3	0	0	6	4	0	0	4	14	10	15	0	0	23	Bacteria; Firmicutes; Clostridia; Clostridiales; Ruminococcaceae; Ruminococcus
New.CleanUp.ReferenceOTU176	sp_0146	0	55	0	0	9	3	0	0	4	2	0	0	0	45	19	4	4	0	2	3396	10	Bacteria; Firmicutes; Clostridia; Clostridiales; Clostridiaceae
New.CleanUp.ReferenceOTU177	sp_0242	0	0	4	6	3	12	0	3	2	0	0	12	0	62	6	3	2	21	39	12	22	Bacteria; Bacteroidetes; Bacteroidia; Bacteroidales; [Paraprevotellaceae]; [Prevotella]
New.CleanUp.ReferenceOTU178	sp_0161	4	33	0	2676	3	75	0	4	0	0	45	0	3	56	0	0	95	11	4	0	209	Bacteria; Bacteroidetes; Bacteroidia; Bacteroidales; Prevotellaceae; Prevotella; copri
New.CleanUp.ReferenceOTU179	sp_0623	3	16	0	9	0	0	0	34	12	8	7	2	4	0	3	0	0	5	29	4	0	Bacteria; Firmicutes; Clostridia; Clostridiales; Ruminococcaceae
New.CleanUp.ReferenceOTU18	sp_0384	8	0	6	2	8	2	25	21	231	0	25	6	4	0	6	0	89	0	2	2	9	Bacteria; Tenericutes; Mollicutes; RF39
New.CleanUp.ReferenceOTU180	sp_0520	11	2	0	0	3	22	0	2	3	156	0	0	14	49	31	2	29	19	28	0	4	Bacteria; Firmicutes; Clostridia; Clostridiales
New.CleanUp.ReferenceOTU181	sp_0153	13	3	7	0	13	0	0	232	2	2	0	9	17	0	8	10	3	15	2	0	0	Bacteria; Firmicutes; Clostridia; Clostridiales
New.CleanUp.ReferenceOTU182	sp_0606	2	4	2	2	0	2	0	0	6	0	0	6	37	12	12	0	2	0	20	0	6	Bacteria; Tenericutes; Mollicutes; RF39
New.CleanUp.ReferenceOTU183	sp_0275	0	3	10	179	0	0	0	348	0	0	0	14	6	2	18	2	283	4	6	0	0	Bacteria; Firmicutes; Clostridia; Clostridiales; [Mogibacteriaceae]
New.CleanUp.ReferenceOTU184	sp_0070	13	3	4	0	2	11	0	2	16	7	6	15	0	8098	0	7	0	5	9	0	2	Unassigned
New.CleanUp.ReferenceOTU185	sp_0344	3	95	0	13	8	2	0	843	0	0	5	2	2	5	26	8	0	8	5	0	0	Bacteria; Firmicutes; Clostridia; Clostridiales; Veillonellaceae; Anaerovibrio
New.CleanUp.ReferenceOTU186	sp_0332	10	10	2	2	2	2	0	4	2	0	30	256	3	13	8	0	10	0	0	0	783	Bacteria; Firmicutes; Clostridia; Clostridiales; Ruminococcaceae
New.CleanUp.ReferenceOTU187	sp_0415	34	3	122	0	0	6	0	0	19	56	0	7	0	15	0	9	3	68	208	0	0	Bacteria; Firmicutes; Clostridia; Clostridiales; Ruminococcaceae
New.CleanUp.ReferenceOTU188	sp_0432	8	11	0	0	0	5	0	2	24	25	0	0	2	6	2	0	122	20	224	0	34	Bacteria; Firmicutes; Clostridia; Clostridiales
New.CleanUp.ReferenceOTU189	sp_0526	21	3	0	2	0	0	0	9	5	0	12	38	0	0	51	14	0	6	0	0	0	Bacteria; Firmicutes; Clostridia; Clostridiales
New.CleanUp.ReferenceOTU19	sp_0445	2	0	2	87	102	2	7	2	3	8	0	302	5	0	0	2	2	9	4	3	18	Bacteria; Tenericutes; Mollicutes; RF39
New.CleanUp.ReferenceOTU190	sp_0653	3	0	13	2	0	0	0	0	11	16	7	0	6	25	19	3	3	8	0	0	0	Unassigned
New.CleanUp.ReferenceOTU191	sp_0118	15	0	6	9	3	0	0	6	4331	2	5	99	0	2	24	8	5	3	0	0	0	Bacteria; Spirochaetes; Spirochaetes; Spirochaetales; Spirochaetaceae; Treponema
New.CleanUp.ReferenceOTU192	sp_0395	0	0	0	445	5	11	0	0	12	15	2	3	23	0	44	2	148	0	65	0	2	Bacteria; Bacteroidetes; Bacteroidia; Bacteroidales; Prevotellaceae; Prevotella
New.CleanUp.ReferenceOTU193	sp_0313	0	0	0	0	0	0	0	0	0	3	9	92	2	6	2	18	25	4	0	0	7	Bacteria; Firmicutes; Clostridia; Clostridiales; Lachnospiraceae; Blautia
New.CleanUp.ReferenceOTU194	sp_0456	2	0	505	0	0	6	0	0	2	2	7	0	0	0	2	0	0	8	0	0	7	Bacteria; Bacteroidetes; Bacteroidia; Bacteroidales; S24-7
New.CleanUp.ReferenceOTU195	sp_0425	58	7	3	0	3	4	0	188	0	0	0	2	3	11	44	8	0	47	0	0	0	Bacteria; Firmicutes; Clostridia; Clostridiales
New.CleanUp.ReferenceOTU196	sp_0508	3	0	0	77	88	2	0	0	11	2	8	3	0	2	0	12	3	0	2	0	2	Bacteria; Firmicutes; Clostridia; Clostridiales; Ruminococcaceae
New.CleanUp.ReferenceOTU197	sp_0323	23	20	4	0	4	2	0	0	0	60	2	3	3	5	4	364	0	0	0	0	4	Bacteria; Firmicutes; Clostridia; Clostridiales
New.CleanUp.ReferenceOTU198	sp_0402	8	7	114	3	0	4	0	2	0	0	243	2	0	2	2	11	0	2	0	0	0	Bacteria; Firmicutes; Clostridia; Clostridiales; Lachnospiraceae; Coprococcus
New.CleanUp.ReferenceOTU199	sp_0299	0	4	5	66	0	3	0	0	4	6	42	3	2	6	75	3	0	10	355	0	0	Bacteria; Proteobacteria; Betaproteobacteria; Burkholderiales; Alcaligenaceae; Sutterella
New.CleanUp.ReferenceOTU2	sp_0604	0	4	9	3	13	6	8	0	0	40	25	0	0	84	0	13	17	34	38	2	0	Bacteria; Firmicutes; Clostridia; Clostridiales; Ruminococcaceae
New.CleanUp.ReferenceOTU20	sp_0116	0	2	16	0	518	0	12	3	91	0	3	3289	69	855	32	2	2	2	6	107	6	Bacteria; Firmicutes; Clostridia; Clostridiales; Ruminococcaceae
New.CleanUp.ReferenceOTU200	sp_0660	0	0	17	17	111	2	0	4	0	4	0	0	0	0	14	2	13	10	2	0	13	Unassigned
New.CleanUp.ReferenceOTU201	sp_0666	0	0	0	80	2	2	0	10	10	5	2	2	0	0	7	6	18	10	5	0	7	Unassigned
New.CleanUp.ReferenceOTU202	sp_0252	1158	0	0	32	0	0	0	352	6	0	0	30	0	0	0	0	2	0	0	0	38	Bacteria; Firmicutes; Clostridia; Clostridiales; Clostridiaceae
New.CleanUp.ReferenceOTU203	sp_0450	15	0	8	4	4	43	0	0	0	0	0	0	292	0	153	4	0	0	0	0	35	Bacteria; Bacteroidetes; Bacteroidia; Bacteroidales; Prevotellaceae; Prevotella; copri
New.CleanUp.ReferenceOTU204	sp_0081	3	0	0	220	187	20	0	107	3572	0	0	16	0	0	0	0	0	2	2269	0	4	Bacteria; Firmicutes; Clostridia; Clostridiales; Ruminococcaceae
New.CleanUp.ReferenceOTU205	sp_0159	0	0	3	2943	10	37	0	0	0	17	3	4	3	0	0	0	2	2	0	0	8	Bacteria; Firmicutes; Clostridia; Clostridiales; Lachnospiraceae
New.CleanUp.ReferenceOTU206	sp_0394	139	0	2	2	2	218	0	3	2	69	15	2	3	0	0	0	7	18	26	0	0	Unassigned
New.CleanUp.ReferenceOTU207	sp_0611	0	0	0	6	9	0	0	0	8	4	76	0	9	0	6	0	0	0	3	0	0	Bacteria; Bacteroidetes; Bacteroidia; Bacteroidales; Prevotellaceae; Prevotella
New.CleanUp.ReferenceOTU208	sp_0529	0	0	6	0	3	0	0	3	13	2	8	4	2	0	0	0	141	0	2	0	0	Bacteria; Firmicutes; Clostridia; Clostridiales; Lachnospiraceae; Roseburia; faecis
New.CleanUp.ReferenceOTU209	sp_0186	2144	0	2	4	0	0	0	105	0	4	6	0	0	0	5	0	0	3	0	0	0	Bacteria; Firmicutes; Clostridia; Clostridiales; Ruminococcaceae
New.CleanUp.ReferenceOTU21	sp_0350	4	200	0	0	2	2	5	179	7	0	0	0	17	17	0	0	0	562	7	0	29	Bacteria; Tenericutes; Mollicutes; RF39
New.CleanUp.ReferenceOTU210	sp_0300	3	0	0	0	3	0	0	2	127	3	8	3	2	0	0	0	0	1097	130	0	0	Bacteria; Tenericutes; Mollicutes; RF39
New.CleanUp.ReferenceOTU211	sp_0488	12	0	0	13	0	0	0	6	0	0	10	0	51	0	24	0	0	35	192	0	0	Bacteria; Firmicutes; Clostridia; Clostridiales; Ruminococcaceae
New.CleanUp.ReferenceOTU212	sp_0324	0	0	2	0	16	0	0	53	0	2	0	2	3	0	352	0	0	7	0	0	0	Bacteria; Firmicutes; Clostridia; Clostridiales; Ruminococcaceae
New.CleanUp.ReferenceOTU213	sp_0586	14	0	11	20	8	0	0	0	0	2	24	4	0	0	3	0	27	7	95	0	9	Bacteria; Firmicutes; Clostridia; Clostridiales
New.CleanUp.ReferenceOTU214	sp_0392	4	0	17	19	2	0	0	3	3	5	6	0	2	0	0	0	3	8	62	0	0	Bacteria; Bacteroidetes; Bacteroidia; Bacteroidales; Prevotellaceae; Prevotella
New.CleanUp.ReferenceOTU215	sp_0211	2	0	4	0	14	0	0	8	0	2	2	2	30	0	12	0	2	0	0	0	3	Bacteria; Lentisphaerae; [Lentisphaeria]; Victivallales; Victivallaceae; Victivallis; vadensis
New.CleanUp.ReferenceOTU216	sp_0537	0	0	2	5	2	0	0	0	3	21	0	0	90	0	5	0	18	17	175	0	8	Bacteria; Firmicutes; Clostridia; Clostridiales; Lachnospiraceae
New.CleanUp.ReferenceOTU217	sp_0197	38	0	0	744	24	0	0	0	6	0	0	81	0	0	3	0	0	2	2	0	0	Bacteria; Bacteroidetes; Bacteroidia; Bacteroidales; RF16
New.CleanUp.ReferenceOTU218	sp_0557	3	0	16	23	0	0	0	9	10	2	67	5	0	0	2	0	9	3	0	0	2	Bacteria; Firmicutes; Clostridia; Clostridiales; Lachnospiraceae
New.CleanUp.ReferenceOTU219	sp_0493	0	0	0	0	2	0	0	0	14	2	3	2	12	0	5	0	7	67	72	0	0	Bacteria; Verrucomicrobia; Opitutae; HA64
New.CleanUp.ReferenceOTU22	sp_0121	0	9	5	0	2	19	4	143	0	3	7	0	3	0	6	8	3	0	455	4039	0	Bacteria; Proteobacteria; Deltaproteobacteria; GMD14H09
New.CleanUp.ReferenceOTU220	sp_0787	3	0	2	2	3	0	0	3	0	0	6	2	22	0	17	0	2	2	2	0	3	Bacteria; Tenericutes; Mollicutes; RF39
New.CleanUp.ReferenceOTU221	sp_0555	0	0	88	31	9	0	0	0	0	4	0	0	18	0	0	0	14	50	18	0	0	Bacteria; Firmicutes; Clostridia; Clostridiales; Clostridiaceae; Clostridium
New.CleanUp.ReferenceOTU222	sp_0185	17	0	0	362	0	0	0	0	6	0	0	4	35	0	152	0	0	0	526	0	29	Bacteria; Proteobacteria; Epsilonproteobacteria; Campylobacterales; Campylobacteraceae; Campylobacter
New.CleanUp.ReferenceOTU223	sp_0668	6	0	0	7	2	0	0	0	0	5	27	0	5	0	7	0	5	7	2	0	121	Bacteria; Firmicutes; Clostridia; Clostridiales; Ruminococcaceae
New.CleanUp.ReferenceOTU224	sp_0530	91	0	152	2	16	0	0	17	40	0	0	0	2	0	0	0	0	56	4	0	0	Bacteria; Tenericutes; Mollicutes; RF39
New.CleanUp.ReferenceOTU225	sp_0274	2	0	0	0	0	0	0	15	2	0	0	0	7	0	0	0	0	2	3	0	0	Bacteria; Firmicutes; Clostridia; Clostridiales
New.CleanUp.ReferenceOTU226	sp_0208	1635	0	3	9	68	0	0	16	6	6	0	0	0	0	0	0	0	2	7	0	0	Bacteria; Bacteroidetes; Bacteroidia; Bacteroidales
New.CleanUp.ReferenceOTU227	sp_0326	8	0	0	0	0	0	0	4	0	0	30	0	2	0	8	0	0	326	11	0	0	Unassigned
New.CleanUp.ReferenceOTU228	sp_0687	6	0	0	10	5	0	0	26	30	0	0	0	2	0	4	0	0	0	0	0	0	Bacteria; Firmicutes; Clostridia; Clostridiales; Ruminococcaceae
New.CleanUp.ReferenceOTU229	sp_0174	32	0	5	21	2	0	0	0	348	2452	5	0	0	0	11	0	0	0	0	0	0	Bacteria; Firmicutes; Clostridia; Clostridiales
New.CleanUp.ReferenceOTU23	sp_0459	4	3	6	52	4	98	0	12	83	4	0	0	0	0	15	3	0	306	3	0	2	Bacteria; Bacteroidetes; Bacteroidia; Bacteroidales; Prevotellaceae; Prevotella; copri
New.CleanUp.ReferenceOTU230	sp_0707	13	0	19	0	0	0	0	0	2	7	5	0	0	0	8	0	0	13	0	0	0	Bacteria; Firmicutes; Clostridia; Clostridiales; Ruminococcaceae
New.CleanUp.ReferenceOTU231	sp_0729	0	0	0	10	0	0	0	31	0	2	12	0	0	0	0	0	0	0	0	0	0	Bacteria; Firmicutes; Clostridia; Clostridiales; Ruminococcaceae; Ruminococcus
New.CleanUp.ReferenceOTU232	sp_0502	0	0	0	0	0	0	0	0	16	16	15	0	0	0	0	0	0	319	0	0	0	Bacteria; Firmicutes; Clostridia; Clostridiales; Lachnospiraceae; Roseburia
New.CleanUp.ReferenceOTU233	sp_0700	0	0	0	0	0	0	0	0	0	25	27	0	14	0	27	0	0	0	0	0	0	Bacteria; Proteobacteria; Gammaproteobacteria; Aeromonadales; Succinivibrionaceae
New.CleanUp.ReferenceOTU234	sp_0610	0	0	0	0	0	0	0	0	200	0	4	0	0	0	2	0	0	0	0	0	0	Bacteria; Tenericutes; Mollicutes; RF39
New.CleanUp.ReferenceOTU235	sp_0883	0	0	21	2	0	0	0	0	2	0	7	0	0	0	5	0	0	0	0	0	0	Bacteria; Bacteroidetes; Bacteroidia; Bacteroidales; Prevotellaceae; Prevotella; stercorea
New.CleanUp.ReferenceOTU236	sp_0495	0	0	175	0	0	0	0	0	10	260	13	0	0	0	14	0	0	0	0	0	0	Bacteria; Firmicutes; Clostridia; Clostridiales
New.CleanUp.ReferenceOTU237	sp_0738	0	0	68	7	0	0	0	0	14	0	17	0	0	0	0	0	0	0	0	0	0	Bacteria; Spirochaetes; Spirochaetes; Spirochaetales; Spirochaetaceae; Treponema
New.CleanUp.ReferenceOTU238	sp_0580	0	0	6	0	0	0	0	0	4	4	0	0	0	0	20	0	0	0	0	0	0	Bacteria; Firmicutes; Clostridia; Clostridiales; Clostridiaceae
New.CleanUp.ReferenceOTU239	sp_0552	0	0	0	0	0	0	0	0	0	4	57	0	0	0	10	0	0	0	0	0	0	Bacteria; Verrucomicrobia; Verruco-5; WCHB1-41; RFP12
New.CleanUp.ReferenceOTU24	sp_0536	0	0	17	0	0	6	18	2	14	0	0	8	189	10	7	27	0	3	0	0	0	Bacteria; Firmicutes; Clostridia; Clostridiales; Ruminococcaceae
New.CleanUp.ReferenceOTU240	sp_0677	0	0	0	0	0	0	0	0	0	0	165	0	0	0	0	0	0	0	0	0	0	Bacteria; Firmicutes; Clostridia; Clostridiales; Ruminococcaceae
New.CleanUp.ReferenceOTU241	sp_0585	0	0	3	0	0	0	0	0	287	5	0	0	0	0	5	0	0	0	0	0	0	Bacteria; Firmicutes; Clostridia; Clostridiales; Ruminococcaceae
New.CleanUp.ReferenceOTU242	sp_0728	0	0	0	0	0	0	0	0	18	17	0	0	0	0	8	0	0	0	0	0	0	Bacteria; Cyanobacteria; 4C0d-2; YS2
New.CleanUp.ReferenceOTU243	sp_0343	0	0	825	0	0	0	0	0	35	24	0	0	0	0	3	0	0	0	0	0	0	Bacteria; Verrucomicrobia; Opitutae; HA64
New.CleanUp.ReferenceOTU244	sp_0363	0	0	6	0	0	0	0	0	321	2	0	0	0	0	176	0	0	0	0	0	0	Bacteria; Tenericutes; RF3; ML615J-28
New.CleanUp.ReferenceOTU245	sp_0446	0	0	2	0	0	0	0	0	108	3	0	0	0	0	0	0	0	0	0	0	0	Unassigned
New.CleanUp.ReferenceOTU246	sp_0592	0	0	3	0	0	0	0	0	0	21	0	0	0	0	0	0	0	0	0	0	0	Unassigned
New.CleanUp.ReferenceOTU247	sp_0807	0	0	2	0	0	0	0	0	7	13	0	0	0	0	0	0	0	0	0	0	0	Bacteria; Firmicutes; Clostridia; Clostridiales; Clostridiaceae; Clostridium
New.CleanUp.ReferenceOTU248	sp_0465	0	0	2	0	0	0	0	0	0	0	0	0	0	0	0	0	0	0	0	0	0	Bacteria; Firmicutes; Clostridia; Clostridiales; Ruminococcaceae
New.CleanUp.ReferenceOTU249	sp_0069	0	0	8323	0	0	0	0	0	0	8	0	0	0	0	0	0	0	0	0	0	0	Bacteria; Firmicutes; Clostridia; Clostridiales
New.CleanUp.ReferenceOTU25	sp_0330	8	3	2	0	40	0	6	51	0	118	2	41	0	2	78	2	32	262	0	0	35	Bacteria; Spirochaetes; Spirochaetes; Spirochaetales; Spirochaetaceae; Treponema
New.CleanUp.ReferenceOTU250	sp_0701	0	0	0	0	0	0	0	0	4	3	0	0	0	0	0	0	0	0	0	0	0	Bacteria; Firmicutes; Clostridia; Clostridiales; [Mogibacteriaceae]
New.CleanUp.ReferenceOTU251	sp_0193	0	0	8	0	0	0	0	0	6	0	0	0	0	0	0	0	0	0	0	0	0	Bacteria; Bacteroidetes; Bacteroidia; Bacteroidales; Porphyromonadaceae; Parabacteroides
New.CleanUp.ReferenceOTU252	sp_0945	0	0	2	0	0	0	0	0	6	0	0	0	0	0	0	0	0	0	0	0	0	Bacteria; Bacteroidetes; Bacteroidia; Bacteroidales; [Odoribacteraceae]; Butyricimonas
New.CleanUp.ReferenceOTU253	sp_0497	0	0	6	0	0	0	0	0	0	2	0	0	0	0	0	0	0	0	0	0	0	Bacteria; Tenericutes; Mollicutes; RF39
New.CleanUp.ReferenceOTU254	sp_0207	0	0	174	0	0	0	0	0	0	0	0	0	0	0	0	0	0	0	0	0	0	Bacteria; Firmicutes; Clostridia; Clostridiales
New.CleanUp.ReferenceOTU255	sp_0669	0	0	13	0	0	0	0	0	5	0	0	0	0	0	0	0	0	0	0	0	0	Bacteria; Firmicutes; Clostridia; Clostridiales
New.CleanUp.ReferenceOTU256	sp_0894	0	0	5	0	0	0	0	0	2	10	0	0	0	0	0	0	0	0	0	0	0	Bacteria; Firmicutes; Clostridia; Clostridiales; Ruminococcaceae
New.CleanUp.ReferenceOTU257	sp_1042	0	0	0	0	0	0	0	0	8	0	0	0	0	0	0	0	0	0	0	0	0	Unassigned
New.CleanUp.ReferenceOTU258	sp_0093	0	0	21	0	0	0	0	0	5756	0	0	0	0	0	0	0	0	0	0	0	0	Bacteria; Bacteroidetes; Bacteroidia; Bacteroidales; [Paraprevotellaceae]; [Prevotella]
New.CleanUp.ReferenceOTU259	sp_0256	0	0	0	0	0	0	0	0	1834	0	0	0	0	0	0	0	0	0	0	0	0	Bacteria; Bacteroidetes; Bacteroidia; Bacteroidales; Prevotellaceae; Prevotella
New.CleanUp.ReferenceOTU26	sp_0400	2	6	0	0	0	131	2	0	0	0	0	0	29	0	43	68	38	0	5	2	30	Bacteria; Actinobacteria; Coriobacteriia; Coriobacteriales; Coriobacteriaceae
New.CleanUp.ReferenceOTU260	sp_0949	0	0	2	0	0	0	0	0	3	7	0	0	0	0	0	0	0	0	0	0	0	Bacteria; Bacteroidetes; Bacteroidia; Bacteroidales; Prevotellaceae; Prevotella
New.CleanUp.ReferenceOTU261	sp_0841	0	0	43	0	0	0	0	0	3	0	0	0	0	0	0	0	0	0	0	0	0	Bacteria; Bacteroidetes; Bacteroidia; Bacteroidales; Prevotellaceae; Prevotella; copri
New.CleanUp.ReferenceOTU262	sp_0720	0	0	9	0	0	0	0	0	88	0	0	0	0	0	0	0	0	0	0	0	0	Bacteria; Firmicutes; Clostridia; Clostridiales; Ruminococcaceae
New.CleanUp.ReferenceOTU263	sp_0777	0	0	0	0	0	0	0	0	0	67	0	0	0	0	0	0	0	0	0	0	0	Bacteria; Firmicutes; Clostridia; Clostridiales; Ruminococcaceae
New.CleanUp.ReferenceOTU264	sp_0869	0	0	2	0	0	0	0	0	0	6	0	0	0	0	0	0	0	0	0	0	0	Bacteria; Firmicutes; Clostridia; Clostridiales
New.CleanUp.ReferenceOTU265	sp_0654	0	0	180	0	0	0	0	0	3	3	0	0	0	0	0	0	0	0	0	0	0	Bacteria; Firmicutes; Clostridia; Clostridiales; Ruminococcaceae
New.CleanUp.ReferenceOTU266	sp_0884	0	0	0	0	0	0	0	0	0	5	0	0	0	0	0	0	0	0	0	0	0	Bacteria; Bacteroidetes; Bacteroidia; Bacteroidales; Prevotellaceae; Prevotella
New.CleanUp.ReferenceOTU267	sp_0697	0	0	10	0	0	0	0	0	35	125	0	0	0	0	0	0	0	0	0	0	0	Bacteria; Firmicutes; Clostridia; Clostridiales
New.CleanUp.ReferenceOTU268	sp_0724	0	0	16	0	0	0	0	0	37	4	0	0	0	0	0	0	0	0	0	0	0	Unassigned
New.CleanUp.ReferenceOTU269	sp_0889	0	0	3	0	0	0	0	0	0	0	0	0	0	0	0	0	0	0	0	0	0	Unassigned
New.CleanUp.ReferenceOTU27	sp_0261	13	2	0	0	2	534	0	24	20	19	11	19	4	12	575	2	48	0	86	0	0	Bacteria; Proteobacteria; Betaproteobacteria; Burkholderiales; Alcaligenaceae; Sutterella
New.CleanUp.ReferenceOTU270	sp_0625	0	0	151	0	0	0	0	0	0	32	0	0	0	0	0	0	0	0	0	0	0	Bacteria; Bacteroidetes; Bacteroidia; Bacteroidales; Prevotellaceae; Prevotella
New.CleanUp.ReferenceOTU271	sp_0961	0	0	4	0	0	0	0	0	0	0	0	0	0	0	0	0	0	0	0	0	0	Bacteria; Firmicutes; Clostridia; Clostridiales; Ruminococcaceae
New.CleanUp.ReferenceOTU272	sp_0648	0	0	16	0	0	0	0	0	0	2	0	0	0	0	0	0	0	0	0	0	0	Bacteria; Firmicutes; Clostridia; Clostridiales; Ruminococcaceae
New.CleanUp.ReferenceOTU274	sp_0910	0	0	5	0	0	0	0	0	0	5	0	0	0	0	0	0	0	0	0	0	0	Bacteria; Firmicutes; Clostridia; Clostridiales; Ruminococcaceae
New.CleanUp.ReferenceOTU275	sp_0693	0	0	7	0	0	0	0	0	0	136	0	0	0	0	0	0	0	0	0	0	0	Bacteria; Firmicutes; Clostridia; Clostridiales
New.CleanUp.ReferenceOTU276	sp_1114	0	0	8	0	0	0	0	0	0	5	0	0	0	0	0	0	0	0	0	0	0	Bacteria; Bacteroidetes; Bacteroidia; Bacteroidales; [Paraprevotellaceae]; [Prevotella]
New.CleanUp.ReferenceOTU277	sp_1029	0	0	18	0	0	0	0	0	0	2	0	0	0	0	0	0	0	0	0	0	0	Bacteria; Tenericutes; RF3; ML615J-28
New.CleanUp.ReferenceOTU279	sp_0823	0	0	3	0	0	0	0	0	0	4	0	0	0	0	0	0	0	0	0	0	0	Bacteria; Tenericutes; Mollicutes; RF39
New.CleanUp.ReferenceOTU28	sp_0593	6	6	0	2	3	9	0	0	5	4	0	0	8	136	0	2	3	0	59	0	0	Bacteria; Firmicutes; Clostridia; Clostridiales; Ruminococcaceae; Oscillospira
New.CleanUp.ReferenceOTU281	sp_0704	0	0	11	0	0	0	0	0	0	161	0	0	0	0	0	0	0	0	0	0	0	Bacteria; Cyanobacteria; 4C0d-2; YS2
New.CleanUp.ReferenceOTU282	sp_0861	0	0	5	0	0	0	0	0	0	54	0	0	0	0	0	0	0	0	0	0	0	Bacteria; Firmicutes; Clostridia; Clostridiales; Clostridiaceae
New.CleanUp.ReferenceOTU283	sp_1206	0	0	8	0	0	0	0	0	0	0	0	0	0	0	0	0	0	0	0	0	0	Bacteria; Tenericutes; Mollicutes; RF39
New.CleanUp.ReferenceOTU284	sp_0955	0	0	28	0	0	0	0	0	0	5	0	0	0	0	0	0	0	0	0	0	0	Bacteria; Tenericutes; Mollicutes; RF39
New.CleanUp.ReferenceOTU285	sp_1446	0	0	0	0	0	0	0	0	0	3	0	0	0	0	0	0	0	0	0	0	0	Bacteria; Firmicutes; Clostridia; Clostridiales; Ruminococcaceae
New.CleanUp.ReferenceOTU286	sp_1656	0	0	0	0	0	0	0	0	0	2	0	0	0	0	0	0	0	0	0	0	0	Bacteria; Tenericutes; Mollicutes; RF39
New.CleanUp.ReferenceOTU288	sp_0503	0	0	0	0	0	0	0	0	0	538	0	0	0	0	0	0	0	0	0	0	0	Bacteria; Tenericutes; Mollicutes; RF39
New.CleanUp.ReferenceOTU29	sp_0378	3	0	17	0	0	8	0	2	0	3	3	4	62	5	54	2	0	35	2	0	19	Bacteria; Firmicutes; Clostridia; Clostridiales; Ruminococcaceae
New.CleanUp.ReferenceOTU291	sp_1657	0	0	0	0	0	0	0	0	0	2	0	0	0	0	0	0	0	0	0	0	0	Bacteria; Bacteroidetes; Bacteroidia; Bacteroidales; [Paraprevotellaceae]; [Prevotella]
New.CleanUp.ReferenceOTU295	sp_1294	0	0	0	0	0	0	0	0	0	6	0	0	0	0	0	0	0	0	0	0	0	Bacteria; Firmicutes; Clostridia; Clostridiales; Ruminococcaceae
New.CleanUp.ReferenceOTU296	sp_1447	0	0	0	0	0	0	0	0	0	3	0	0	0	0	0	0	0	0	0	0	0	Bacteria; Firmicutes; Clostridia; Clostridiales; Ruminococcaceae
New.CleanUp.ReferenceOTU297	sp_1658	0	0	0	0	0	0	0	0	0	2	0	0	0	0	0	0	0	0	0	0	0	Bacteria; Firmicutes; Clostridia; Clostridiales; Ruminococcaceae
New.CleanUp.ReferenceOTU299	sp_1407	0	0	0	0	0	0	0	0	0	4	0	0	0	0	0	0	0	0	0	0	0	Bacteria; Bacteroidetes; Bacteroidia; Bacteroidales; [Paraprevotellaceae]; [Prevotella]
New.CleanUp.ReferenceOTU3	sp_0444	0	51	3	2	0	5	4	180	2	2	7	0	2	2	0	9	7	0	11	0	0	Bacteria; Firmicutes; Clostridia; Clostridiales; Ruminococcaceae
New.CleanUp.ReferenceOTU30	sp_0104	46	2	50	8	223	4670	3	0	230	157	3	4	2	0	0	28	12	0	3	4	0	Bacteria; Firmicutes; Clostridia; Clostridiales; Ruminococcaceae
New.CleanUp.ReferenceOTU300	sp_1659	0	0	0	0	0	0	0	0	0	2	0	0	0	0	0	0	0	0	0	0	0	Bacteria; Bacteroidetes; Bacteroidia; Bacteroidales; Prevotellaceae; Prevotella; copri
New.CleanUp.ReferenceOTU301	sp_1660	0	0	0	0	0	0	0	0	0	2	0	0	0	0	0	0	0	0	0	0	0	Bacteria; Firmicutes; Bacilli; Lactobacillales; Lactobacillaceae; Lactobacillus
New.CleanUp.ReferenceOTU302	sp_1207	0	0	0	0	0	0	0	0	0	8	0	0	0	0	0	0	0	0	0	0	0	Unassigned
New.CleanUp.ReferenceOTU304	sp_0901	0	0	0	0	0	0	0	0	0	47	0	0	0	0	0	0	0	0	0	0	0	Bacteria; Firmicutes; Clostridia; Clostridiales; Ruminococcaceae
New.CleanUp.ReferenceOTU305	sp_1115	0	0	0	0	0	0	0	0	0	13	0	0	0	0	0	0	0	0	0	0	0	Bacteria; Bacteroidetes; Bacteroidia; Bacteroidales; Prevotellaceae; Prevotella; copri
New.CleanUp.ReferenceOTU306	sp_0658	0	0	0	0	0	0	0	0	0	247	0	0	0	0	0	0	0	0	0	0	0	Bacteria; Firmicutes; Clostridia; Clostridiales; Ruminococcaceae
New.CleanUp.ReferenceOTU307	sp_1661	0	0	0	0	0	0	0	0	0	2	0	0	0	0	0	0	0	0	0	0	0	Bacteria; Bacteroidetes; Bacteroidia; Bacteroidales; Prevotellaceae; Prevotella; stercorea
New.CleanUp.ReferenceOTU31	sp_0640	0	0	2	3	0	0	2	2	0	13	2	3	11	3	6	0	0	13	7	0	9	Bacteria; Tenericutes; Mollicutes; RF39
New.CleanUp.ReferenceOTU310	sp_1662	0	0	0	0	0	0	0	0	0	2	0	0	0	0	0	0	0	0	0	0	0	Bacteria; Tenericutes; Mollicutes; RF39
New.CleanUp.ReferenceOTU313	sp_1448	0	0	0	0	0	0	0	0	0	3	0	0	0	0	0	0	0	0	0	0	0	Bacteria; Firmicutes; Clostridia; Clostridiales; Ruminococcaceae
New.CleanUp.ReferenceOTU314	sp_1663	0	0	0	0	0	0	0	0	0	2	0	0	0	0	0	0	0	0	0	0	0	Bacteria; Bacteroidetes; Bacteroidia; Bacteroidales; Prevotellaceae; Prevotella; stercorea
New.CleanUp.ReferenceOTU315	sp_1152	0	0	0	0	0	0	0	0	0	11	0	0	0	0	0	0	0	0	0	0	0	Bacteria; Firmicutes; Clostridia; Clostridiales; Ruminococcaceae; Oscillospira
New.CleanUp.ReferenceOTU317	sp_1408	0	0	0	0	0	0	0	0	0	4	0	0	0	0	0	0	0	0	0	0	0	Bacteria; Firmicutes; Clostridia; Clostridiales; Ruminococcaceae; Ruminococcus
New.CleanUp.ReferenceOTU318	sp_1342	0	0	0	0	0	0	0	0	0	5	0	0	0	0	0	0	0	0	0	0	0	Bacteria; Firmicutes; Clostridia; Clostridiales; [Mogibacteriaceae]
New.CleanUp.ReferenceOTU32	sp_0421	10	2	0	6	8	53	9	9	13	2	0	16	5	0	3	169	0	2	21	0	0	Bacteria; Firmicutes; Clostridia; Clostridiales; Peptococcaceae; rc4-4
New.CleanUp.ReferenceOTU320	sp_1664	0	0	0	0	0	0	0	0	0	2	0	0	0	0	0	0	0	0	0	0	0	Bacteria; Cyanobacteria; 4C0d-2; YS2
New.CleanUp.ReferenceOTU321	sp_1665	0	0	0	0	0	0	0	0	0	2	0	0	0	0	0	0	0	0	0	0	0	Bacteria; Bacteroidetes; Bacteroidia; Bacteroidales; Prevotellaceae; Prevotella; copri
New.CleanUp.ReferenceOTU322	sp_0539	0	0	0	0	0	0	0	0	0	447	0	0	0	0	0	0	0	0	0	0	0	Bacteria; Firmicutes; Clostridia; Clostridiales; Lachnospiraceae
New.CleanUp.ReferenceOTU323	sp_1666	0	0	0	0	0	0	0	0	0	2	0	0	0	0	0	0	0	0	0	0	0	Bacteria; Firmicutes; Erysipelotrichi; Erysipelotrichales; Erysipelotrichaceae; RFN20
New.CleanUp.ReferenceOTU324	sp_1667	0	0	0	0	0	0	0	0	0	2	0	0	0	0	0	0	0	0	0	0	0	Bacteria; Firmicutes; Clostridia; Clostridiales; Ruminococcaceae
New.CleanUp.ReferenceOTU327	sp_1668	0	0	0	0	0	0	0	0	0	2	0	0	0	0	0	0	0	0	0	0	0	Bacteria; Firmicutes; Clostridia; Clostridiales; Lachnospiraceae
New.CleanUp.ReferenceOTU328	sp_0072	0	0	0	0	0	0	0	0	0	8042	0	0	0	0	0	0	0	0	0	0	0	Bacteria; Firmicutes; Clostridia; Clostridiales
New.CleanUp.ReferenceOTU329	sp_0895	0	0	0	0	0	0	0	0	0	49	0	0	0	0	0	0	0	0	0	0	0	Bacteria; Spirochaetes; Spirochaetes; Spirochaetales; Spirochaetaceae; Treponema
New.CleanUp.ReferenceOTU33	sp_0289	1183	5	4	4	0	24	4	2	0	0	60	0	94	44	0	3	0	84	12	2	0	Bacteria; Firmicutes; Clostridia; Clostridiales; Ruminococcaceae
New.CleanUp.ReferenceOTU331	sp_0936	0	0	0	0	0	0	0	0	0	38	0	0	0	0	0	0	0	0	0	0	0	Bacteria; Firmicutes; Erysipelotrichi; Erysipelotrichales; Erysipelotrichaceae; RFN20
New.CleanUp.ReferenceOTU332	sp_0937	0	0	0	0	0	0	0	0	0	38	0	0	0	0	0	0	0	0	0	0	0	Bacteria; Firmicutes; Clostridia; Clostridiales; Ruminococcaceae; Oscillospira
New.CleanUp.ReferenceOTU333	sp_0689	0	0	0	0	0	0	0	0	0	194	0	0	0	0	0	0	0	0	0	0	0	Unassigned
New.CleanUp.ReferenceOTU334	sp_1409	0	0	0	0	0	0	0	0	0	4	0	0	0	0	0	0	0	0	0	0	0	Bacteria; Bacteroidetes; Bacteroidia; Bacteroidales; Prevotellaceae; Prevotella; stercorea
New.CleanUp.ReferenceOTU336	sp_1295	0	0	0	0	0	0	0	0	0	6	0	0	0	0	0	0	0	0	0	0	0	Bacteria; Firmicutes; Clostridia; Clostridiales; Ruminococcaceae
New.CleanUp.ReferenceOTU34	sp_0489	7	0	41	2	0	0	0	3	2	0	0	0	0	2	8	2	0	3	72	0	11	Unassigned
New.CleanUp.ReferenceOTU35	sp_0209	191	8	7	2	7	2	11	5	5	5	0	0	18	5	0	5	0	0	3	5	1040	Bacteria; Firmicutes; Erysipelotrichi; Erysipelotrichales; Erysipelotrichaceae
New.CleanUp.ReferenceOTU36	sp_0516	0	318	35	0	0	0	0	2	0	2	3	0	3	25	0	6	4	2	8	0	4	Unassigned
New.CleanUp.ReferenceOTU37	sp_0483	0	5	21	2	26	6	0	3	0	0	2	99	3	130	43	3	2	6	39	23	3	Bacteria; Firmicutes; Clostridia; Clostridiales; Ruminococcaceae
New.CleanUp.ReferenceOTU38	sp_0266	0	2	24	13	45	0	0	2	0	0	0	3	9	4	51	0	3	0	36	8	18	Bacteria; Firmicutes; Clostridia; Clostridiales; Lachnospiraceae; Lachnospira
New.CleanUp.ReferenceOTU39	sp_0075	0	7410	3	5	10	0	0	0	0	77	23	0	0	5	33	5	4	15	0	4	10	Unassigned
New.CleanUp.ReferenceOTU4	sp_0558	18	17	6	0	8	0	0	59	6	3	28	2	0	4	8	28	0	6	0	0	27	Bacteria; Bacteroidetes; Bacteroidia; Bacteroidales; Prevotellaceae; Prevotella; stercorea
New.CleanUp.ReferenceOTU40	sp_0140	6	3	0	0	3	11	0	169	16	128	0	15	3	0	0	2	3	4	3303	78	0	Bacteria; Bacteroidetes; Bacteroidia; Bacteroidales; Prevotellaceae; Prevotella; copri
New.CleanUp.ReferenceOTU41	sp_0614	2	0	0	0	7	0	2	46	2	17	4	5	0	0	14	0	7	0	2	0	2	Bacteria; Proteobacteria; Alphaproteobacteria; RF32
New.CleanUp.ReferenceOTU42	sp_0368	6	7	4	0	4	17	0	8	5	4	10	5	44	3	0	0	13	51	0	0	524	Bacteria; Tenericutes; Mollicutes; RF39
New.CleanUp.ReferenceOTU43	sp_0632	8	3	0	3	13	0	3	7	6	33	4	4	0	7	2	3	16	21	6	3	54	Bacteria; Firmicutes; Clostridia; Clostridiales; Ruminococcaceae; Oscillospira
New.CleanUp.ReferenceOTU44	sp_0575	0	10	0	0	0	44	0	44	0	0	2	0	0	0	22	2	4	3	2	0	0	Bacteria; Bacteroidetes; Bacteroidia; Bacteroidales; Prevotellaceae; Prevotella; copri
New.CleanUp.ReferenceOTU45	sp_0381	2	7	9	2	60	3	24	12	2	93	0	0	0	47	3	3	8	3	2	0	196	Bacteria; Firmicutes; Clostridia; Clostridiales; Ruminococcaceae
New.CleanUp.ReferenceOTU46	sp_0084	3	6709	10	2	0	79	19	2	0	0	4	101	63	13	0	5	28	0	13	0	15	Bacteria; Firmicutes; Clostridia; Clostridiales; Lachnospiraceae; Blautia
New.CleanUp.ReferenceOTU47	sp_0474	224	5	117	25	0	0	0	30	61	6	0	2	33	0	0	0	0	0	0	64	0	Bacteria; Firmicutes; Clostridia; Clostridiales; Ruminococcaceae
New.CleanUp.ReferenceOTU48	sp_0342	0	0	0	0	2	0	0	42	0	0	0	0	13	0	13	0	3	0	18	5	0	Bacteria; Firmicutes; Clostridia; Clostridiales; Lachnospiraceae
New.CleanUp.ReferenceOTU49	sp_0410	2	78	0	0	2	0	0	0	3	0	0	41	219	0	59	0	19	37	12	5	3	Bacteria; Firmicutes; Clostridia; Clostridiales; Ruminococcaceae
New.CleanUp.ReferenceOTU5	sp_0223	135	2	241	0	2	30	197	0	0	0	3	761	0	0	5	2	0	4	6	0	5	Bacteria; Spirochaetes; Spirochaetes; Spirochaetales; Spirochaetaceae; Treponema
New.CleanUp.ReferenceOTU50	sp_0437	0	3	3	4	5	0	549	30	12	0	6	5	8	37	0	19	0	7	2	4	0	Bacteria; Firmicutes; Clostridia; Clostridiales; Ruminococcaceae; Oscillospira
New.CleanUp.ReferenceOTU51	sp_0579	0	11	3	3	131	2	0	3	7	0	0	70	11	0	16	0	3	9	16	2	6	Bacteria; Bacteroidetes; Bacteroidia; Bacteroidales; Prevotellaceae; Prevotella
New.CleanUp.ReferenceOTU52	sp_0325	0	32	2	0	2	104	0	6	9	0	2	7	4	0	25	12	0	6	0	0	4	Bacteria; Firmicutes; Clostridia; Clostridiales; Ruminococcaceae
New.CleanUp.ReferenceOTU53	sp_0246	0	1612	0	10	27	14	6	0	24	101	0	0	0	2	2	0	10	37	0	17	0	Bacteria; Firmicutes; Erysipelotrichi; Erysipelotrichales; Erysipelotrichaceae; RFN20
New.CleanUp.ReferenceOTU54	sp_0160	8	17	61	724	2	0	3	2208	33	5	2	15	31	7	0	5	2	79	0	13	4	Bacteria; Firmicutes; Clostridia; Clostridiales; Ruminococcaceae; Oscillospira
New.CleanUp.ReferenceOTU55	sp_0255	4	1203	3	0	134	42	4	0	6	0	13	44	3	8	13	0	2	0	44	0	23	Bacteria; Tenericutes; Mollicutes; RF39
New.CleanUp.ReferenceOTU56	sp_0265	4	0	2	0	2	0	2	32	9	3	0	0	41	0	12	0	51	3	5	0	0	Unassigned
New.CleanUp.ReferenceOTU57	sp_0273	0	44	17	2	13	0	0	0	0	0	0	38	0	2	582	2	3	0	11	17	7	Unassigned
New.CleanUp.ReferenceOTU58	sp_0203	2	0	2	2145	6	20	52	14	8	9	29	0	3	0	12	0	3	2	40	2	4	Bacteria; Tenericutes; Mollicutes; RF39
New.CleanUp.ReferenceOTU59	sp_0522	2	3	6	21	0	20	21	25	3	0	5	0	11	3	8	7	9	0	6	7	2	Bacteria; Firmicutes; Clostridia; Clostridiales; Veillonellaceae; Acidaminococcus
New.CleanUp.ReferenceOTU6	sp_0170	17	0	62	4	0	2	2518	0	0	9	0	3	17	34	4	110	0	11	21	5	32	Bacteria; Firmicutes; Clostridia; Clostridiales; [Mogibacteriaceae]
New.CleanUp.ReferenceOTU60	sp_0455	36	6	366	0	28	6	29	50	20	0	0	0	57	0	4	0	0	0	2	0	0	Bacteria; Bacteroidetes; Bacteroidia; Bacteroidales
New.CleanUp.ReferenceOTU61	sp_0278	109	4	4	11	9	3	0	4	49	0	630	381	16	4	0	11	0	32	0	4	7	Bacteria; Cyanobacteria; 4C0d-2; YS2
New.CleanUp.ReferenceOTU62	sp_0309	0	0	0	0	30	0	0	0	0	0	29	0	0	0	17	5	0	4	0	15	3	Bacteria; Bacteroidetes; Bacteroidia; Bacteroidales; Prevotellaceae; Prevotella
New.CleanUp.ReferenceOTU63	sp_0461	29	2	3	33	3	0	0	0	0	15	0	0	2	0	2	17	0	2	12	4	6	Bacteria; Firmicutes; Clostridia; Clostridiales; [Mogibacteriaceae]
New.CleanUp.ReferenceOTU64	sp_0128	2	2	16	75	0	2	2	3	58	3	9	17	0	0	13	18	0	7	49	9	4	Bacteria; Firmicutes; Clostridia; Clostridiales; Lachnospiraceae
New.CleanUp.ReferenceOTU65	sp_0569	2	0	2	10	5	17	3	0	0	0	6	14	2	0	2	0	4	3	2	4	46	Bacteria; Cyanobacteria; 4C0d-2; YS2
New.CleanUp.ReferenceOTU66	sp_0404	9	0	0	3	0	18	5	3	0	8	3	19	0	496	2	3	0	9	7	3	3	Unassigned
New.CleanUp.ReferenceOTU67	sp_0617	9	6	13	16	0	8	0	6	3	0	9	0	0	0	7	5	0	0	0	3	0	Bacteria; Firmicutes; Clostridia; Clostridiales; Ruminococcaceae
New.CleanUp.ReferenceOTU68	sp_0544	4	59	3	3	5	2	4	0	5	0	18	43	2	0	14	2	19	4	75	23	43	Bacteria; Firmicutes; Clostridia; Clostridiales
New.CleanUp.ReferenceOTU69	sp_0435	2	0	0	0	0	0	7	5	0	2	5	0	29	11	2	14	0	18	94	2	5	Bacteria; Bacteroidetes; Bacteroidia; Bacteroidales; Prevotellaceae; Prevotella; copri
New.CleanUp.ReferenceOTU7	sp_0187	0	9	14	10	0	66	3	146	2	8	52	4	9	7	17	0	26	31	3	14	11	Bacteria; Firmicutes; Clostridia; Clostridiales; Lachnospiraceae; Coprococcus
New.CleanUp.ReferenceOTU70	sp_0405	9	4	0	37	120	2	0	2	38	0	0	0	7	0	5	146	10	0	27	202	6	Bacteria; Firmicutes; Clostridia; Clostridiales; Lachnospiraceae
New.CleanUp.ReferenceOTU71	sp_0413	0	4	4	103	2	29	3	2	2	4	199	2	12	2	0	0	239	0	29	0	3	Bacteria; Bacteroidetes; Bacteroidia; Bacteroidales; Prevotellaceae; Prevotella
New.CleanUp.ReferenceOTU72	sp_0524	2	0	10	37	0	9	7	5	30	2	23	0	14	48	4	6	22	9	5	0	15	Bacteria; Bacteroidetes; Bacteroidia; Bacteroidales; Prevotellaceae; Prevotella
New.CleanUp.ReferenceOTU73	sp_0280	0	5	2	297	2	7	9	11	30	4	4	4	38	20	9	47	0	0	5	0	0	Bacteria; Bacteroidetes; Bacteroidia; Bacteroidales; Porphyromonadaceae; Parabacteroides
New.CleanUp.ReferenceOTU74	sp_0369	0	46	15	4	11	17	0	27	0	0	2	5	0	44	0	108	7	3	5	3	350	Bacteria; Bacteroidetes; Bacteroidia; Bacteroidales; S24-7
New.CleanUp.ReferenceOTU75	sp_0643	2	2	4	3	0	2	4	60	9	4	0	0	9	2	5	49	0	21	2	15	0	Bacteria; Firmicutes; Clostridia; Clostridiales; Veillonellaceae; Acidaminococcus
New.CleanUp.ReferenceOTU76	sp_0253	0	0	0	0	11	28	3	34	10	5	0	26	5	0	0	39	3	0	0	8	0	Bacteria; Tenericutes; Mollicutes; RF39
New.CleanUp.ReferenceOTU77	sp_0478	97	0	0	90	5	0	10	101	4	0	118	33	2	19	0	0	23	5	0	3	0	Bacteria; Firmicutes; Clostridia; Clostridiales; Lachnospiraceae
New.CleanUp.ReferenceOTU78	sp_0268	0	6	9	8	19	0	38	2	2	1513	0	0	0	0	0	6	17	0	0	0	2	Bacteria; Firmicutes; Clostridia; Clostridiales; Ruminococcaceae; Ruminococcus
New.CleanUp.ReferenceOTU79	sp_0513	80	2	17	0	3	20	13	0	0	0	0	29	73	7	2	4	15	3	113	2	0	Bacteria; Firmicutes; Clostridia; Clostridiales; Ruminococcaceae
New.CleanUp.ReferenceOTU8	sp_0393	2	0	0	95	5	0	5	117	0	5	0	4	409	109	0	0	2	47	2	3	0	Bacteria; Firmicutes; Clostridia; Clostridiales; Ruminococcaceae
New.CleanUp.ReferenceOTU80	sp_0507	18	28	6	0	2	0	3	0	0	203	0	23	0	5	3	0	20	46	0	0	9	Bacteria; Proteobacteria; Betaproteobacteria; Burkholderiales; Alcaligenaceae; Sutterella
New.CleanUp.ReferenceOTU81	sp_0469	38	11	0	2	0	199	0	4	3	0	5	10	2	2	0	151	8	6	2	13	2	Bacteria; Firmicutes; Clostridia; Clostridiales; Veillonellaceae; Mitsuokella
New.CleanUp.ReferenceOTU82	sp_0294	0	2	0	5	0	3	46	92	48	15	25	0	3	0	8	16	35	82	11	3	10	Bacteria; Firmicutes; Erysipelotrichi; Erysipelotrichales; Erysipelotrichaceae; RFN20
New.CleanUp.ReferenceOTU83	sp_0438	9	2	2	15	26	2	5	0	0	0	3	0	13	93	3	445	0	8	0	41	2	Bacteria; Firmicutes; Clostridia; Clostridiales; Ruminococcaceae
New.CleanUp.ReferenceOTU84	sp_0464	0	0	3	0	2	0	8	8	61	6	5	2	6	4	7	28	3	0	0	20	0	Bacteria; Firmicutes; Clostridia; Clostridiales; Lachnospiraceae; Roseburia
New.CleanUp.ReferenceOTU85	sp_0685	29	8	0	3	2	2	2	19	8	2	0	6	28	12	0	9	0	11	8	11	0	Bacteria; Verrucomicrobia; Verruco-5; WCHB1-41; RFP12
New.CleanUp.ReferenceOTU86	sp_0315	2	598	0	0	0	0	277	308	2	0	0	0	16	4	0	0	9	2	46	9	0	Bacteria; Firmicutes; Clostridia; Clostridiales
New.CleanUp.ReferenceOTU87	sp_0367	2	16	220	0	0	6	2	0	0	4	0	30	0	8	4	0	0	144	0	7	20	Bacteria; Firmicutes; Clostridia; Clostridiales; Ruminococcaceae
New.CleanUp.ReferenceOTU88	sp_0229	25	8	13	0	20	10	86	0	0	0	3	8	2	13	0	2	0	14	0	0	0	Bacteria; Firmicutes; Clostridia; Clostridiales; Ruminococcaceae
New.CleanUp.ReferenceOTU89	sp_0077	16	0	0	22	5	10	10	2	7	6	4	27	14	6984	141	13	0	19	0	116	0	Bacteria; Firmicutes; Clostridia; Clostridiales; Clostridiaceae
New.CleanUp.ReferenceOTU9	sp_0499	0	58	9	0	118	0	0	5	44	51	2	3	0	14	3	0	13	0	2	0	7	Bacteria; Firmicutes; Clostridia; Clostridiales; Ruminococcaceae; Ruminococcus
New.CleanUp.ReferenceOTU90	sp_0515	70	17	2	0	36	125	0	0	2	11	13	0	0	2	8	6	22	7	52	69	6	Bacteria; Tenericutes; Mollicutes; RF39
New.CleanUp.ReferenceOTU91	sp_0542	5	5	15	0	102	17	0	0	0	8	11	0	0	0	26	0	12	32	54	2	0	Bacteria; Tenericutes; Mollicutes; RF39
New.CleanUp.ReferenceOTU92	sp_0263	10	6	0	71	2	0	2	3	7	2	3	5	8	0	6	249	511	108	11	12	20	Bacteria; Firmicutes; Clostridia; Clostridiales; Lachnospiraceae
New.CleanUp.ReferenceOTU93	sp_0269	44	6	481	5	3	2	0	14	3	58	10	3	5	0	2	13	0	794	38	3	37	Bacteria; Bacteroidetes; Bacteroidia; Bacteroidales; Prevotellaceae; Prevotella; copri
New.CleanUp.ReferenceOTU94	sp_0331	21	3	4	0	0	3	0	10	9	11	0	2	0	3	0	0	7	56	29	0	10	Bacteria; Firmicutes; Clostridia; Clostridiales
New.CleanUp.ReferenceOTU95	sp_0346	15	0	39	0	6	3	3	0	0	0	2	3	7	0	7	9	8	3	22	2	0	Bacteria; Firmicutes; Clostridia; Clostridiales; Ruminococcaceae
New.CleanUp.ReferenceOTU96	sp_0428	53	0	12	0	305	10	11	17	8	0	5	0	3	0	2	13	0	20	29	5	0	Bacteria; Bacteroidetes; Bacteroidia; Bacteroidales; Prevotellaceae; Prevotella
New.CleanUp.ReferenceOTU97	sp_0080	0	10	0	33	6358	155	0	2	4	4	0	0	231	2	6	9	72	5	4	4	188	Bacteria; Bacteroidetes; Bacteroidia; Bacteroidales
New.CleanUp.ReferenceOTU98	sp_0321	6	12	23	108	5	222	4	97	38	55	0	2	0	3	235	0	0	6	2	4	0	Bacteria; Firmicutes; Clostridia; Clostridiales; Ruminococcaceae
New.CleanUp.ReferenceOTU99	sp_0201	0	2	0	2	17	3	48	33	168	0	5	10	0	13	0	18	249	0	72	915	9	Bacteria; Firmicutes; Clostridia; Clostridiales
